# Supplementary material for: A PMMA-based heterogeneous photocatalyst for visible light-promoted [4 + 2] cycloaddition
Source: Royal Society of Chemistry journal article supplement (doi:10.1039/d0cy00016g), 2020-01-01
Supplement: d0cy00016g1.pdf [file d0cy00016g1.pdf]

## Electronic Supplementary Information

### **A PMMA-based heterogeneous photocatalyst for visible light-promoted (4+2) cycloaddition**

Niklas Huber,<sup>a</sup> Run Li,<sup>a</sup> Calum T. J. Ferguson,<sup>a</sup> Dominik W. Gehrig,<sup>a</sup> Charusheela Ramanan,<sup>a</sup>  
Paul W. M. Blom,<sup>a</sup> Katharina Landfester,<sup>a</sup> and Kai. A. I. Zhang<sup>\*a,b</sup>

<sup>a</sup> Max Planck Institute for Polymer Research, Ackermannweg 10, 55128 Mainz, Germany

E-mail: kai.zhang@mpip-mainz.mpg.de

<sup>b</sup> Department of Materials Science, Fudan University, Shanghai 200433, P. R. China

E-mail: kai\_zhang@fudan.edu.cn

## Characterization of Photocatalyst cPMMA-BTPh<sub>2</sub>

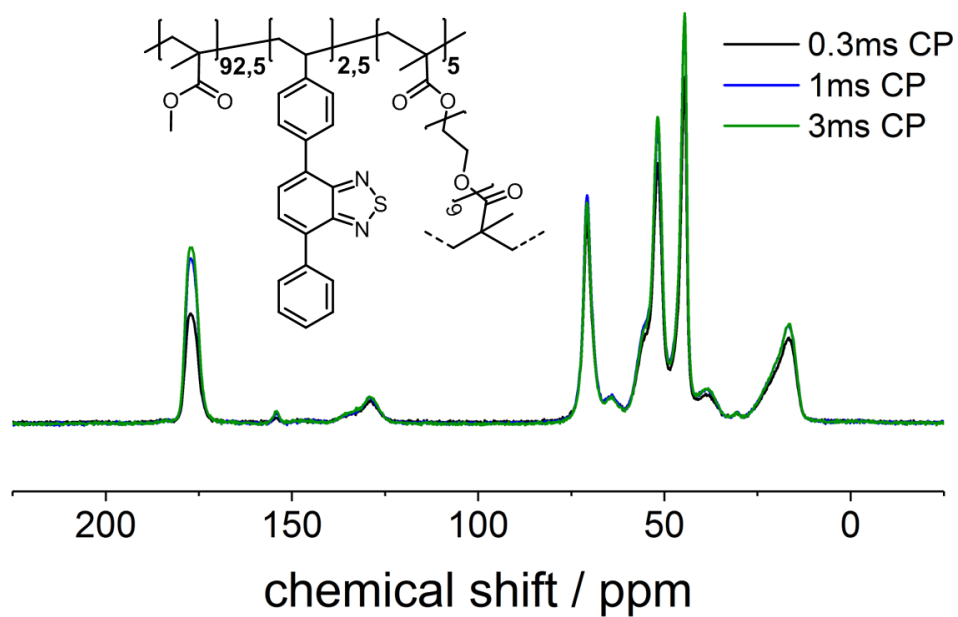

**Fig. S1.** <sup>13</sup>C CP-MAS NMR spectrum for different contact times (0.3 ms, 1 ms, 3 ms) of cPMMA-BTPh<sub>2</sub>.

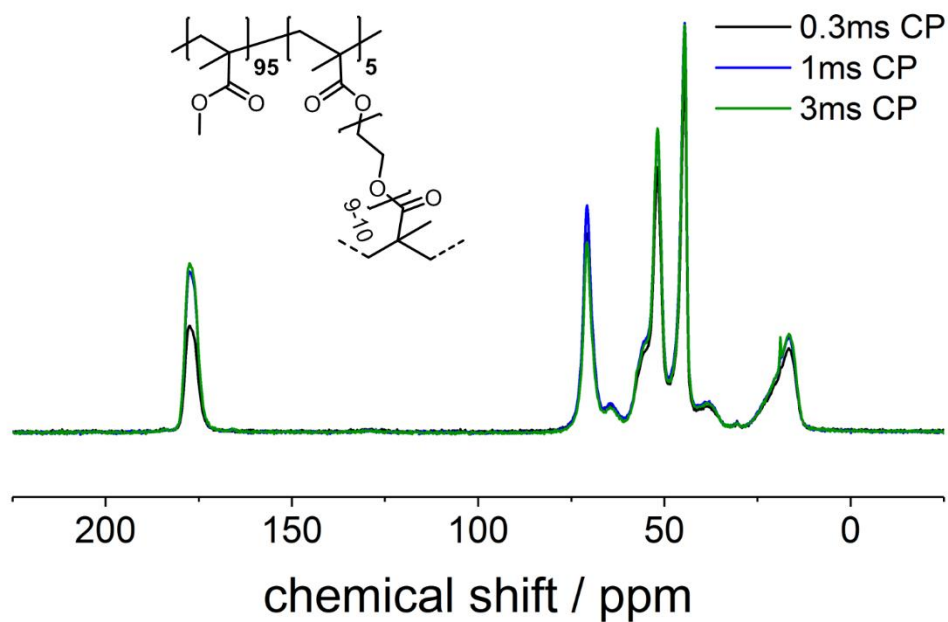

**Fig. S2.** <sup>13</sup>C CP-MAS NMR spectrum for different contact times (0.3 ms, 1 ms, 3 ms) of cPMMA.

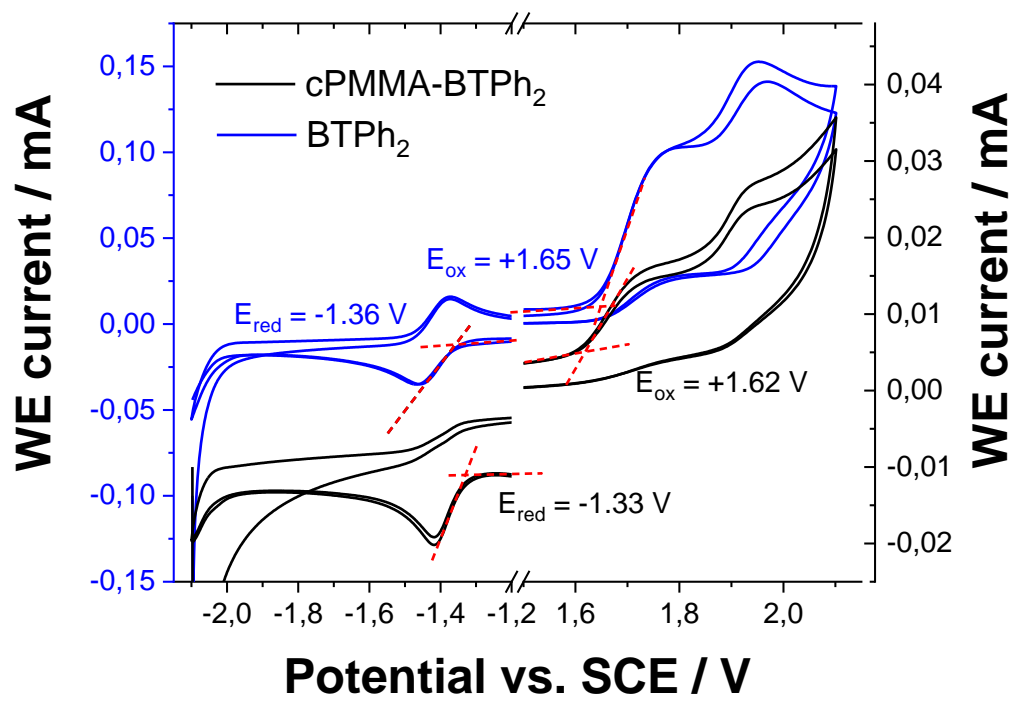

**Fig. S3.** Cyclic voltammetry of cPMMA-BTPPh<sub>2</sub> and BTPPh<sub>2</sub> with a scan rate of 100 mV/s in CH<sub>3</sub>CN.

**Table S1.** DFT and TDDFT-calculated electrooptical parameters of the catalysts (rB3LYP, 6-31+g(d))

|                                                                                                                              | HOMO<br>vs. SCE | LUMO<br>vs. SCE | Band Gap<br>(electr.) | $\lambda_{\text{max}}$<br>(calc.) | Band Gap<br>(optic.<br>calc. from<br>$\lambda_{\text{max}}$ ) |
|------------------------------------------------------------------------------------------------------------------------------|-----------------|-----------------|-----------------------|-----------------------------------|---------------------------------------------------------------|
| BTPH <sub>2</sub><br>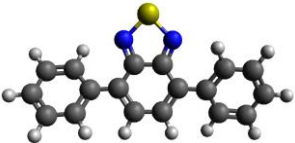                       | +1.64 V         | -1.70 V         | 2.93 eV               | 480 nm                            | 2.58 eV                                                       |
| cPMMA-BTPH <sub>2</sub><br>analogue 1<br>  | +1.36 V         | -1.51 V         | 2.87 eV               | 496 nm                            | 2.50 eV                                                       |
| cPMMA-BTPH <sub>2</sub><br>analogue 2<br> | +1.40 V         | -1.47 V         | 2.87 eV               | 496 nm                            | 2.50 eV                                                       |

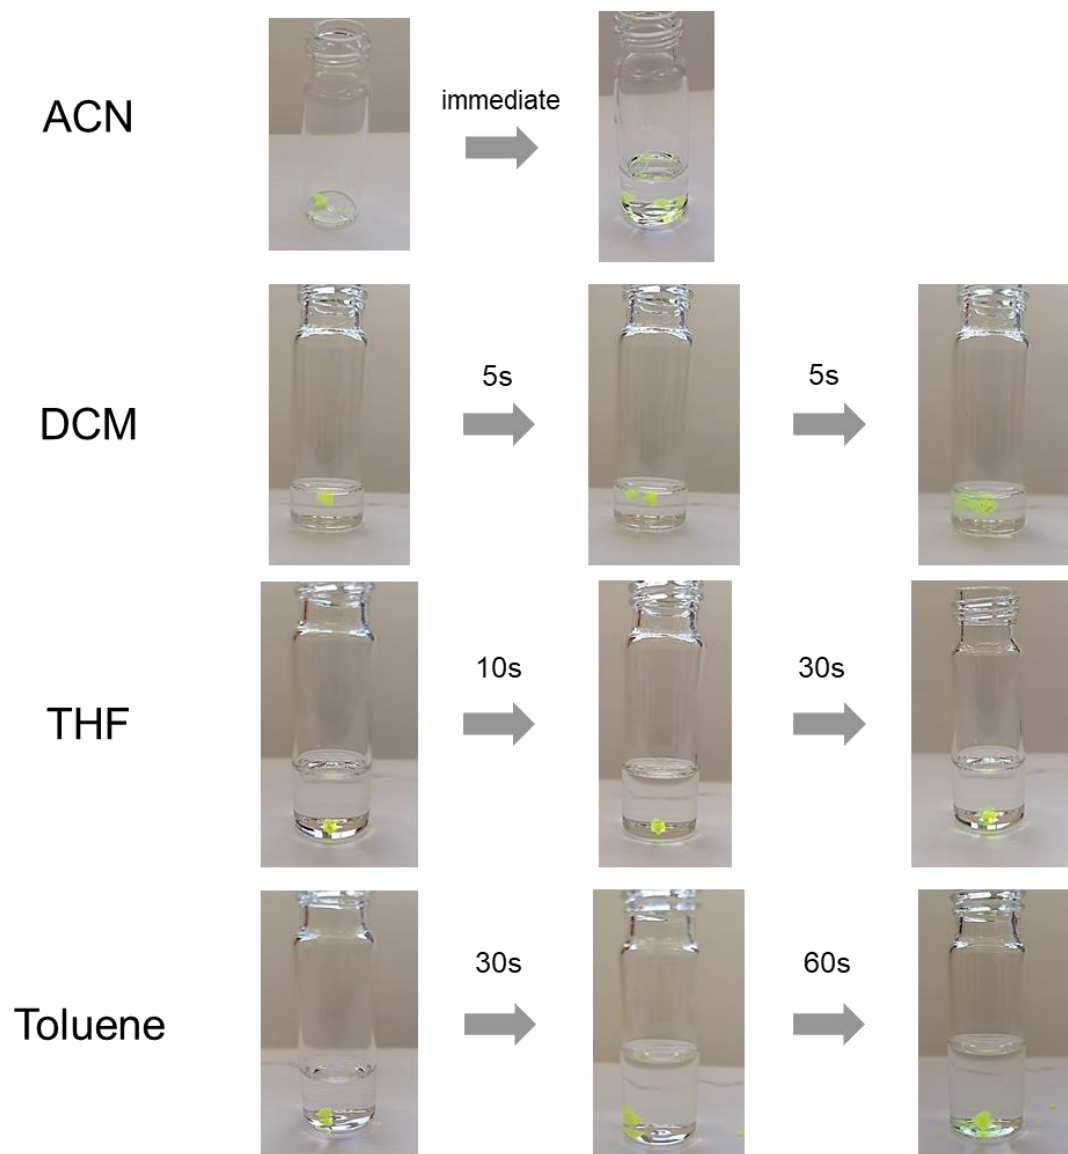

**Fig. S4.** Swelling experiments in acetonitrile, dichloromethane, THF and toluene. The pictures were taken after the times indicated.

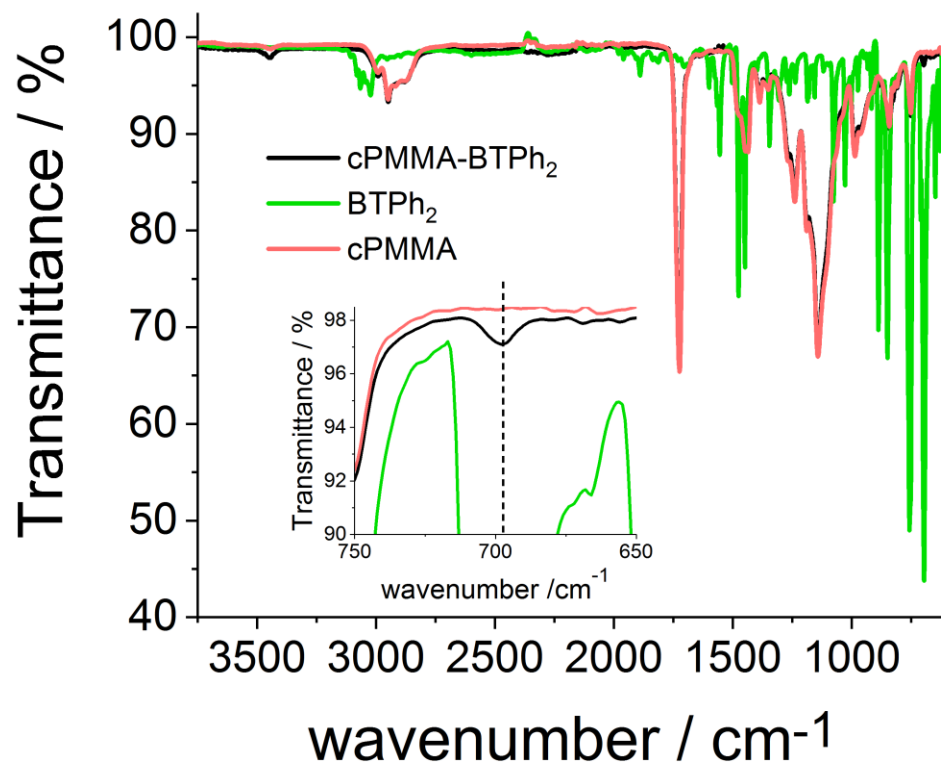

**Fig. S5.** Comparison of Fourier transform infrared (FTIR) spectra of cPMMA-BTPPh<sub>2</sub>, cPMMA and BTPPh<sub>2</sub>. cPMMA and cPMMA-BTPPh<sub>2</sub> differ only slightly at 696 cm<sup>-1</sup>, the major resonance of BTPPh<sub>2</sub>.

Current prices for used chemicals:

MMA – 18€ / 500g (Alfa)

Poly(ethylene glycol) dimethacrylate – 67,80€ / 250g (Sigma)

4,7-Dibromo-2,1,3-benzothiadiazole – 27,30 € / 1g (Alfa Aesar)

Phenylboronic acid – 37€ / 10g (Alfa Aesar)

4-Vinylphenylboronic acid – 95€ / 5g (TCI)

$\text{Pd}(\text{PPh}_3)_4$  – 105€ / 5g (TCI)

AIBN – 42€ / 25g (Sigma)

Cost of material for cPMMA-BTPh<sub>2</sub> (solvents not included):

**Monomer Synthesis:** Phenylboronic acid (509 mg), 4,7-Dibromo-2,1,3-benzothiadiazole (1840 mg),  $\text{Pd}(\text{PPh}_3)_4$  (283 mg), 4-Vinylphenylboronic acid (1150 mg) = 79,91€ for 950 mg of Monomer = 84,11 €/g

Monomer Price per 1 g

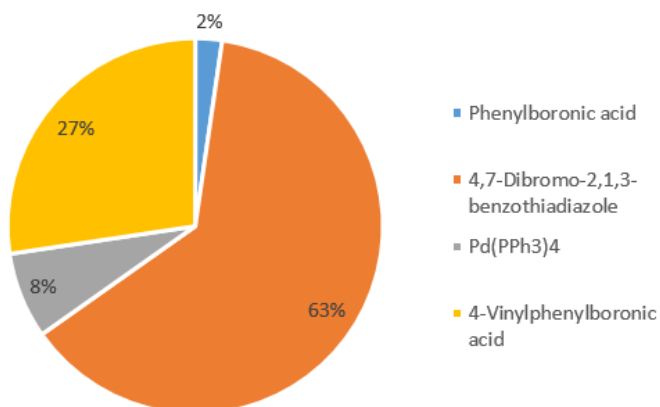

**Polymer Synthesis:** MMA (294 mg), PEGDMA (93 mg), AIBN (4 mg), Photocatalytic unit (25,5 mg) = 2,07€ for 300 mg of Polymer = 6,92 € / g

**Fig. S6.** Material cost estimation for the synthesis of 1g of cPMMA-BTPh<sub>2</sub>

## Photocatalysis

### Part A: Kinetic Study

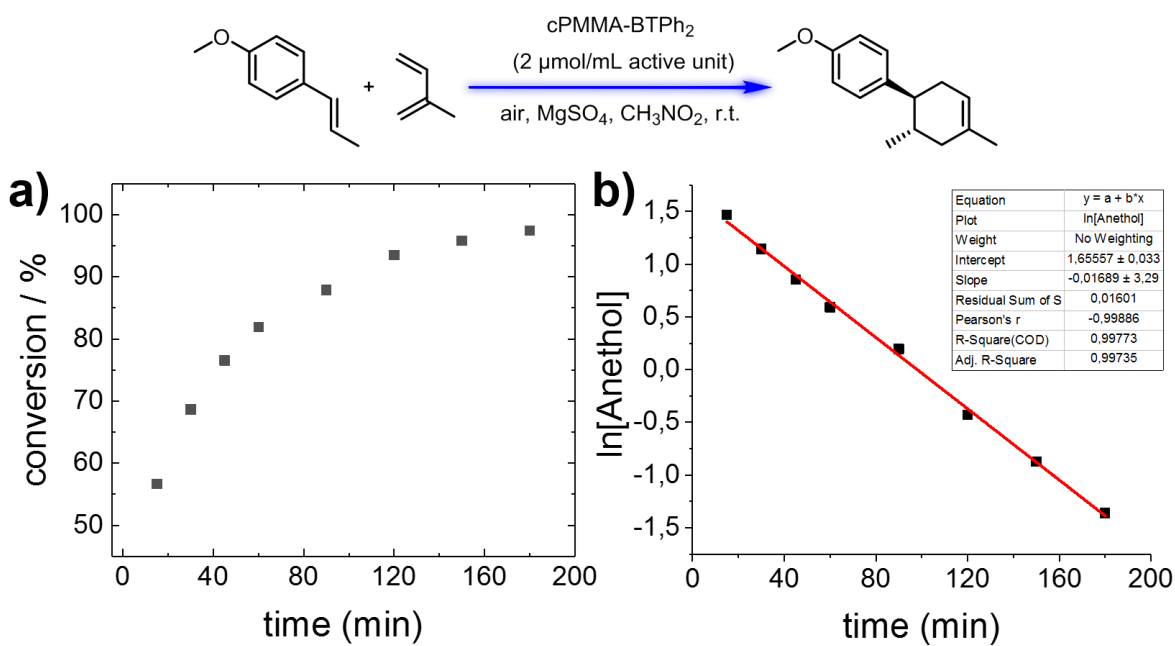

**Fig. S7.** Monitoring experiment of the photocatalytic Diels-Alder reaction. (a) Reaction conversion and (b) logarithmic plot of the concentration of *trans*-anethole during the reaction. The initial concentration of *trans*-anethole was 0.1 M.



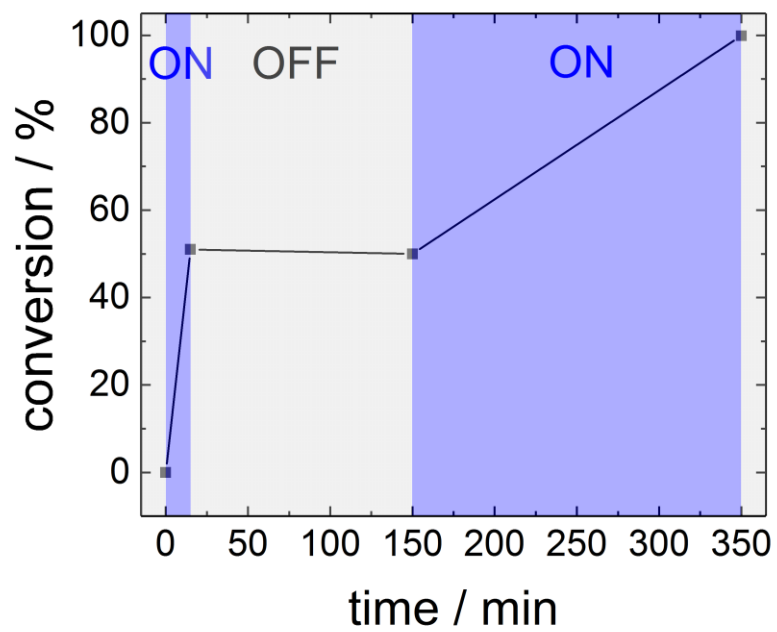

**Fig. S8.** Reaction conversion change during the light on and off experiment.

## Part B: Apparent Quantum Yield Calculation

$$\begin{aligned}\Phi_{\text{AQY}} &= \frac{\text{number of product molecules formed}}{\text{number of incident photons}} \\&= \frac{N_e}{N_p} \\&= \frac{n * N_A}{\left( \frac{P * t}{\frac{h * c}{\lambda}} \right)} \\&= \frac{n * N_A * h * c}{P * t * \lambda} \\&= \frac{0.125 * 10^{-3} \text{ mol} * 6.023 * 10^{23} \text{ mol}^{-1} * 6.63 * 10^{-34} \frac{\text{m}^2 \text{kg}}{\text{s}} \times 3 * 10^8 \frac{\text{m}}{\text{s}}}{\left( 0.8 \text{ cm} * 2.3 * 0.065 \frac{\text{W}}{\text{cm}^2} \right) \times 240 * 60 \text{ s} \times 460 * 10^{-9} \text{ m}} \\&= 0.0227 = 2.27\%\end{aligned}$$

### Part C: Recycle Experiment

The recycle experiment was conducted similar to the general procedure. Specifically, a dried vial with a magnetic stir bar was charged with *trans*-anethole (35.6 mg, 0.24 mmol), isoprene (240  $\mu$ L, 2.4 mmol), cPMMA-BTPH<sub>2</sub> (2.4 mg) and nitromethane (2.4 mL). After 4 h of reaction, the conversion was analyzed by GC-MS. The reaction mixture was centrifuged at 1000 rpm for 2 min and the supernatant was replaced by CH<sub>3</sub>NO<sub>2</sub>. Then, another equivalent of *trans*-anethole (35.6 mg, 0.24 mmol) and isoprene (240  $\mu$ L, 2.4 mmol) were added into the mixture and the solution was further irradiated under blue light. The catalyst was recycled 4 times.

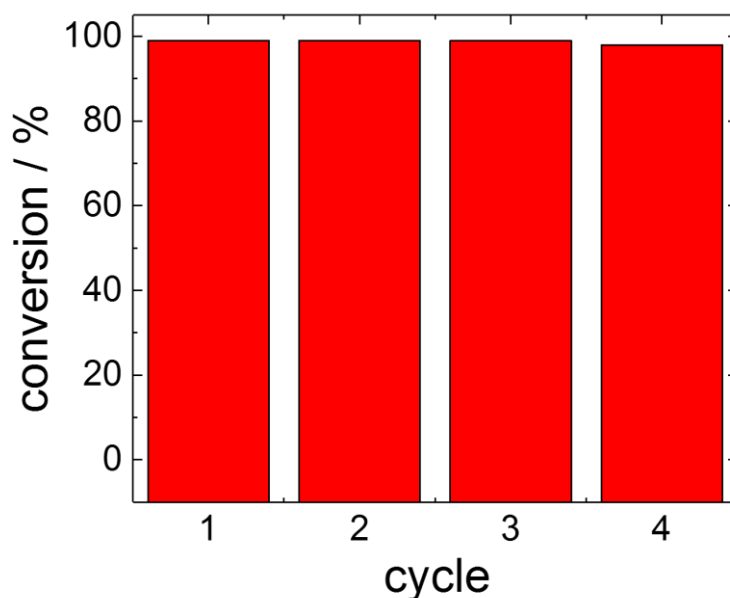

**Fig. S9.** Repeating experiment of the photocatalytic Diels-Alder reaction with cPMMA-BTPH<sub>2</sub>.

In the same way, BTPH<sub>2</sub> was tested. Without purification process, another equivalent of *trans*-anethole a dried vial with a magnetic stir bar was charged with *trans*-anethole (35.6 mg, 0.24 mmol), isoprene (240  $\mu$ L, 2.4 mmol), BTPH<sub>2</sub> (0.6 mg, 2.0  $\mu$ mol) and nitromethane (2.4 mL). After 2 h of reaction, the conversion was analyzed by GC-MS. Another equivalent of *trans*-anethole (35.6 mg, 0.24 mmol) and isoprene (240  $\mu$ L, 2.4 mmol) were added into the mixture and the solution was put under blue light irradiation. The procedure was repeated 3 times.

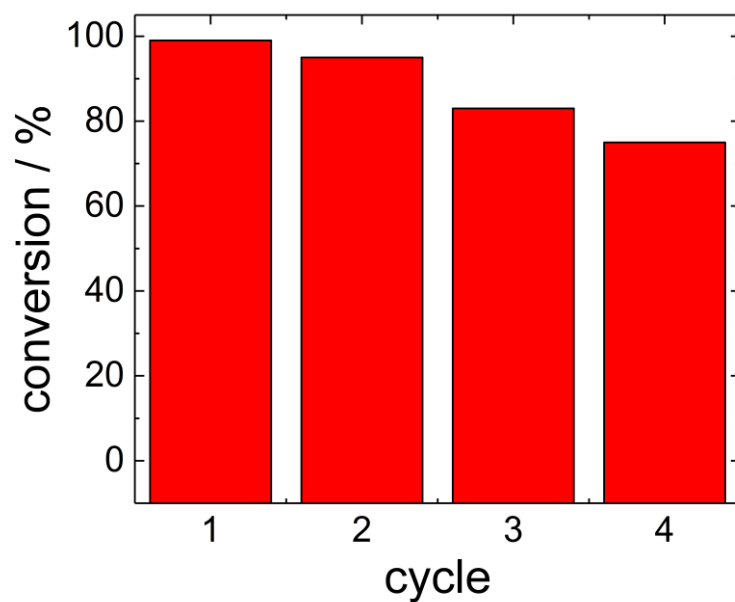

**Fig. S10.** Repeating experiment of the photocatalytic Diels-Alder reaction with BTPH<sub>2</sub>.

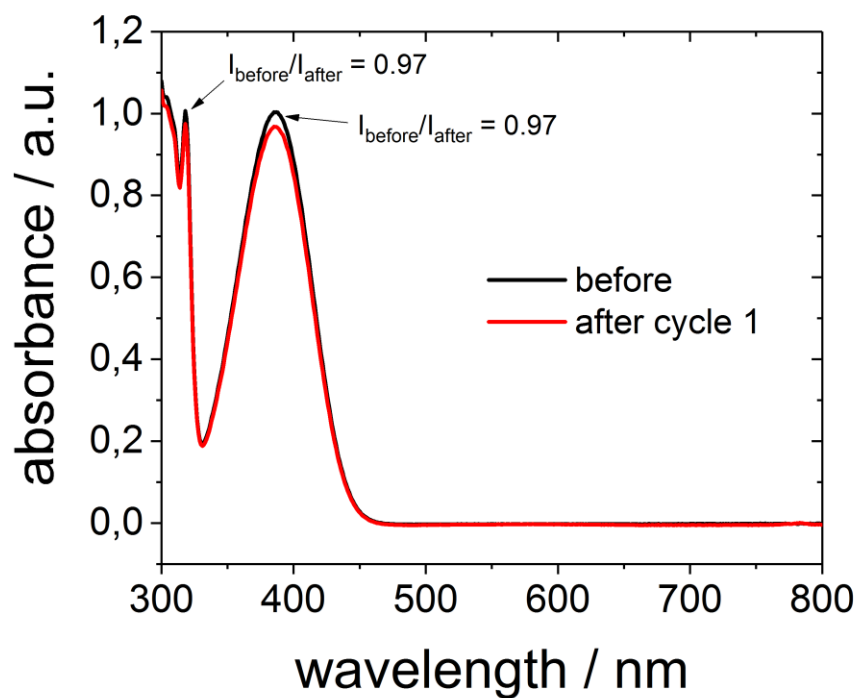

**Fig. S11.** UV-Vis spectra of cPMMA-BTPH<sub>2</sub> before and after the photocatalytic Diels-Alder reaction. The maximum intensities on both peaks show a similar decrease indicating this to be a concentration-related effect.

## Part D: Solubility Experiments

In order to prove the heterogeneity of the cPMMA-BTPh<sub>2</sub> photocatalyst the catalyst was irradiated with blue light while being stirred in CH<sub>3</sub>NO<sub>2</sub> (I), CDCl<sub>3</sub> (II) and *d*<sub>8</sub>-THF (III) respectively. For sample I, after 4h the mixture was filtered through a syringe filter. The solution was centrifuged for 10min at 10000 rpm and the supernatant was evaporated to dryness on the rotary evaporator. CDCl<sub>3</sub> was added to the round-bottom flask and taken for <sup>1</sup>H-NMR analysis. For the setups II and III the mixture was filtered through a syringe filter, centrifuged as above and the supernatant directly taken for <sup>1</sup>H-NMR.

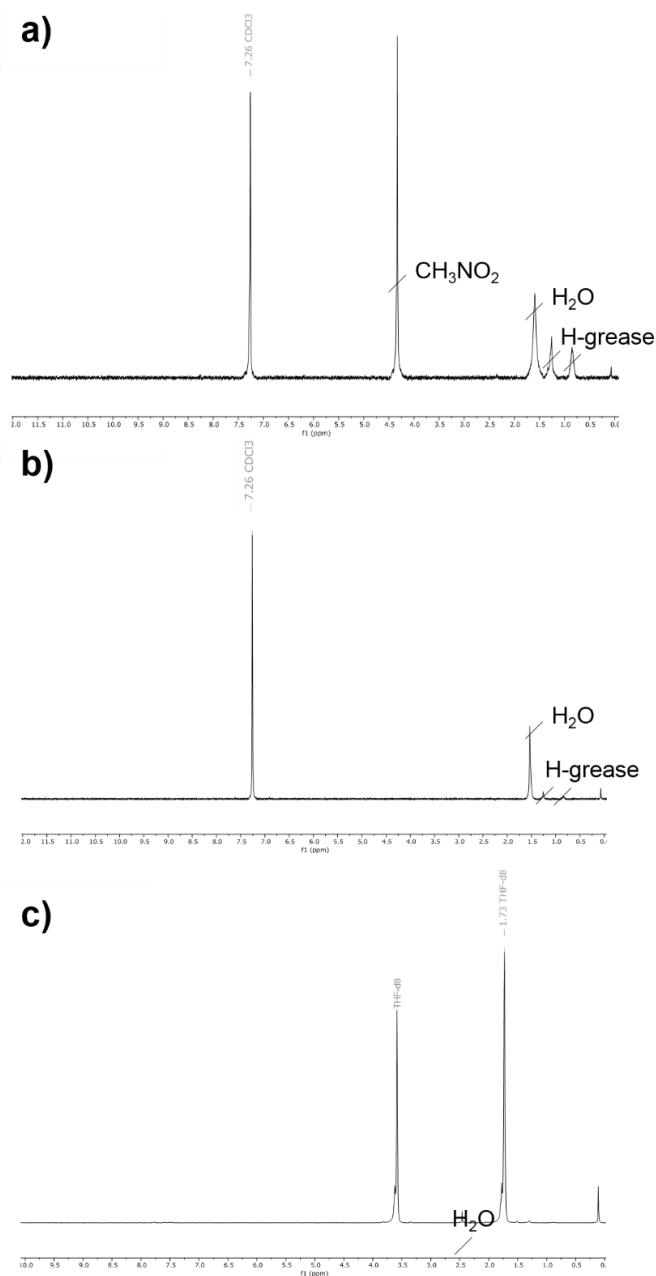

**Fig. S12.** <sup>1</sup>H-NMR spectra of a) experiment I b) experiment II and c) experiment III

## Part E: Transient Absorption Spectra

Transient absorption spectra were recorded to further investigate the concrete electron transfer process between the photocatalyst BTPH<sub>2</sub> and substrates in the Diels-Alder reaction.

The signal peaking at 660 nm represents the photo-induced absorption (PIA) of BTPH<sub>2</sub> in its excited state (Fig. S11). The lifetime of the singlet excited state of BTPH<sub>2</sub> in a N<sub>2</sub>-purged solution was determined to be 11.1 ns, which is consistent to that obtained from the time-resolved photoluminescence spectroscopy (TRPL). However, the addition of O<sub>2</sub> did not affect the PIA of BTPH<sub>2</sub> (Fig. S12). The possible reason might be that the phosphorescence signal for active oxygen species such as <sup>1</sup>O<sub>2</sub> normally localized on 1270 nm was beyond the detection limit of the transient absorption measurement. In comparison, the PIA curves of BTPH<sub>2</sub> under the addition of *trans*-anethole remained first the similar shape as that of pure BTPH<sub>2</sub> within the initial time from 1 ns to 3.1 ns, and then a new absorption peak at 610 nm appeared after 9.9 ns pulse irradiation (Fig. S13). This observation indicates that the formation of the radical cation of *trans*-anethole began to occur after 9.9 ns, which is similar as previous report,<sup>1</sup> thus supporting the proposed hole initiation mechanism. By increasing the concentration of *trans*-anethole, the absorption intensity of the mixture decayed faster, demonstrating the active electron transfer from the substrate to the photo-generated holes of the photocatalyst (Fig. S14). The decay profiles of the TA were consistent with the ones of the TRPL (Fig. S16 and Table S2).

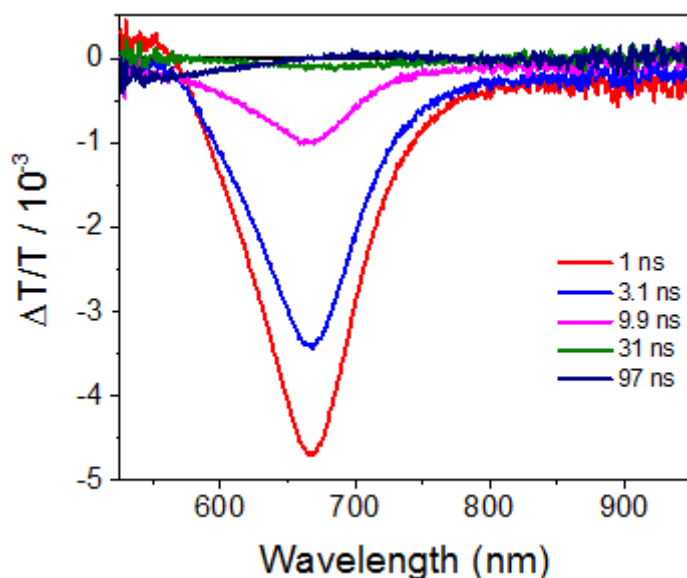

**Fig. S13.** Transient absorption spectra of BTPH<sub>2</sub> (20 mg/L in CH<sub>3</sub>CN) under N<sub>2</sub> at different times. Excitation wavelength 355 nm.

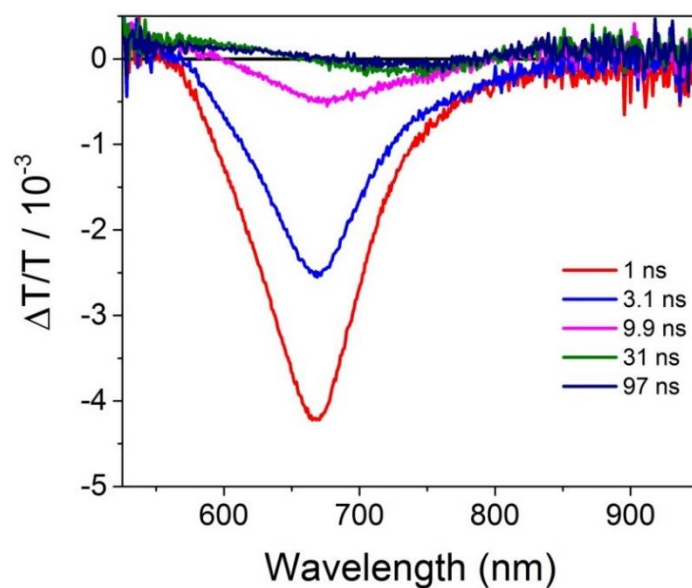

**Fig. S14.** Transient absorption spectra of BTPPh<sub>2</sub> (20 mg/L in CH<sub>3</sub>CN) under O<sub>2</sub> at different times. Excitation wavelength 355 nm.

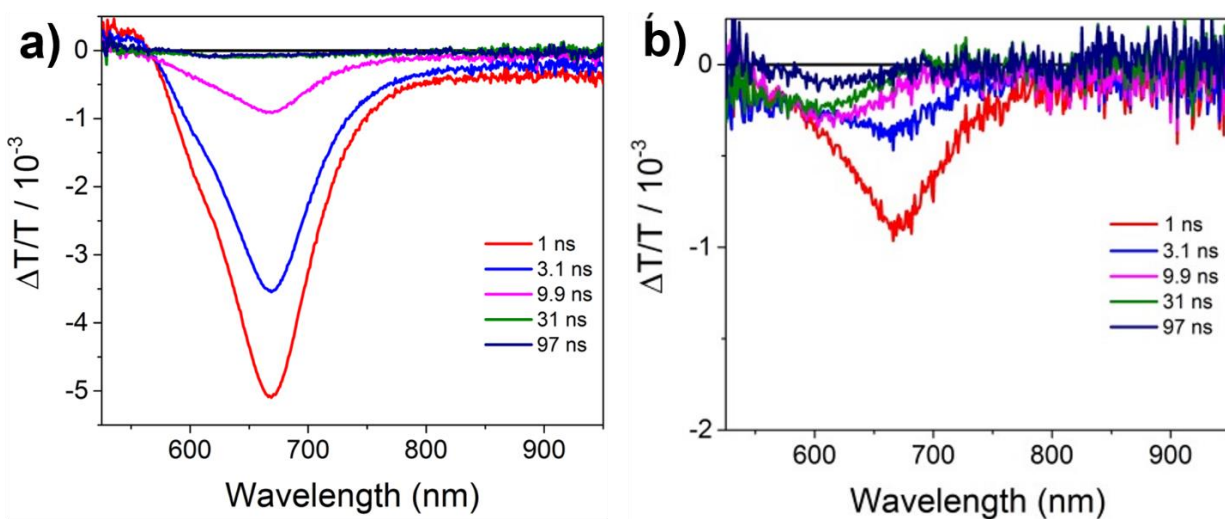

**Fig. S15.** Transient absorption spectra of BTPPh<sub>2</sub> (20 mg/L) and *trans*-anethole (2 mM for a) and 20 mM for b) ) under N<sub>2</sub> atmosphere in CH<sub>3</sub>CN at different times. Excitation wavelength 355 nm.

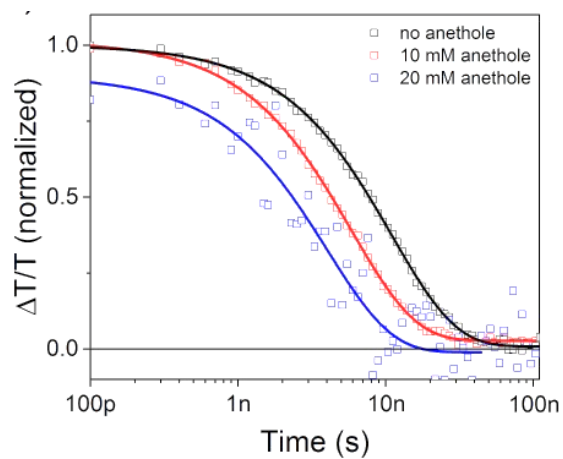

**Fig. S16.** Time profiles of the absorbance decay at 675 nm of pure BTP<sub>h2</sub> (black), with 10 mM *trans*-anethole (red) and 20 mM *trans*-anethole (blue) in CH<sub>3</sub>CN.

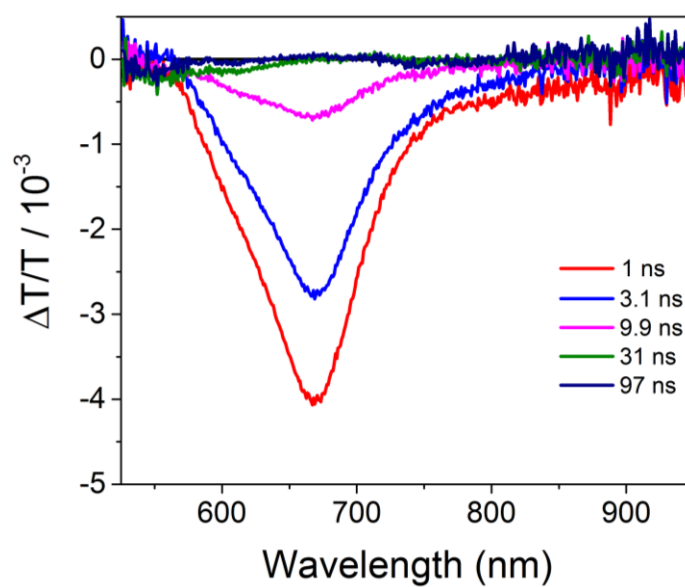

**Fig. S17.** Transient absorption spectra of BTP<sub>h2</sub> (20 mg/L) and *trans*-anethole (2 mM) under O<sub>2</sub> atmosphere in CH<sub>3</sub>CN at different times. Excitation wavelength 355 nm.



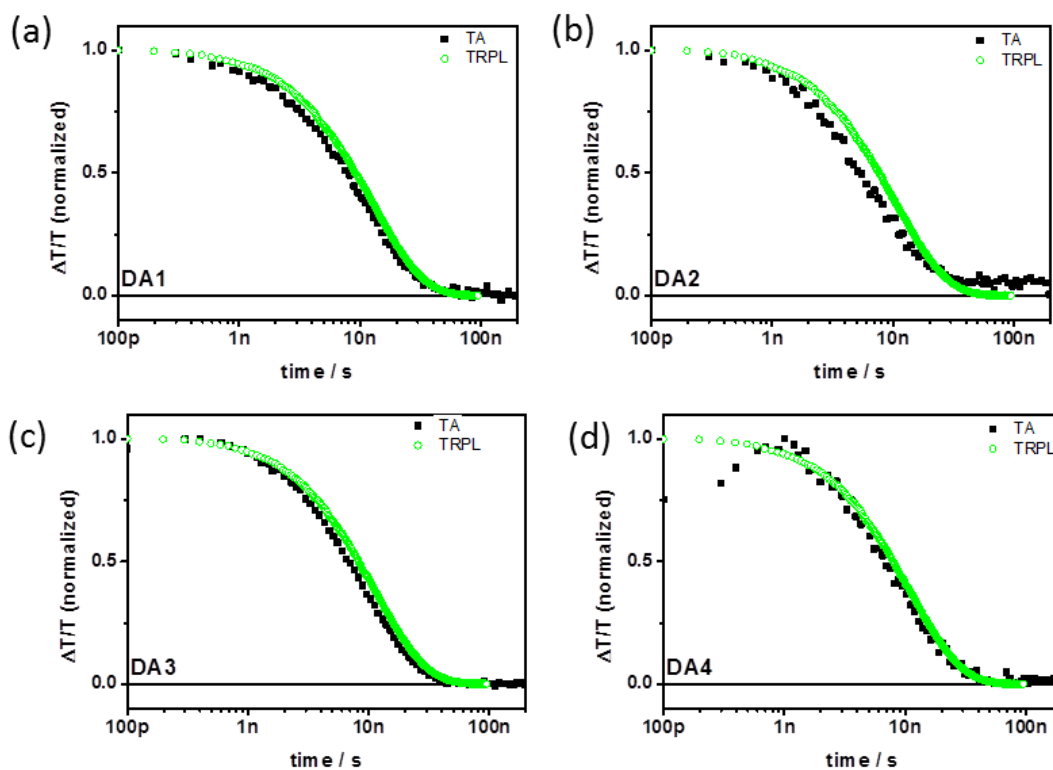

**Fig. S18.** Comparison of decay profiles of transient absorption (TA) at 660 – 690 nm and time-resolved photoluminescence (TRPL) at 480-520 nm for the Diels-Alder reaction. (a) pure BTPH<sub>2</sub> (20 mg/L in CH<sub>3</sub>CN) under N<sub>2</sub>, (b) pure BTPH<sub>2</sub> (20 mg/L in CH<sub>3</sub>CN) under O<sub>2</sub>, (c) BTPH<sub>2</sub> (20 mg/L) and *trans*-anethole (2 mM) under N<sub>2</sub> atmosphere in CH<sub>3</sub>CN, (d) BTPH<sub>2</sub> (20 mg/L) and *trans*-anethole (2 mM) under O<sub>2</sub> atmosphere in CH<sub>3</sub>CN.

**Table S2.** Excited state life time of the measured mixtures

| Entry | Sample name                                   | Fluorescence life time (ns) | Transient life time (ns) |
|-------|-----------------------------------------------|-----------------------------|--------------------------|
| 1     | BTPH <sub>2</sub> (CH <sub>3</sub> CN)        | 12.9                        | 11.1                     |
| 2     | BTPH <sub>2</sub> + O <sub>2</sub>            | 10.7                        | 7.5                      |
| 3     | BTPH <sub>2</sub> + anethole                  | 11.5                        | 9.1                      |
| 4     | BTPH <sub>2</sub> + anethole + O <sub>2</sub> | 11.2                        | 9.4                      |

## Part F: Compound Characterization

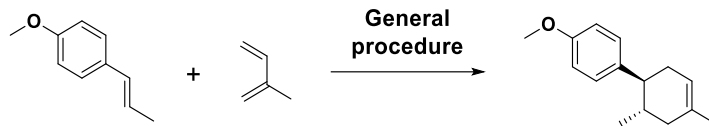

**(1S,2S)-4'-methoxy-2,4-dimethyl-1,2,3,6-tetrahydro-1,1'-biphenyl:** According to the general procedure, a dried vial with a magnetic stir bar was charged with *trans*-anethole (35.6 mg, 0.24 mmol), isoprene (240  $\mu$ l, 2.4 mmol), catalyst (2.4 mg), MgSO<sub>4</sub> (15mg) and nitromethane (2.4 mL). After the reaction was finished, the mixture was worked up according to the protocol and purified by chromatography on silica with hexane/ethyl acetate (12/1) as the elution to afford the pure cycloadduct as clear oil.

R<sub>f</sub> (hexane/ethyl acetate 12/1): 0.76

<sup>1</sup>H NMR (CDCl<sub>3</sub>, 300 MHz):  $\delta$  6.99 (d, J=9 Hz, 2H), 6.75 (d, J=9 Hz, 2H), 5.36 (bs, 1H), 3.71 (s, 3H), 2.21 (m, 1H), 2.11 (m, 1H), 2.04 (m, 1H), 1.98 (m, 1H), 1.81 (m, 1H), 1.71 (m, 1H), 1.61 (s, 3H), 0.62 (d, J=6 Hz, 3H);

<sup>13</sup>C NMR (CDCl<sub>3</sub>, 75 MHz):  $\delta$  157.8, 138.2, 133.8, 128.5, 120.9, 113.7, 55.2, 47.0, 39.9, 35.3, 34.0, 23.4, 20.2.

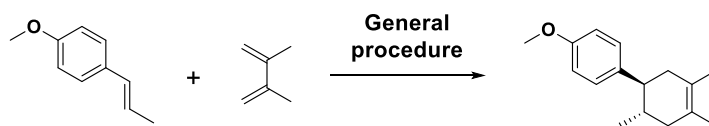

**(1S,2S)-4'-methoxy-2,4,5-trimethyl-1,2,3,6-tetrahydro-1,1'-biphenyl:** According to the general procedure, a dried vial with a magnetic stir bar was charged with *trans*-anethole (35.6 mg, 0.24 mmol), 2,3-dimethylbuta-1,3-diene (81.5  $\mu$ L, 0.72 mmol), catalyst (2.4 mg), MgSO<sub>4</sub> (15mg) and nitromethane (2.4 mL). After the reaction was finished, the mixture was worked up according to the protocol and purified by chromatography on silica with hexane/dichloromethane (1/1) as the elution to afford the pure cycloadduct as clear oil.

R<sub>f</sub> (hexane/dichloromethane 1/1): 0.81

<sup>1</sup>H NMR (CDCl<sub>3</sub>, 300 MHz):  $\delta$  7.02 (d, J=9 Hz, 2H), 6.78 (d, J=12 Hz, 2H), 3.71 (s, 3H), 2.33 (td, J=6, 12 Hz, 1H), 2.07 (m, 1H), 1.98 (m, 2H), 1.77 (m, 2H), 1.56 (s, 3H), 1.54 (s, 3H), 0.63 (d, J=9 Hz, 3H);

<sup>13</sup>C NMR (CDCl<sub>3</sub>, 75 MHz):  $\delta$  157.6, 138.2, 128.5, 125.5, 125.4, 113.7, 55.2, 47.8, 41.9, 41.7, 34.3, 20.1, 18.8, 18.7.

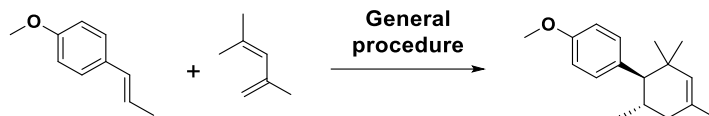

**(1R,2S)-4'-methoxy-2,4,6,6-tetramethyl-1,2,3,6-tetrahydro-1,1'-biphenyl:** According to the general procedure, a dried vial with a magnetic stir bar was charged with *trans*-anethole (35.6 mg, 0.24 mmol), 2,4-dimethylpenta-1,3-diene (93.1  $\mu$ L, 0.72 mmol), catalyst (2.4 mg),  $\text{MgSO}_4$  (15mg) and nitromethane (2.4 mL). After the reaction was finished, the mixture was worked up according to the protocol and purified by chromatography on silica with hexane/ethyl acetate (25/1) as the elution to afford the pure cycloadduct as clear oil.

$R_f$  (hexane/ethyl acetate 25/1): 0.61

$^1\text{H}$  NMR ( $\text{CDCl}_3$ , 300 MHz):  $\delta$  6.97 (dd,  $J=6, 18$  Hz, 2H), 6.76 (dd,  $J=9, 18$  Hz, 2H), 5.12 (s, 1H), 3.72 (s, 3H), 2.11 (d, 9 Hz, 1H), 2.05 (m, 1H), 1.98 (m, 1H), 1.70 (m, 1H), 1.59 (s, 3H), 0.75 (s, 3H), 0.70 (s, 3H), 0.64 (d,  $J=6$  Hz, 3H);

$^{13}\text{C}$  NMR ( $\text{CDCl}_3$ , 75 MHz):  $\delta$  157.7, 133.3, 130.3, 129.3, 113.2, 112.2, 57.4, 56.1, 40.5, 36.3, 30.0, 28.8, 24.6, 23.3, 20.8.

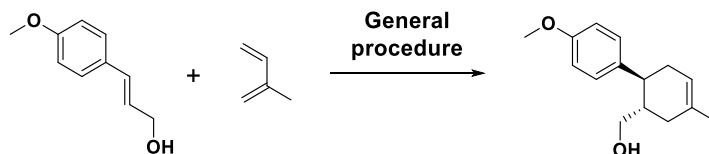

**((1S,2S)-4'-methoxy-4-methyl-1,2,3,6-tetrahydro-[1,1'-biphenyl]-2-yl)methanol:** According to the general procedure, a dried vial with a magnetic stir bar was charged with (*E*)-3-(4-methoxyphenyl)prop-2-en-1-ol (39.4 mg, 0.24 mmol), isoprene (240  $\mu$ L, 2.4 mmol), catalyst (2.4 mg),  $\text{MgSO}_4$  (15mg) and nitromethane (2.4 mL). After the reaction was finished, the mixture was worked up according to the protocol and purified by chromatography on silica with hexane/ethyl acetate (4/1) as the elution to afford the pure cycloadduct as clear oil.

$R_f$  (hexane/ethyl acetate 4/1): 0.56

$^1\text{H}$  NMR ( $\text{CDCl}_3$ , 300 MHz):  $\delta$  7.06 (d,  $J=9$  Hz, 2H), 6.78 (d,  $J=9$  Hz, 2H), 5.37 (bs, 1H), 3.70 (s, 3H), 3.33 (dd,  $J=3, 9$  Hz, 1H), 3.22 (dd, 6, 12 Hz, 1H), 2.45 (m, 1H), 2.14 (m, 1H), 2.12 (m, 1H), 2.03 (t,  $J=12$  Hz, 1H), 1.93 (m, 1H), 1.90 (m, 1H), 1.64 (s, 3H);

$^{13}\text{C}$  NMR ( $\text{CDCl}_3$ , 75 MHz):  $\delta$  158.1, 137.0, 133.4, 128.4, 120.6, 114.1, 65.9, 55.2, 42.2, 41.5, 34.7, 33.9, 23.5.

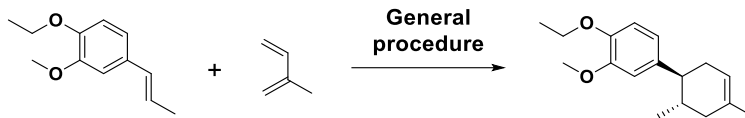

**(1S,2S)-4'-ethoxy-3'-methoxy-2,4-dimethyl-1,2,3,6-tetrahydro-1,1'-biphenyl:** According to the general procedure, a dried vial with a magnetic stir bar was charged with (E)-1-ethoxy-2-methoxy-4-(prop-1-en-1-yl)benzene (48.1 mg, 0.25 mmol), isoprene (250  $\mu$ L, 2.5 mmol), catalyst (2.4 mg),  $\text{MgSO}_4$  (15mg) and nitromethane (2.4 mL). After the reaction was finished, the mixture was worked up according to the protocol and purified by chromatography on silica with hexane/ethyl acetate (12/1) as the elution to afford the pure cycloadduct as clear oil.

$R_f$  (hexane/ethyl acetate 12/1): 0.46

$^1\text{H}$  NMR ( $\text{CDCl}_3$ , 300 MHz):  $\delta$  6.71 (m, 1H), 6.63 (m, 2H), 5.37 (bs, 1H), 4.02 (m, 2H), 3.78 (s, 3H), 2.21 (m, 1H), 2.14 (m, 1H), 2.09 (m, 1H), 1.99 (m, 1H), 1.83 (m, 1H), 1.72 (m, 1H), 1.62 (s, 3H), 1.38 (t,  $J=6$  Hz, 3H), 0.66 (d,  $J=6$  Hz, 3H);

$^{13}\text{C}$  NMR ( $\text{CDCl}_3$ , 75 MHz):  $\delta$  149.1, 146.4, 138.8, 133.8, 120.8, 119.6, 112.6, 111.0, 64.3, 55.9, 47.4, 39.8, 35.2, 34.0, 23.4, 20.2, 14.9.

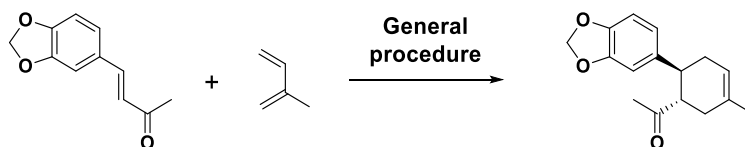

**1-((1S,6S)-6-(benzo[d][1,3]dioxol-5-yl)-3-methylcyclohex-3-en-1-yl)ethan-1-one:** According to the general procedure, a dried vial with a magnetic stir bar was charged with (E)-4-(benzo[d][1,3]dioxol-5-yl)but-3-en-2-one (45.6 mg, 0.24 mmol), isoprene (240  $\mu$ L, 2.4 mmol), catalyst (2.4 mg),  $\text{MgSO}_4$  (15mg) and nitromethane (2.4 mL). After the reaction was finished, the mixture was worked up according to the protocol and purified by chromatography on silica with hexane/ethyl acetate (10/1) as the elution to afford the pure cycloadduct as clear oil.

$R_f$  (hexane/ethyl acetate 10/1): 0.36

$^1\text{H}$  NMR ( $\text{CDCl}_3$ , 300 MHz):  $\delta$  6.72 (d,  $J=9$  Hz, 1H), 6.70 (d,  $J=1.6$  Hz, 1H), 6.67 (dd,  $J=3, 9$  Hz, 1H), 5.93 (s, 2H), 5.48 (m, 1H), 2.99 (dt,  $J=5.3, 10.3$  Hz, 1H), 2.87 (dt,  $J=5.4, 11$  Hz, 1H), 2.31 (m, 1H), 2.26 (m, 1H), 2.17 (m, 1H), 2.07 (m, 1H), 1.90 (s, 3H), 1.73 (s, 3H);

$^{13}\text{C}$  NMR ( $\text{CDCl}_3$ , 75 MHz):  $\delta$  212.0, 147.7, 146.1, 138.0, 132.1, 120.6, 120.5, 108.3, 107.7, 100.9, 53.7, 42.5, 34.2, 33.3, 29.8, 23.2.

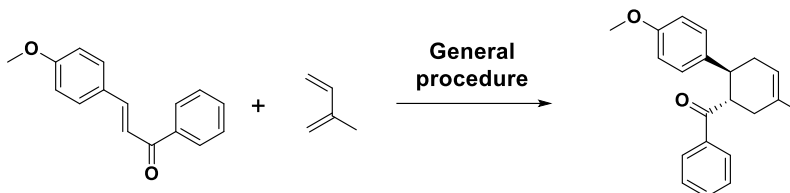

**((1S,2S)-4'-methoxy-4-methyl-1,2,3,6-tetrahydro-[1,1'-biphenyl]-2-yl)(phenyl)methanone:**

According to the general procedure, a dried vial with a magnetic stir bar was charged with (E)-3-(4-methoxyphenyl)-1-phenylprop-2-en-1-one (57.2 mg, 0.24 mmol), isoprene (240  $\mu\text{L}$ , 2.4 mmol), catalyst (2.4 mg),  $\text{MgSO}_4$  (15mg) and nitromethane (2.4 mL). After the reaction was finished, the mixture was worked up according to the protocol and purified by chromatography on silica with hexane/dichloromethane (1/1) as the elution to afford the pure cycloadduct as clear oil.

$R_f$  (hexane/dichloromethane 1/1): 0.28

$^1\text{H}$  NMR ( $\text{CDCl}_3$ , 300 MHz):  $\delta$  7.84 (d,  $J=7.4$  Hz, 2H), 7.50 (t,  $J=6.8$  Hz, 1H), 7.39 (t,  $J=7.5$  Hz, 2H), 7.13 (d,  $J=8.5$  Hz, 2H), 6.72 (d,  $J=8.4$  Hz, 2H), 5.56 (bs, 1H), 3.98 (m, 1H), 3.71 (s, 3H), 3.22 (m, 1H), 2.34 (m, 4H), 1.74 (s, 3H);

$^{13}\text{C}$  NMR ( $\text{CDCl}_3$ , 75 MHz):  $\delta$  203.8, 157.8, 137.4, 136.5, 132.7, 132.5, 128.41, 128.38, 128.0, 121.0, 113.7, 55.1, 47.4, 41.6, 35.2, 34.2, 23.2.

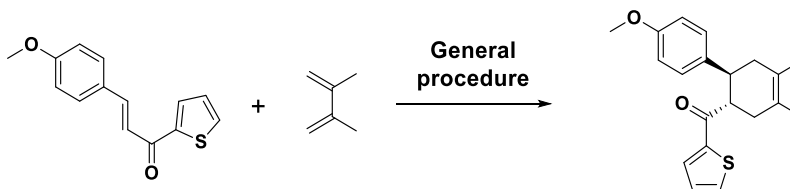

**((1S,2S)-4'-methoxy-4,5-dimethyl-1,2,3,6-tetrahydro-[1,1'-biphenyl]-2-yl)(thiophen-2-yl)methanone:**

According to the general procedure, a dried vial with a magnetic stir bar was charged with (E)-3-(4-methoxyphenyl)-1-(thiophen-2-yl)prop-2-en-1-one (58.6 mg, 0.24 mmol), 2,3-dimethylbuta-1,3-diene (271.6  $\mu\text{L}$ , 2.4 mmol), catalyst (2.4 mg),  $\text{MgSO}_4$  (15mg) and nitromethane (2.4 mL). After the reaction was finished, the mixture was worked up according to the protocol and purified by chromatography on silica with hexane/ethyl acetate (4/1) as the elution to afford the pure cycloadduct as clear oil.

$R_f$  (hexane/ethyl acetate 4/1): 0.61

$^1\text{H}$  NMR ( $\text{CDCl}_3$ , 300 MHz):  $\delta$  7.54 (d,  $J=4.1$  Hz, 2H), 7.10 (d,  $J=8.2$  Hz, 2H), 7.00 (t,  $J=4.1$  Hz, 1H), 6.79 (d,  $J=8.5$  Hz, 2H), 4.77 (d,  $J=15$  Hz, 2H), 3.92 (m, 2H), 3.72 (s, 3H), 2.41 (t,  $J=9.7$  Hz 1H), 2.02 (t,  $J=10$  Hz, 1H), 1.65 (s, 3H), 1.07 (s, 3H);

$^{13}\text{C}$  NMR ( $\text{CDCl}_3$ , 75 MHz):  $\delta$  193.4, 158.2, 152.5, 143.8, 133.6, 131.9, 131.7, 129.3, 128.1, 113.5, 108.7, 55.2, 48.7, 45.0, 42.0, 35.0, 21.9, 18.8.

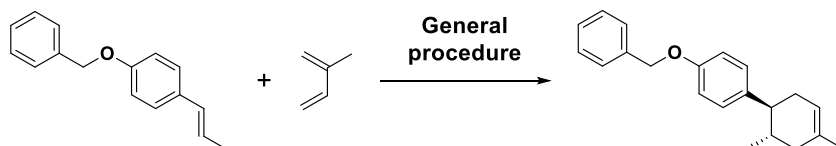

**(1S,2S)-4'-(benzyloxy)-2,4-dimethyl-1,2,3,6-tetrahydro-1,1'-biphenyl:** According to the general procedure, a dried vial with a magnetic stir bar was charged with (E)-1-(benzyloxy)-4-(prop-1-en-1-yl)benzene (53.8 mg, 0.24 mmol), isoprene (240  $\mu\text{L}$ , 2.4 mmol), catalyst (2.4 mg),  $\text{MgSO}_4$  (15mg) and nitromethane (2.4 mL). After the reaction was finished, the mixture was worked up according to the protocol and purified by chromatography on silica with hexane/ethyl acetate (8/1) as the elution to afford the pure cycloadduct as clear oil.

$R_f$  (hexane/ethyl acetate 8/1): 0.37

$^1\text{H}$  NMR ( $\text{CDCl}_3$ , 300 MHz)  $\delta$  7.42 (m, 5H), 7.13 (d, 2H), 6.96 (d, 2H), 5.49 (s, 1H), 5.08 (s, 2H), 2.34 (m, 1H), 2.23 (m, 2H), 2.13 (m, 1H), 1.94 (m, 1H), 1.86 (m, 1H), 1.74 (s, 3H), 0.76 (d, 3H).

$^{13}\text{C}$  NMR ( $\text{CDCl}_3$ , 75 MHz)  $\delta$  157.18, 138.56, 137.39, 133.87, 128.63, 127.97, 127.62, 121.01, 114.73, 70.12, 47.07, 39.94, 35.36, 34.04, 30.99, 23.50, 20.37.

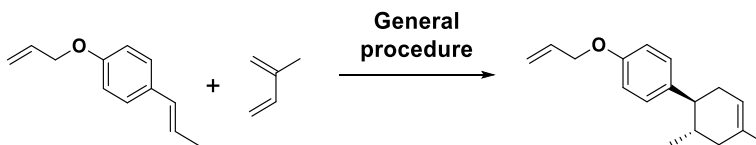

**(1S,2S)-4'-(allyloxy)-2,4-dimethyl-1,2,3,6-tetrahydro-1,1'-biphenyl:** According to the general procedure, a dried vial with a magnetic stir bar was charged with (E)-1-(allyloxy)-4-(prop-1-en-1-yl)benzene (41.8 mg, 0.24 mmol), isoprene (240  $\mu\text{L}$ , 2.4 mmol), catalyst (2.4 mg),  $\text{MgSO}_4$  (15mg) and nitromethane (2.4 mL). After the reaction was finished, the mixture was worked up according to the protocol and purified by chromatography on silica with hexane/ethyl acetate (8/1) as the elution to afford the pure cycloadduct as clear oil.

$R_f$  (hexane/ethyl acetate 8/1): 0.32

$^1\text{H}$  NMR ( $\text{CDCl}_3$ , 300 MHz)  $\delta$  7.11 (d, 2H), 6.89 (d, 2H), 6.10 (m, 1H), 5.44 (d, 2H), 5.30 (d, 2H), 4.55 (d, 2H), 2.33 (m, 1H), 2.22 (m, 2H), 2.12 (m, 1H), 1.91 (m, 1H), 1.85 (m, 1H), 1.73 (s, 3H), 0.74 (d, 3H).

$^{13}\text{C}$  NMR ( $\text{CDCl}_3$ , 75 MHz)  $\delta$  156.88, 138.37, 133.64, 128.51, 120.96, 117.45, 114.56, 68.85, 47.00, 39.89, 35.29, 34.00, 30.91, 23.43, 20.28.

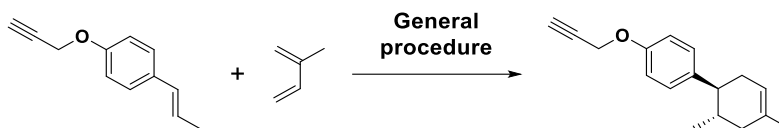

**(1S,2S)-2,4-dimethyl-4'-(prop-2-yn-1-yloxy)-1,2,3,6-tetrahydro-1,1'-biphenyl:** According to the general procedure, a dried vial with a magnetic stir bar was charged with (E)-1-(prop-1-en-1-yl)-4-(prop-2-yn-1-yloxy)benzene (41.3 mg, 0.24 mmol), isoprene (240  $\mu\text{L}$ , 2.4 mmol), catalyst (2.4 mg),  $\text{MgSO}_4$  (15mg) and nitromethane (2.4 mL). After the reaction was finished, the mixture was worked up according to the protocol and purified by chromatography on silica with hexane/ethyl acetate (8/1) as the elution to afford the pure cycloadduct as clear oil.

$R_f$  (hexane/ethyl acetate 8/1): 0.30

$^1\text{H}$  NMR ( $\text{CDCl}_3$ , 300 MHz)  $\delta$  7.10 (d, 2H), 6.92 (d, 2H), 5.45 (s, 1H), 4.68 (d, 2H), 2.52 (s, 1H), 2.31 (m, 1H), 2.20 (m, 2H), 2.10 (m, 1H), 1.91 (m, 1H), 1.82 (m, 1H), 1.70 (s, 3H), 0.72 (d, 3H).

$^{13}\text{C}$  NMR ( $\text{CDCl}_3$ , 75 MHz)  $\delta$  155.95, 139.28, 133.93, 128.65, 120.98, 114.81, 79.01, 75.44, 55.99, 47.10, 39.93, 35.33, 34.05, 23.51, 20.37.

# <sup>1</sup>H and <sup>13</sup>C NMR spectra

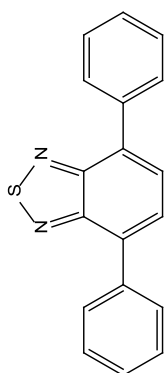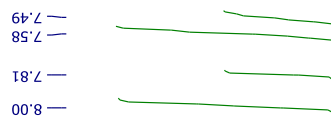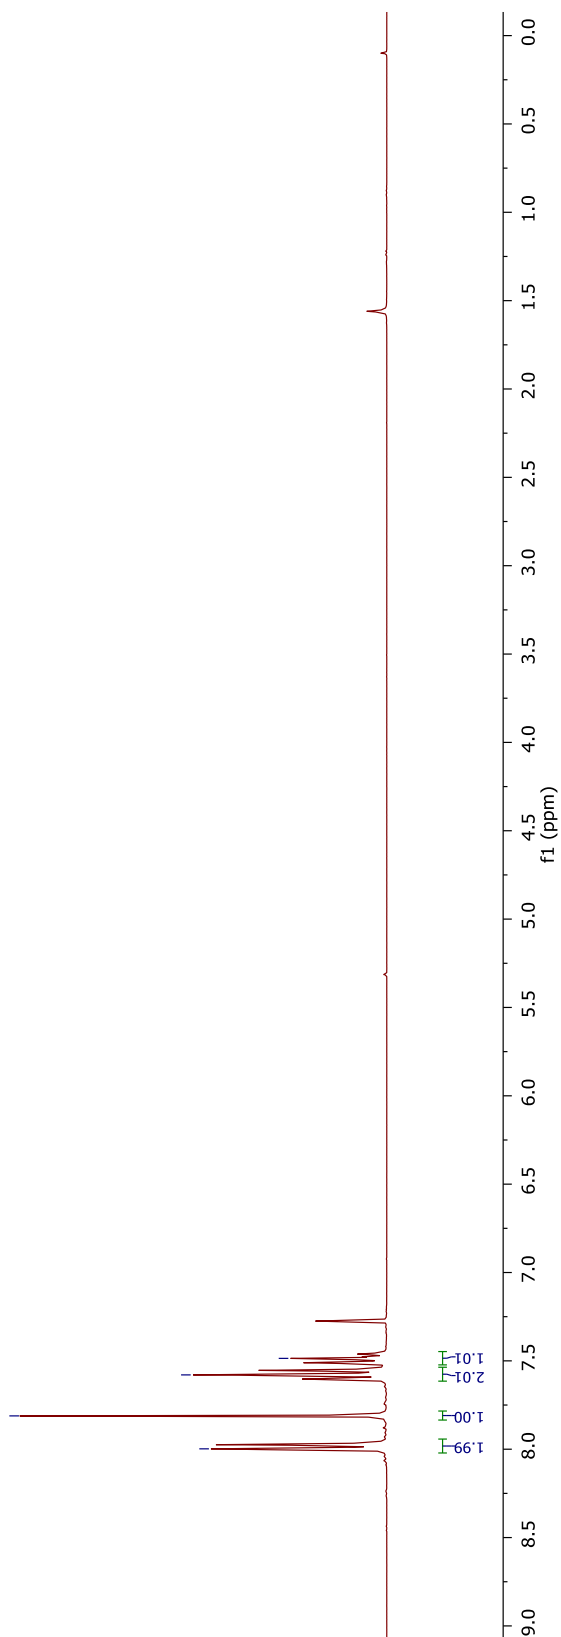



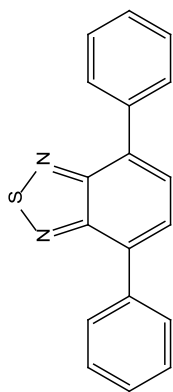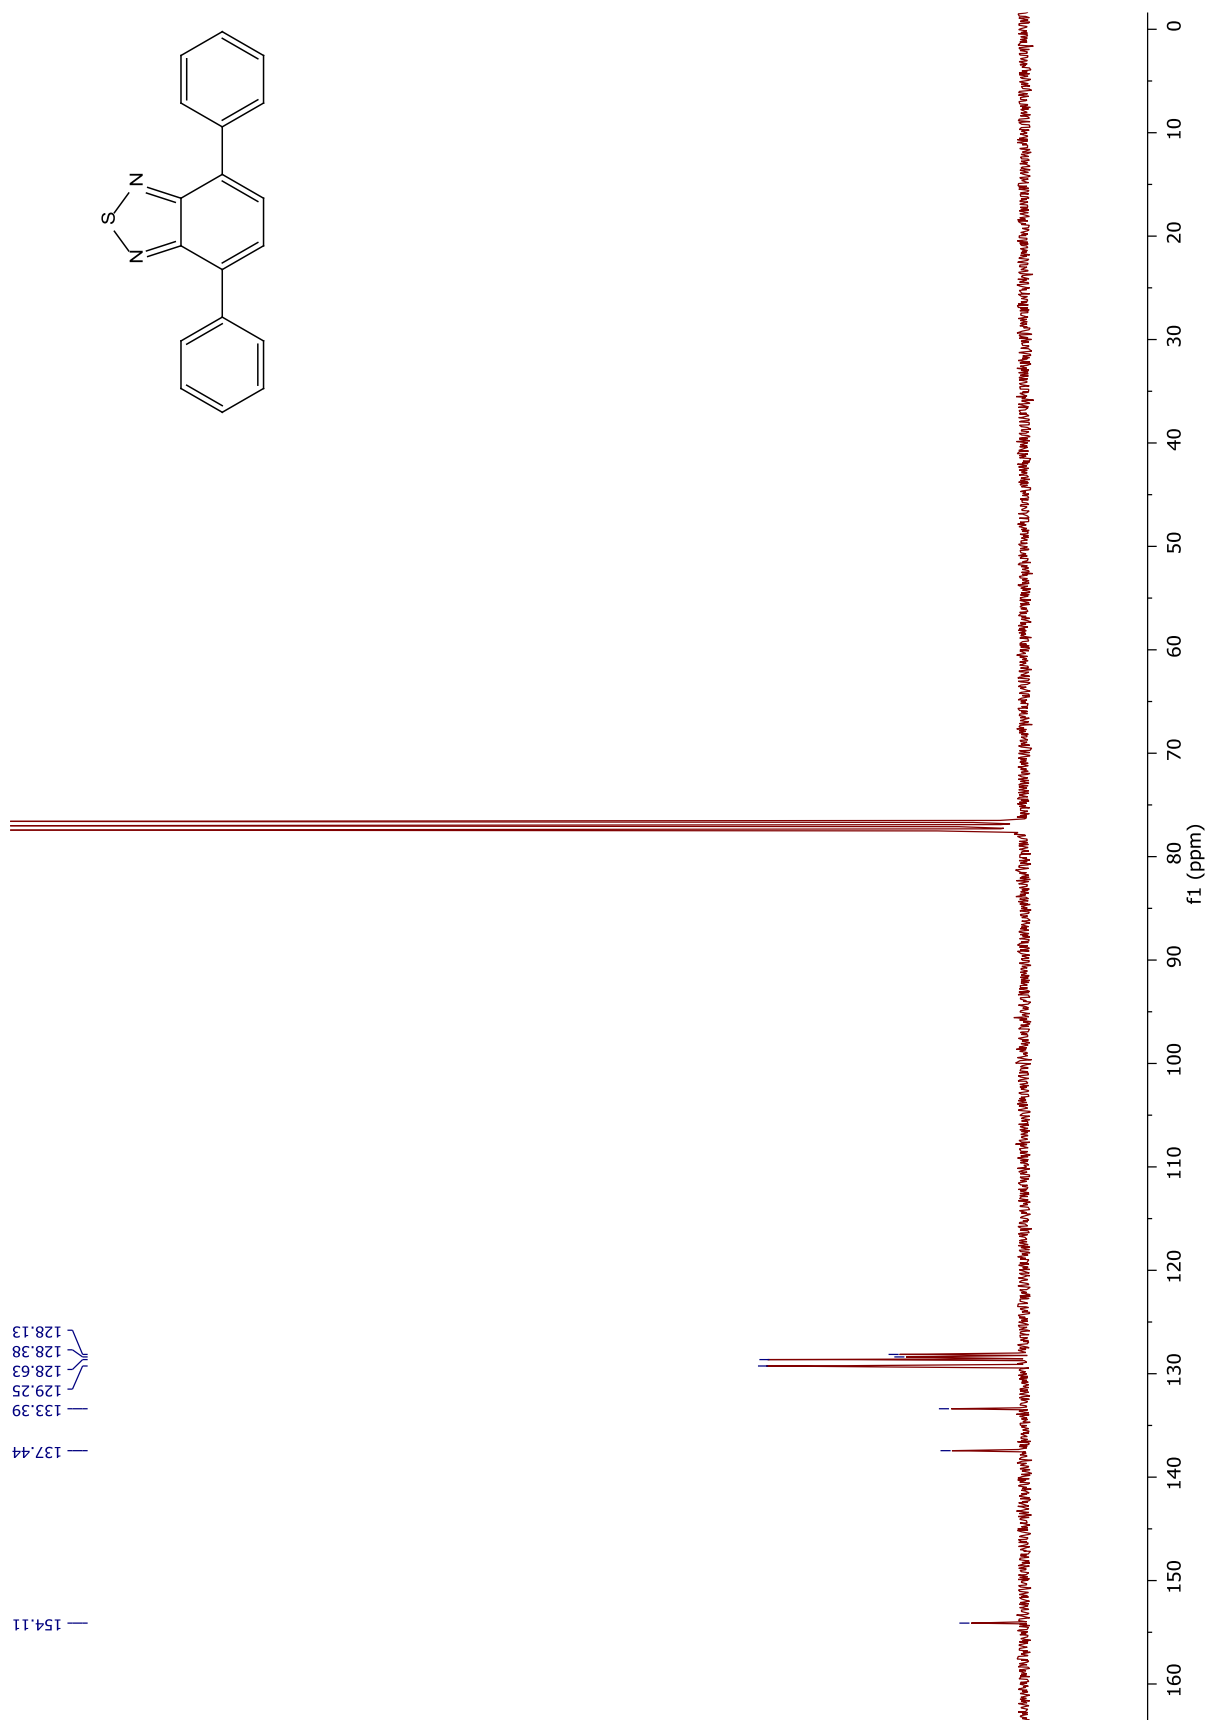

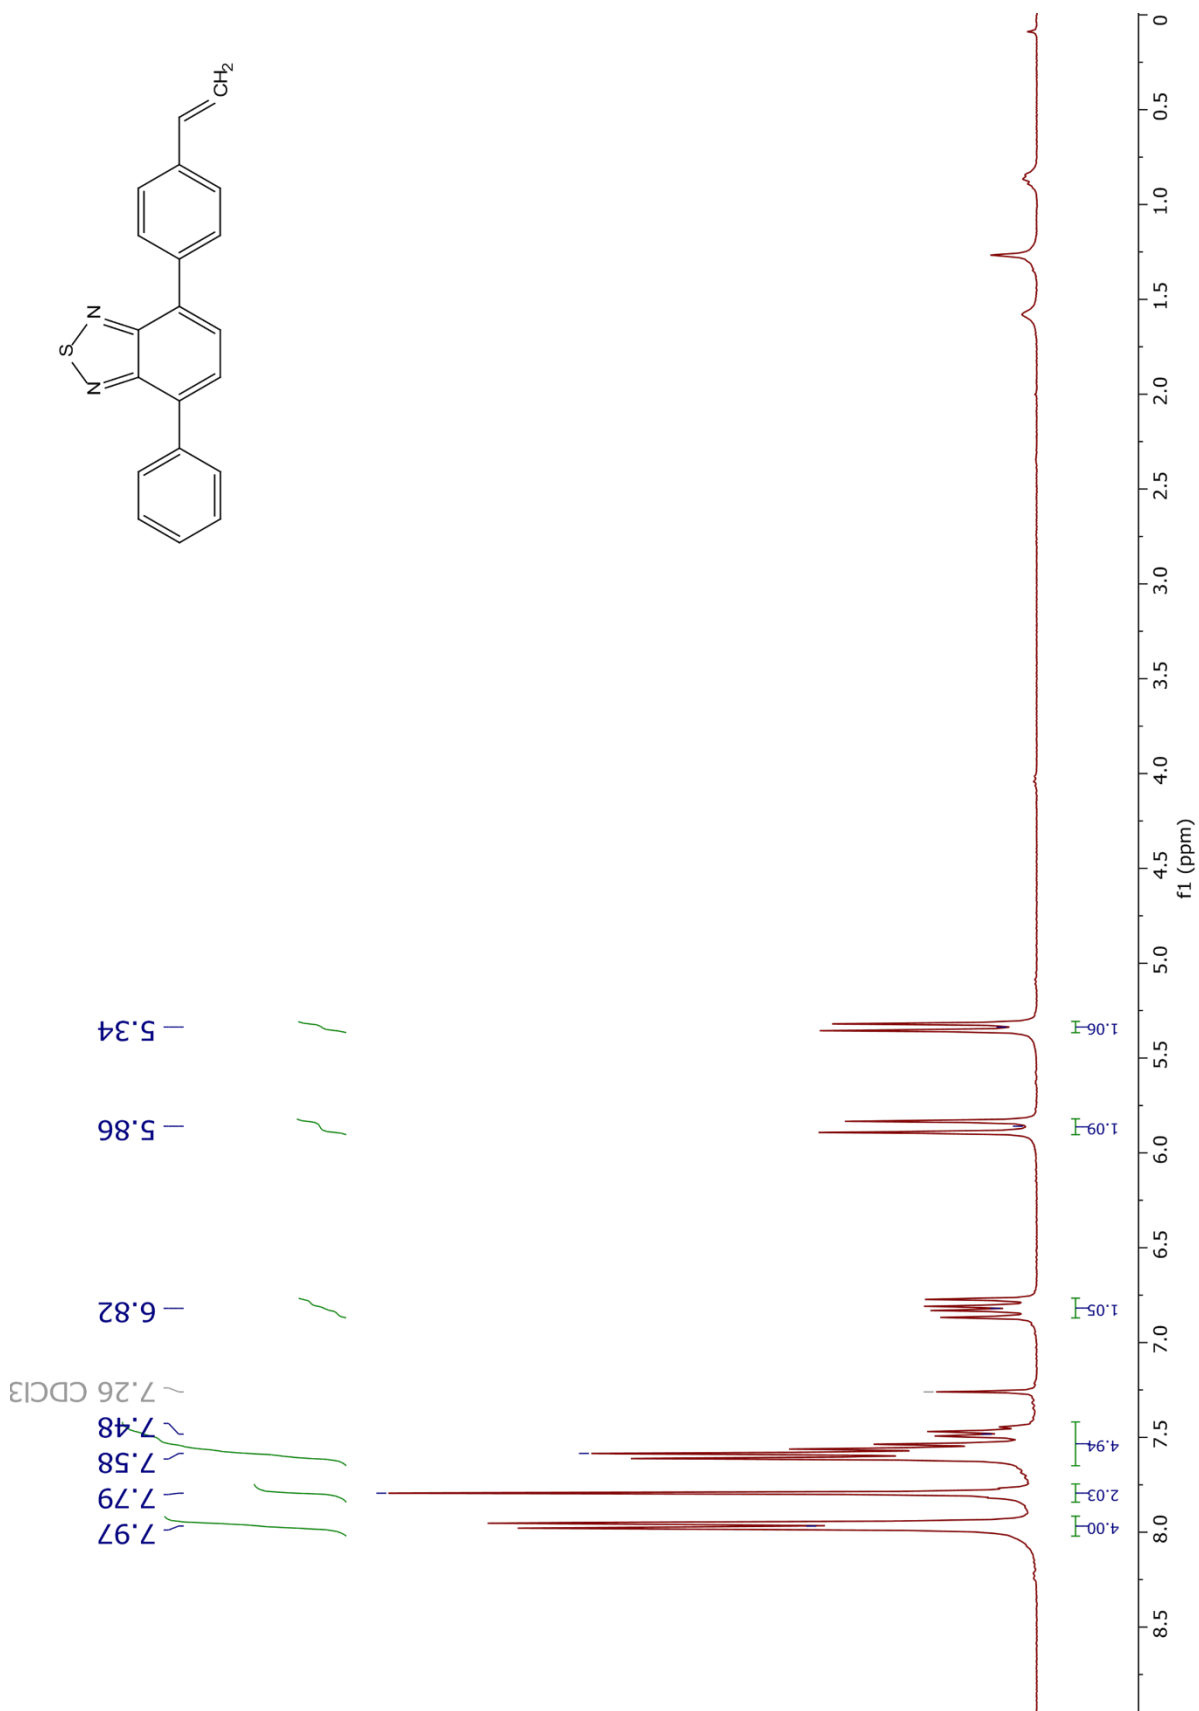

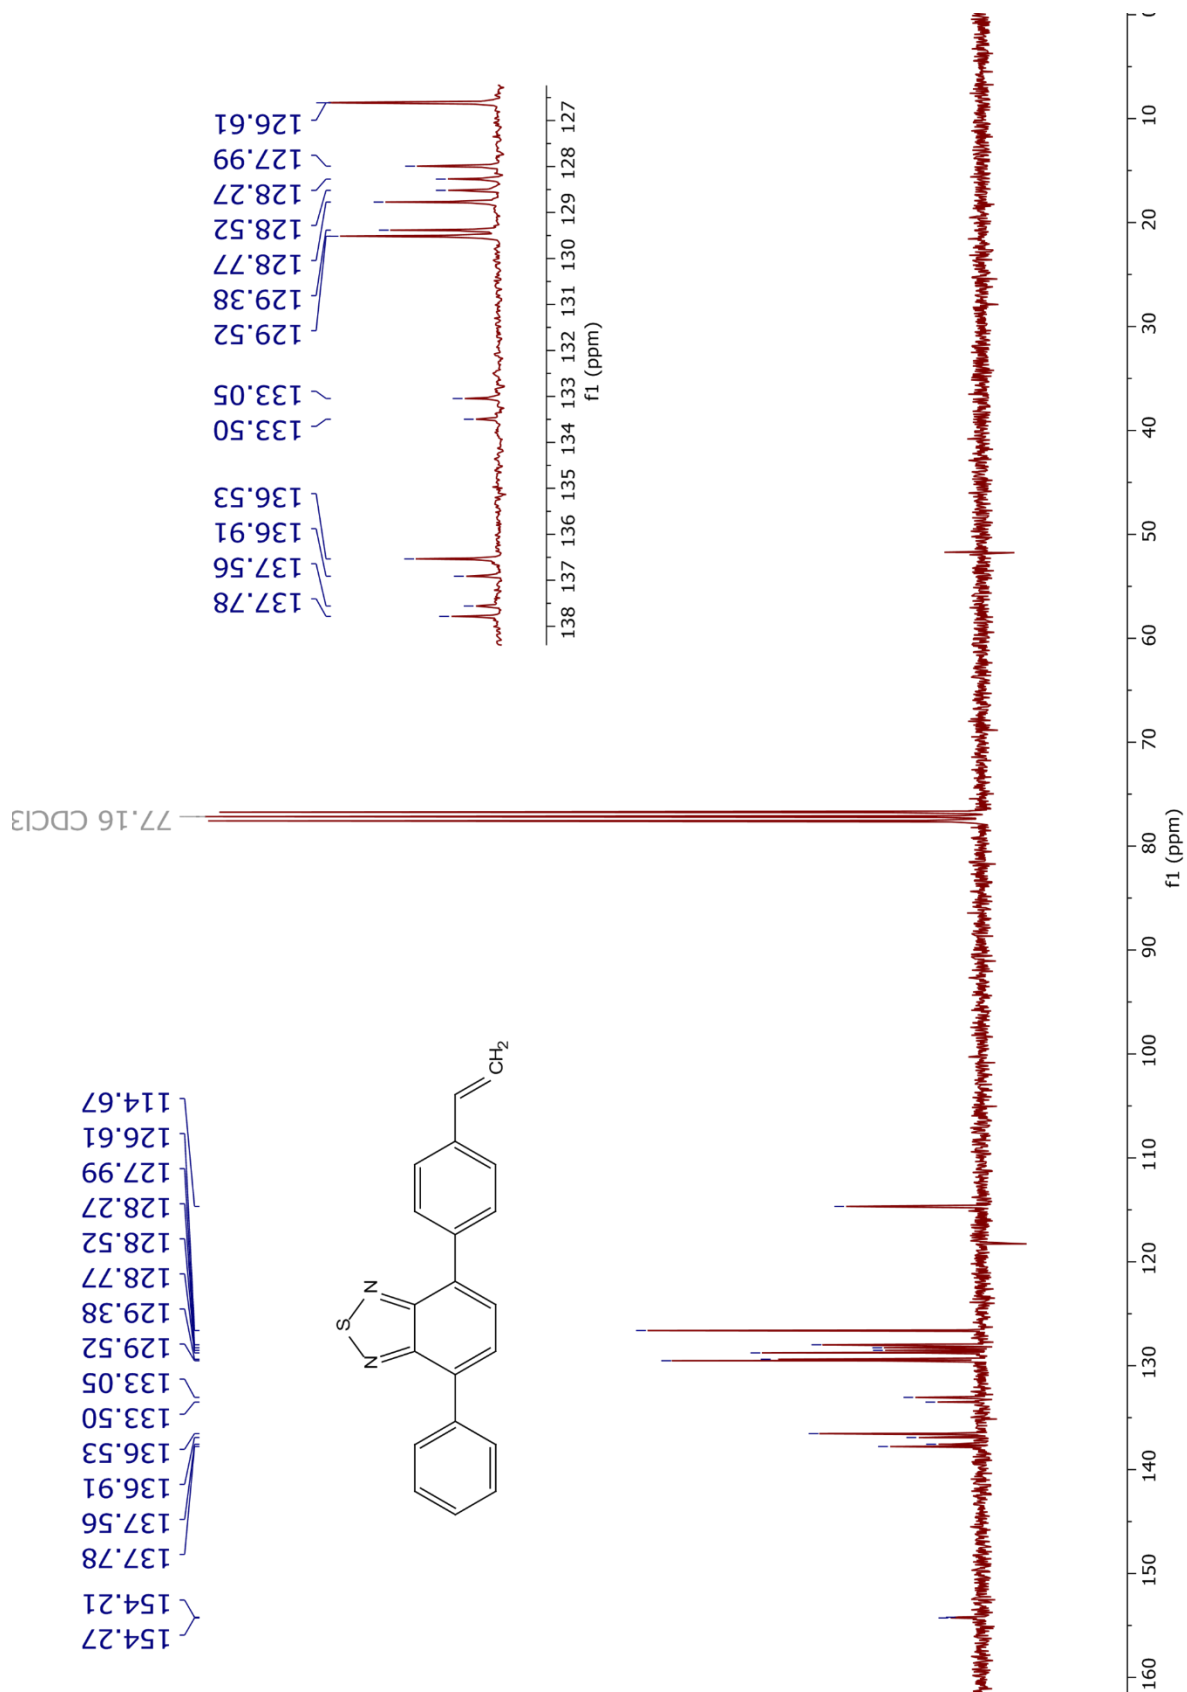

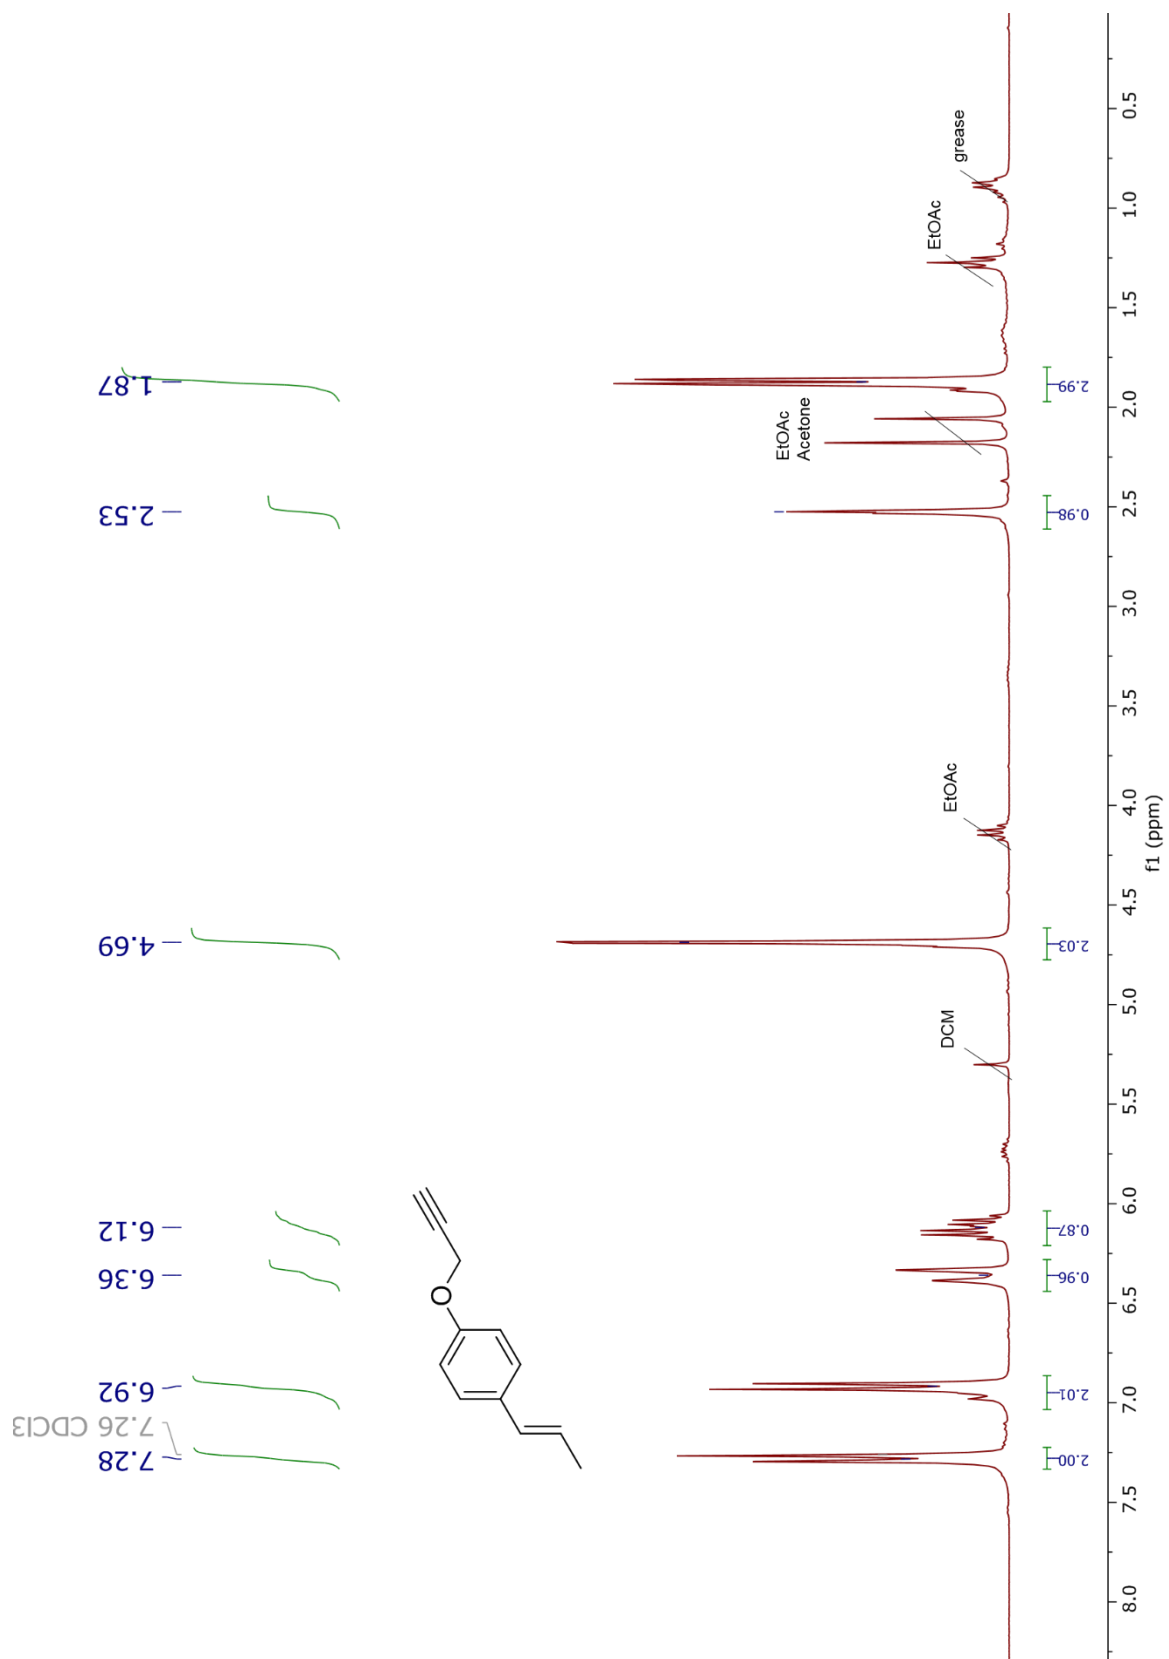

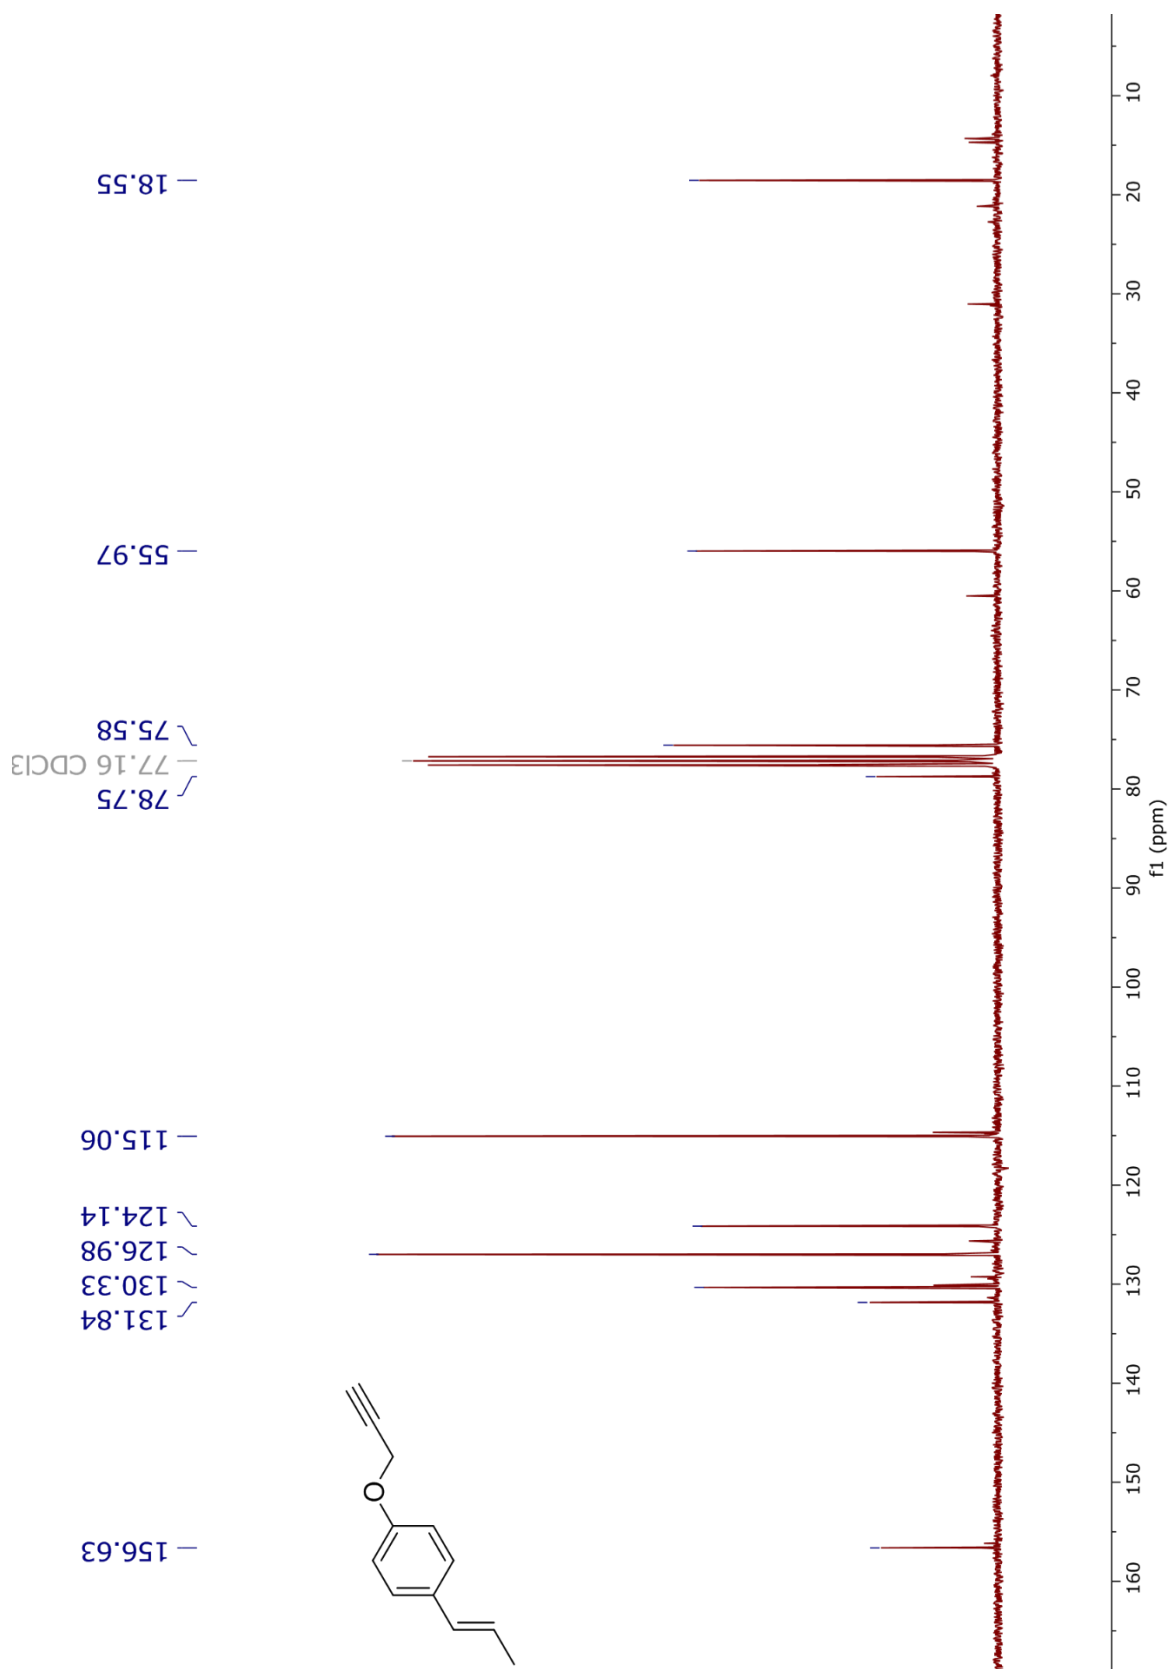

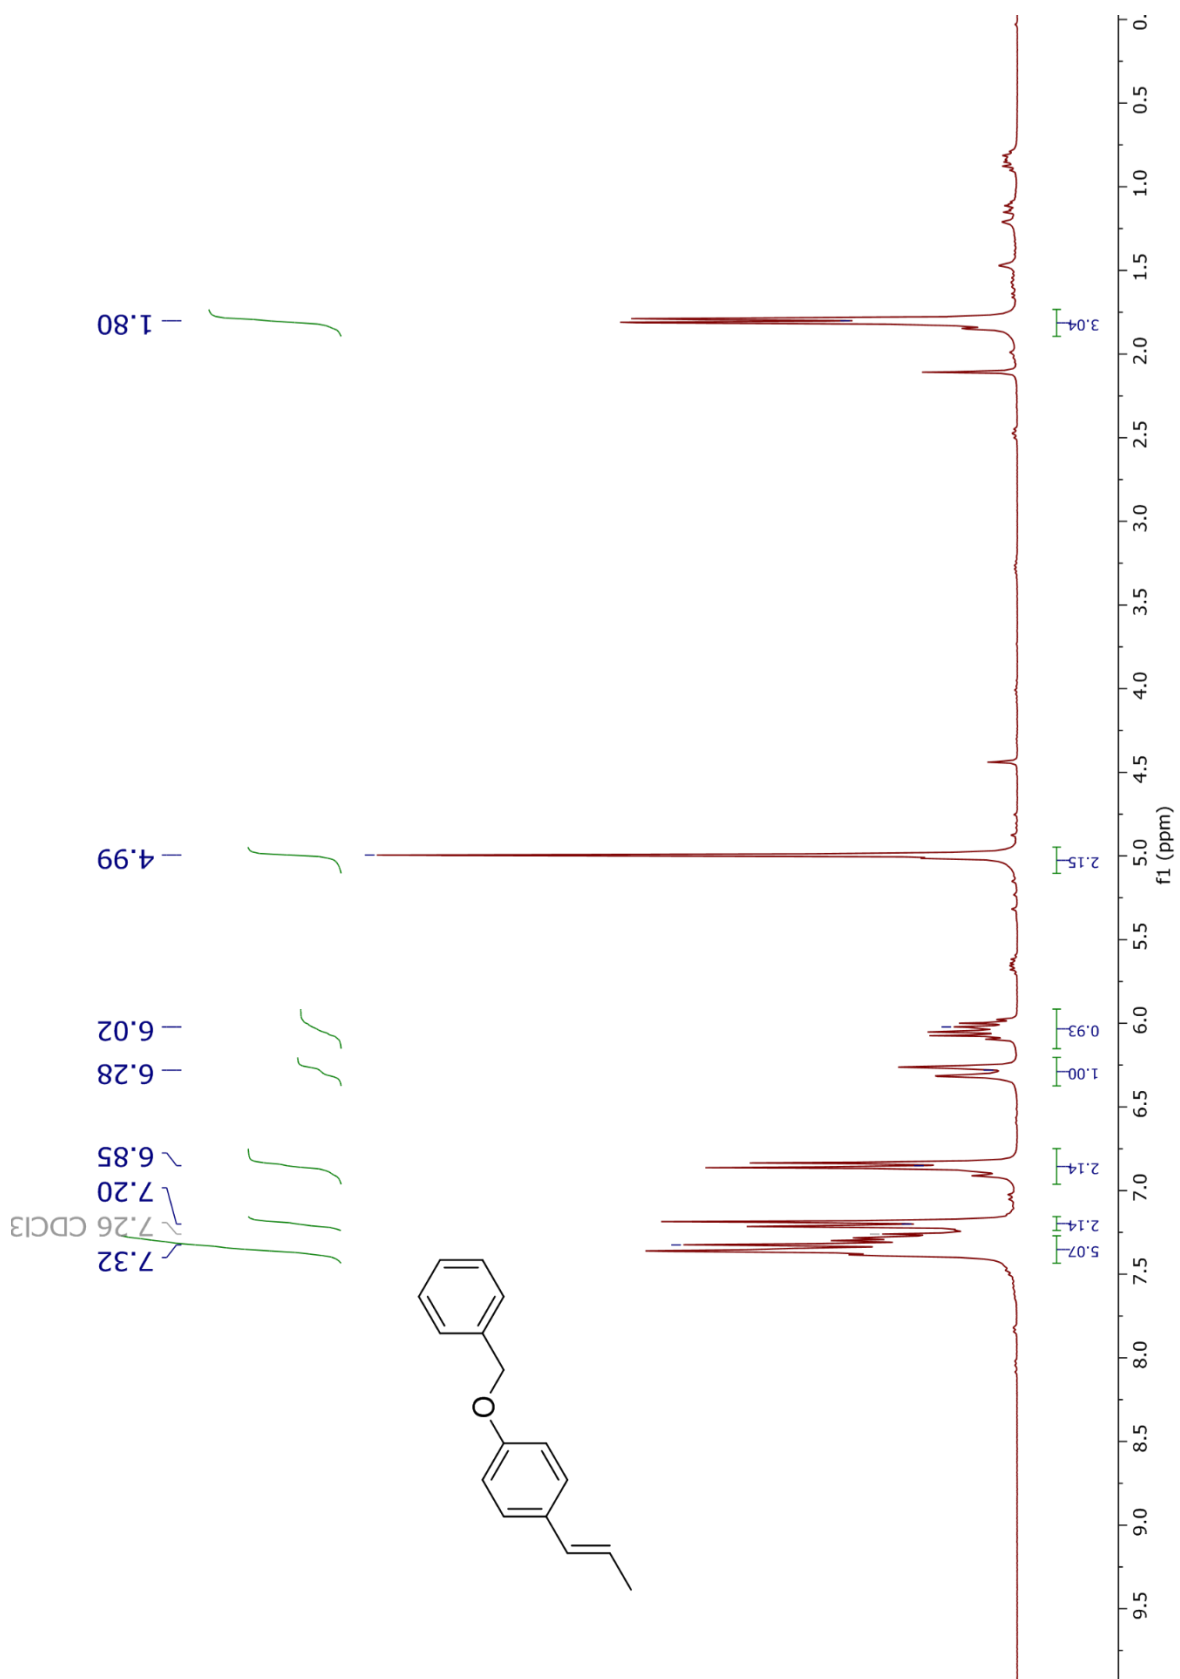

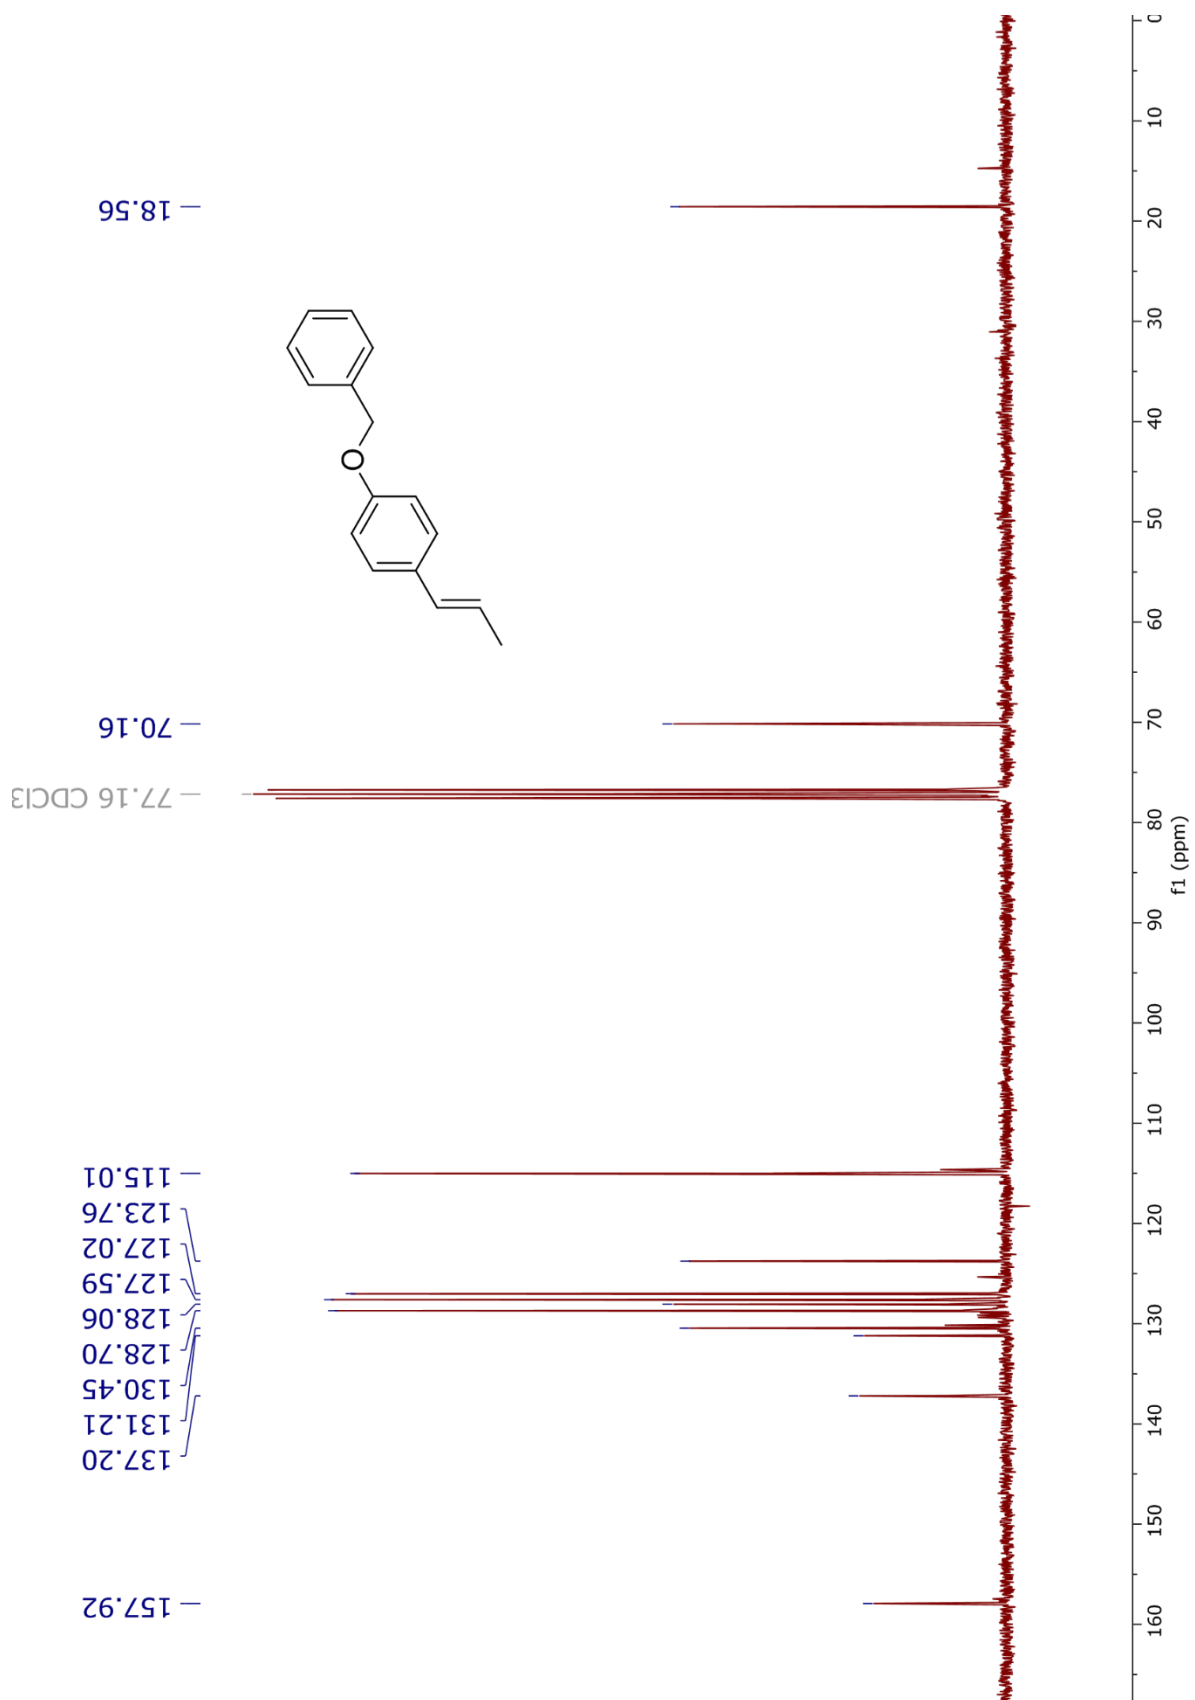

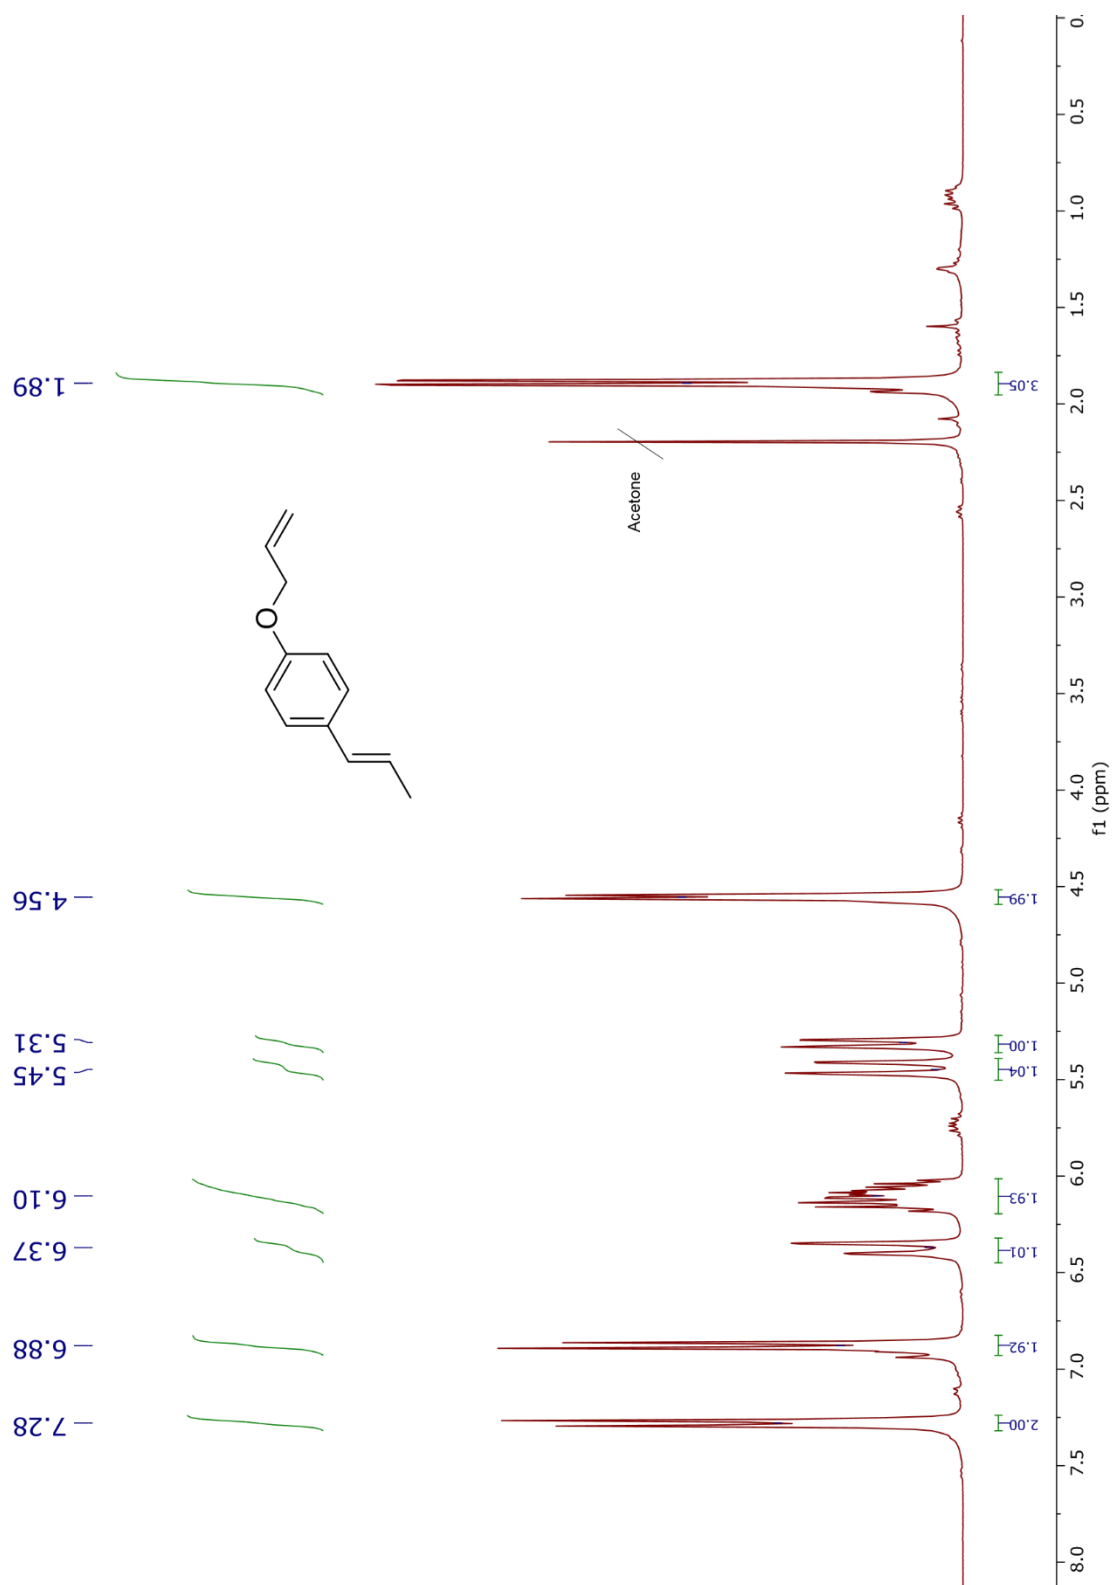



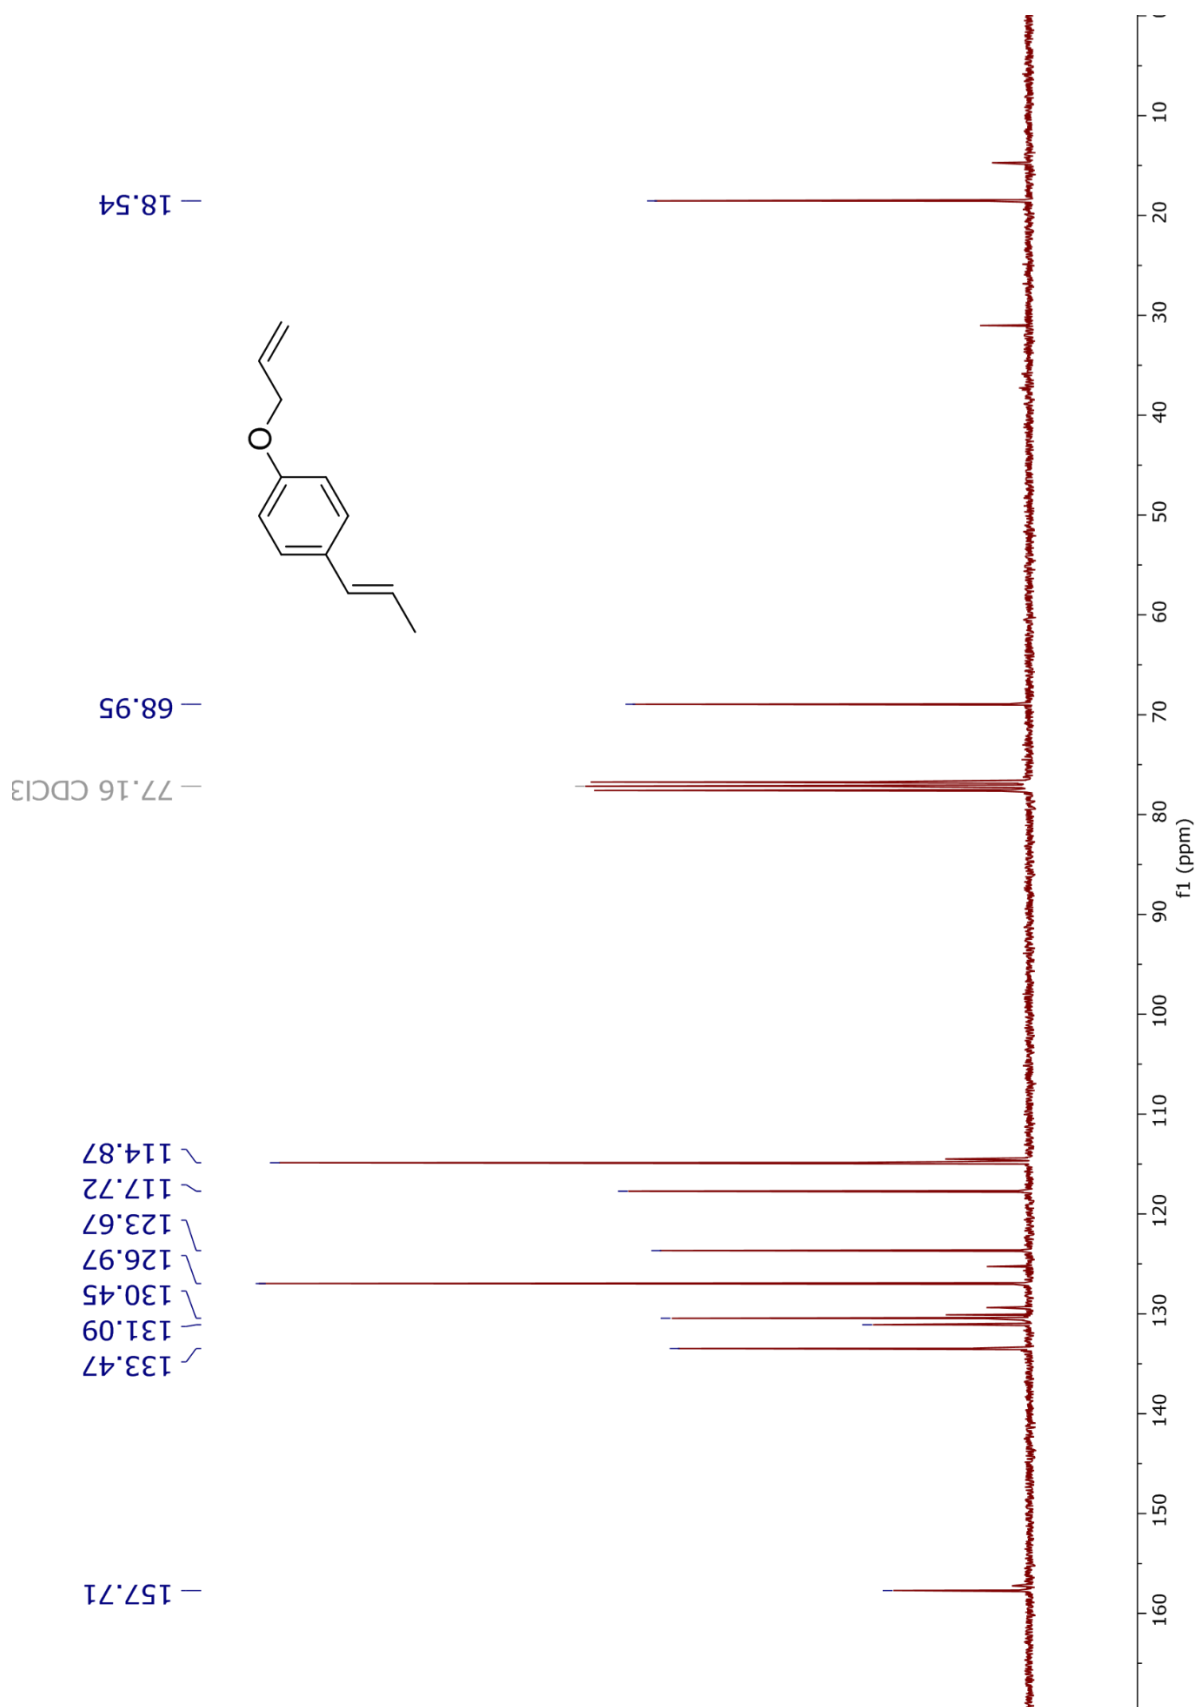

lirun, S#1  
 (1S,2S)-4-(4-methoxy-2,4-dimethyl-1,2,3,6-tetrahydronaphthalen-1-yl)-biphenyl

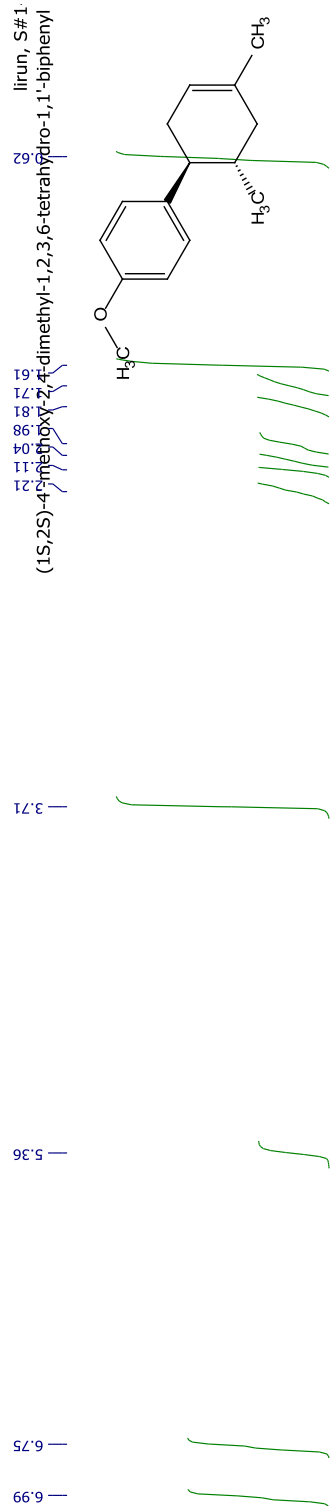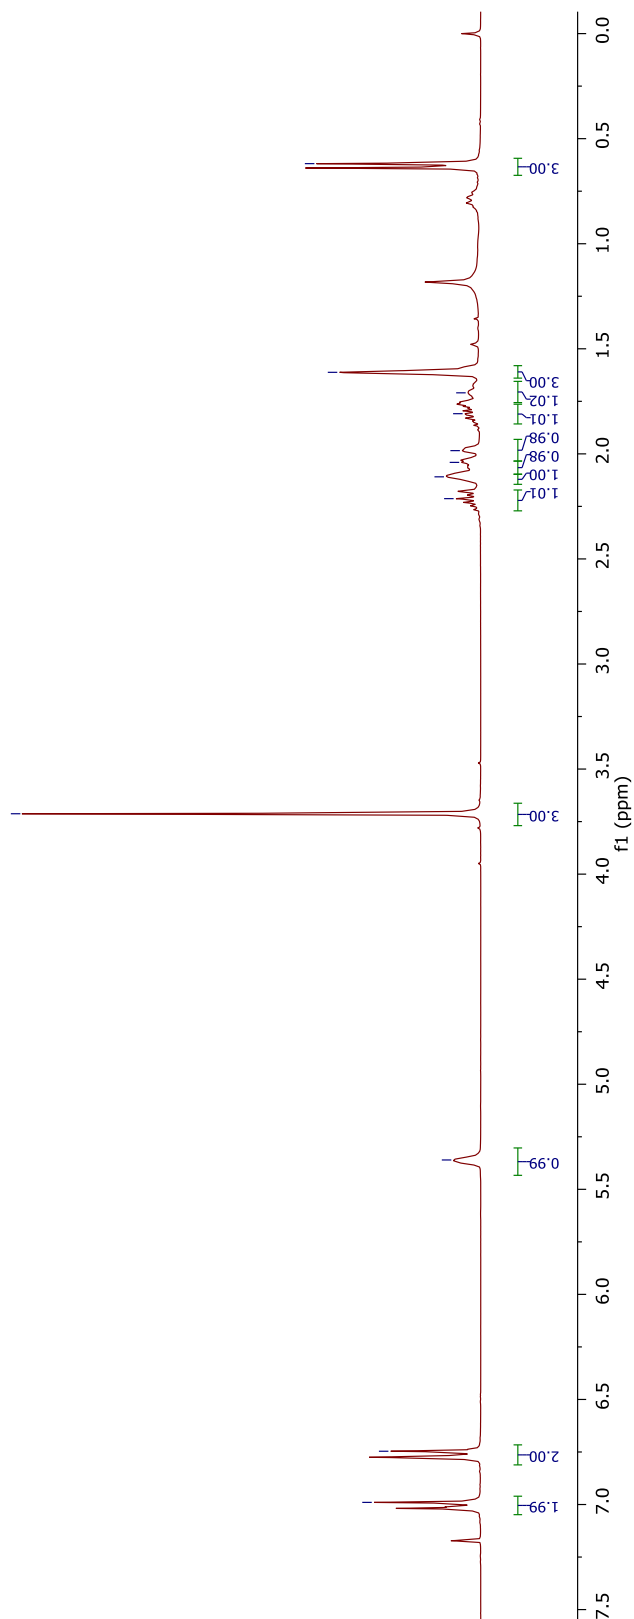

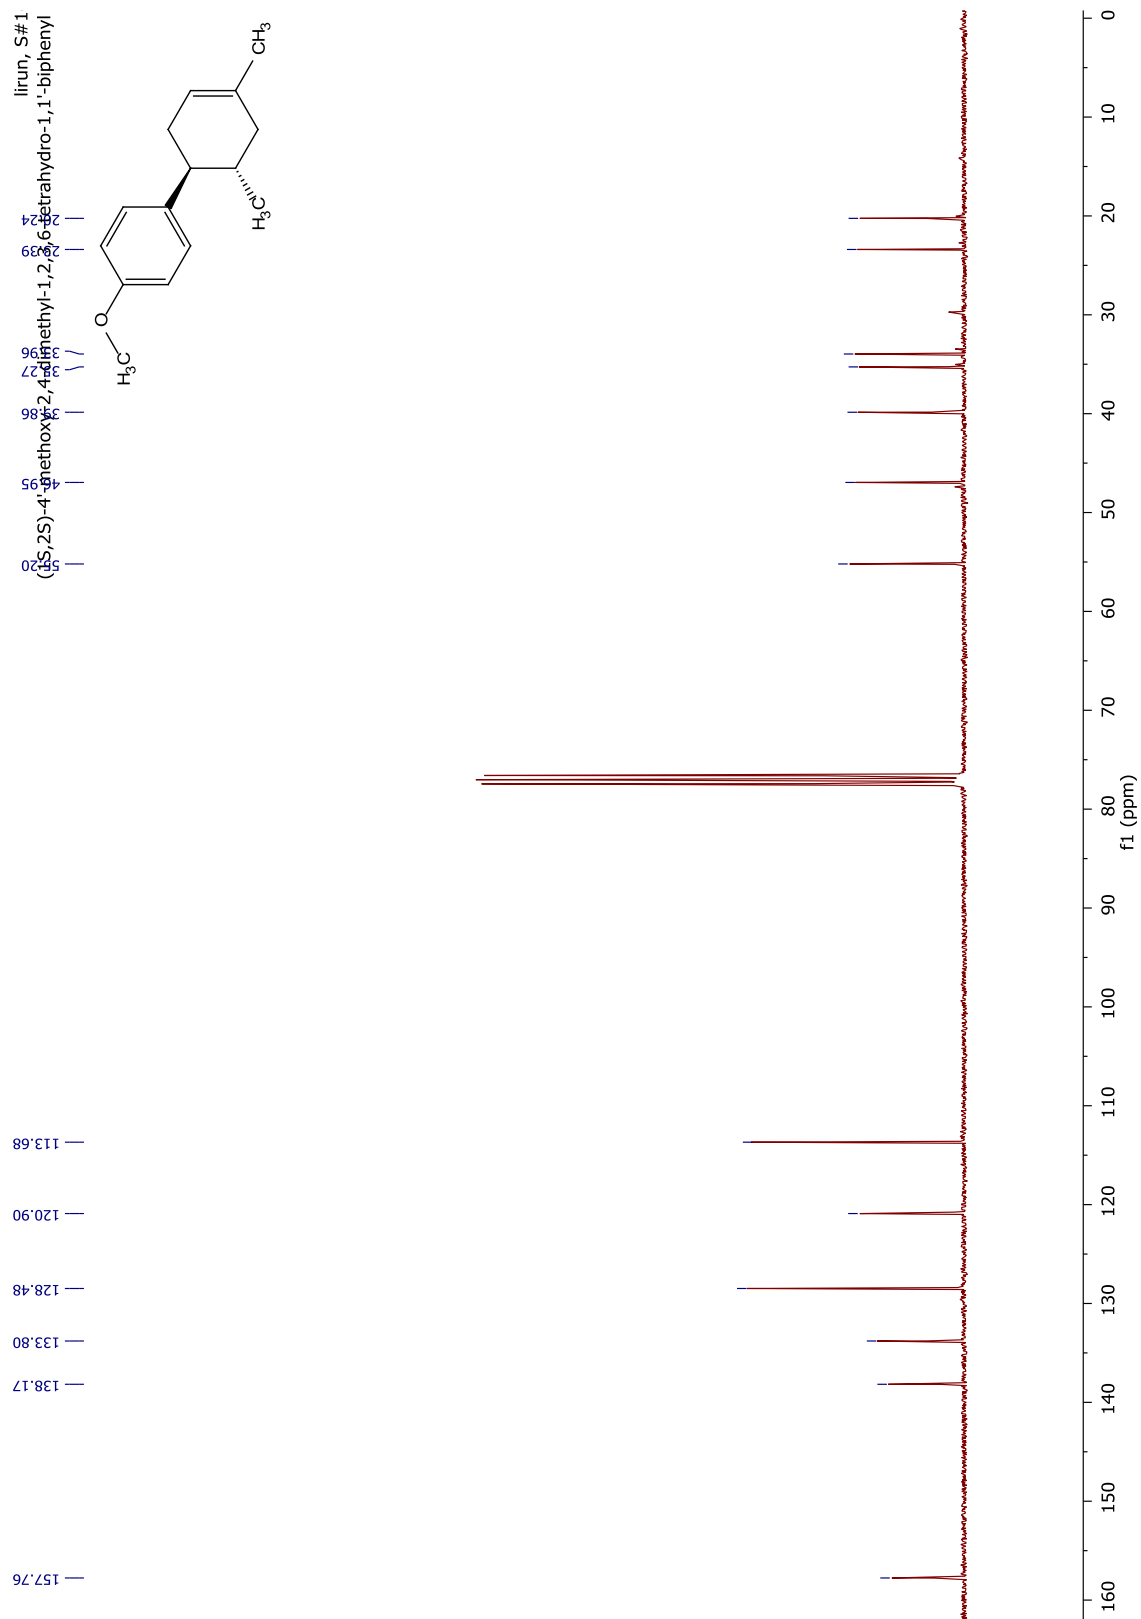

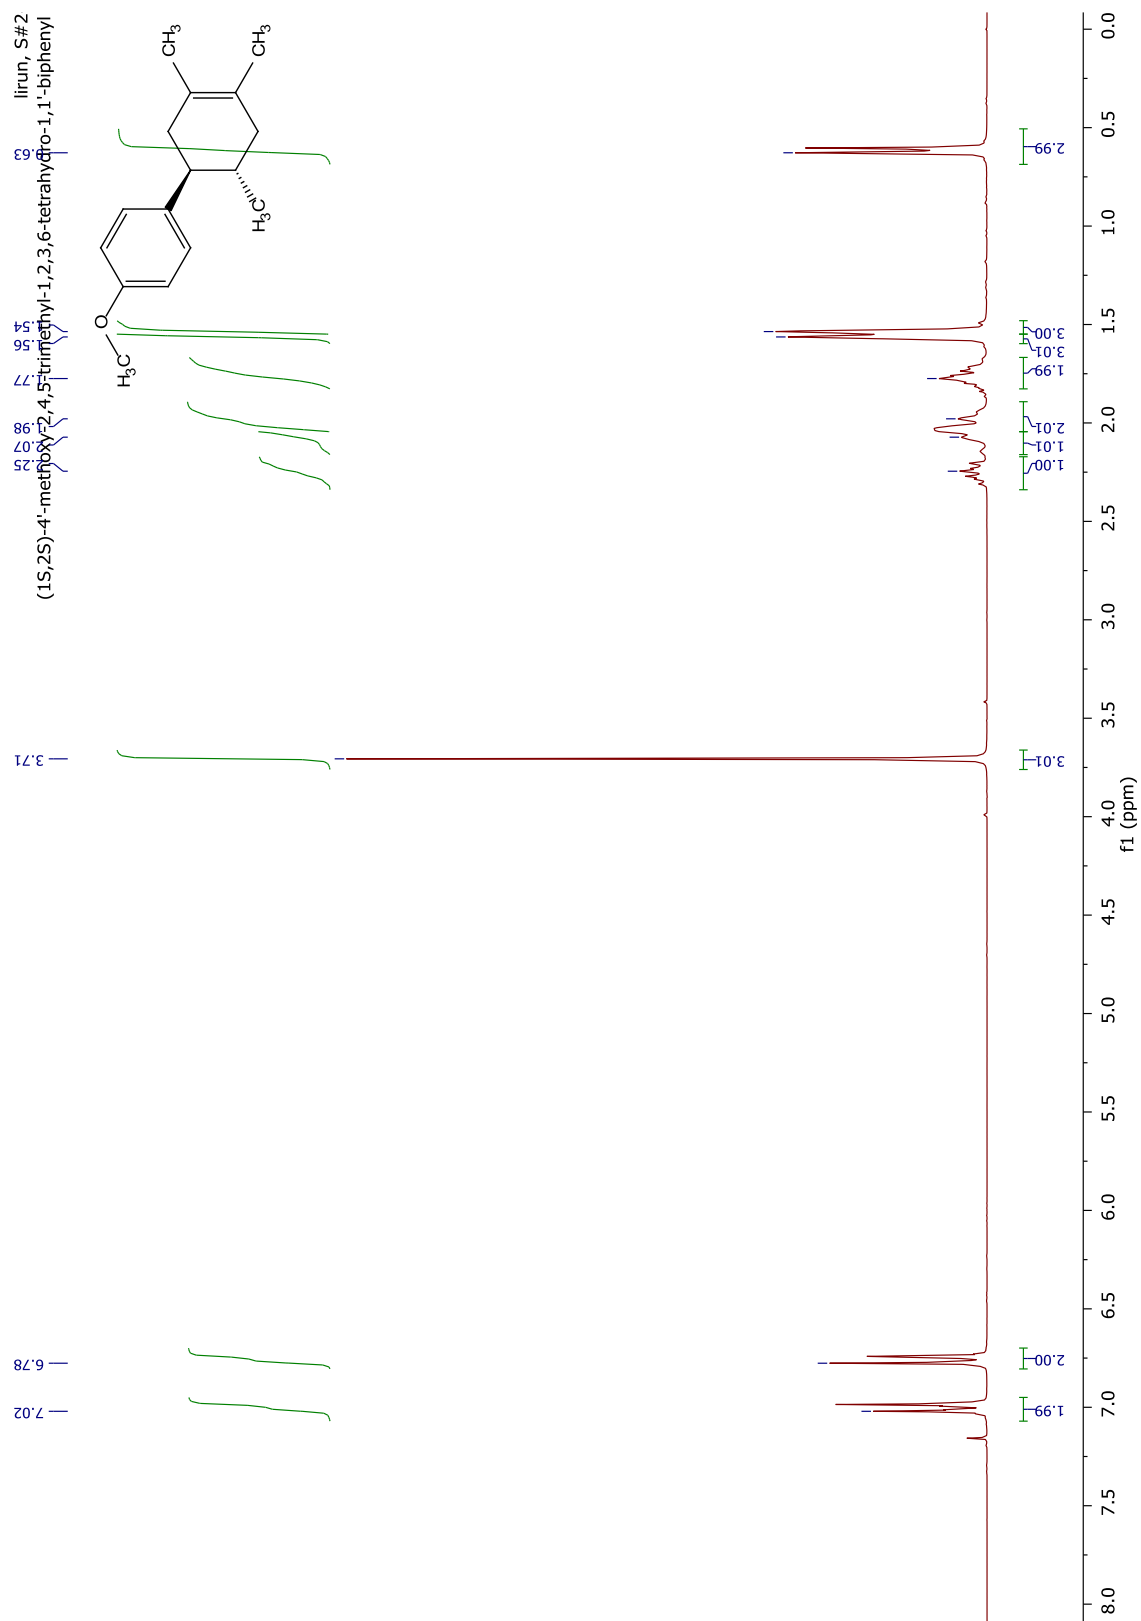

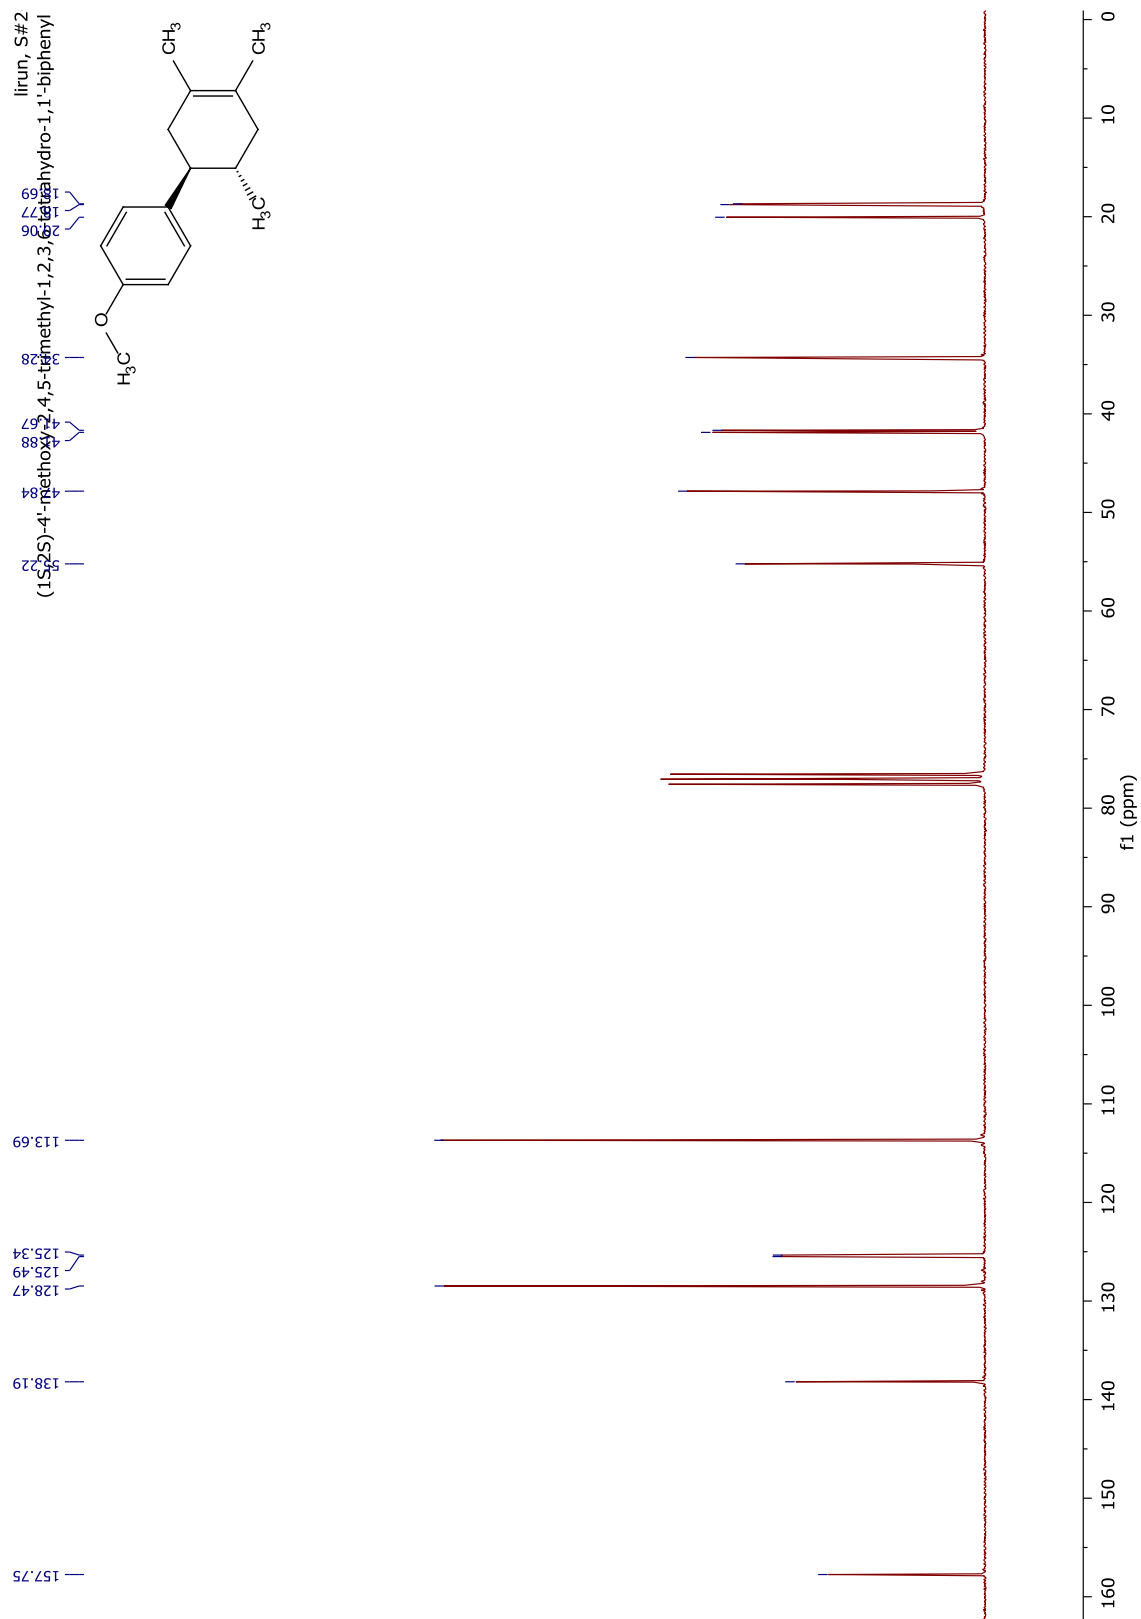

lirun, S#3  
 (1R,2S)-4'-methoxy-2,4,6-trimethyl-1,2,3,6-tetrahydronaph-1,1'-biphenyl

6.97  
 6.76  
 5.12  
 3.72  
 1.11  
 1.05  
 0.98  
 1.02  
 0.70  
 0.59

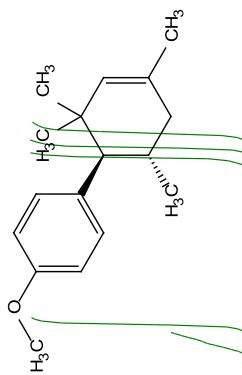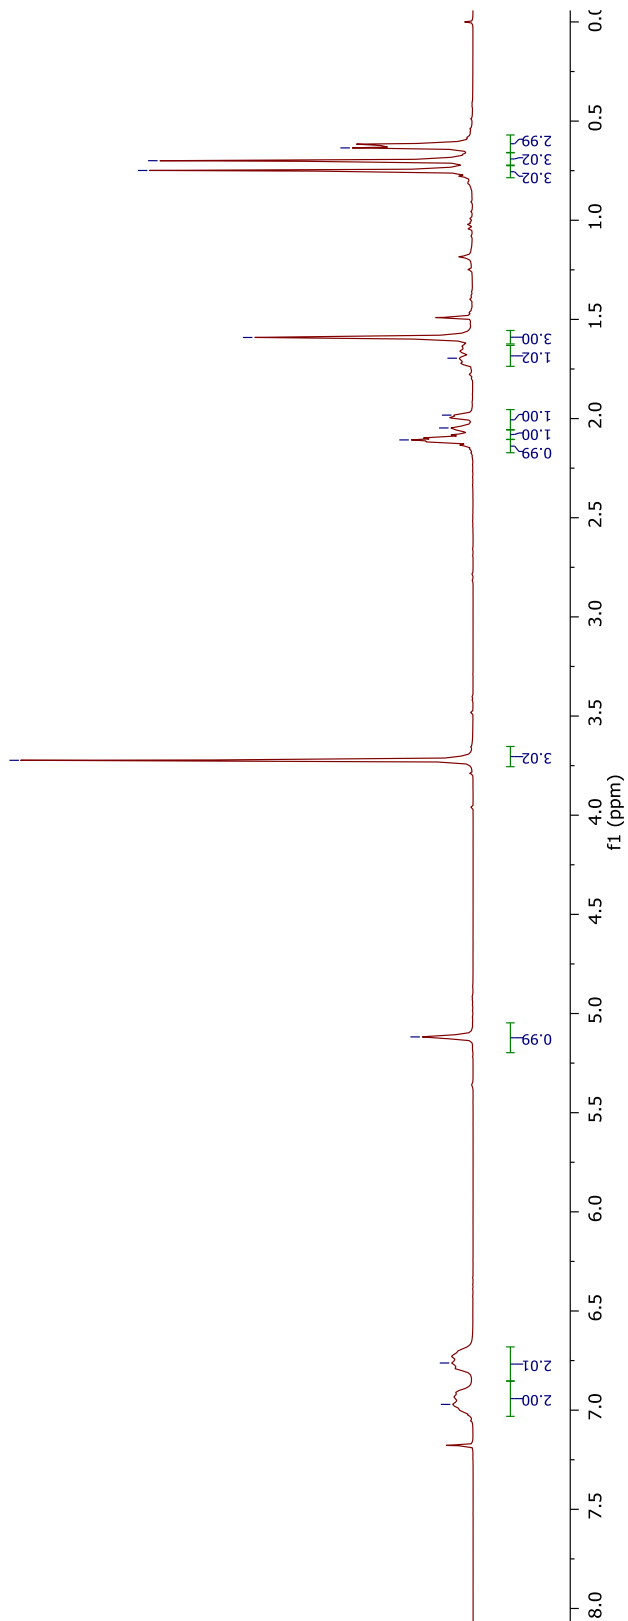

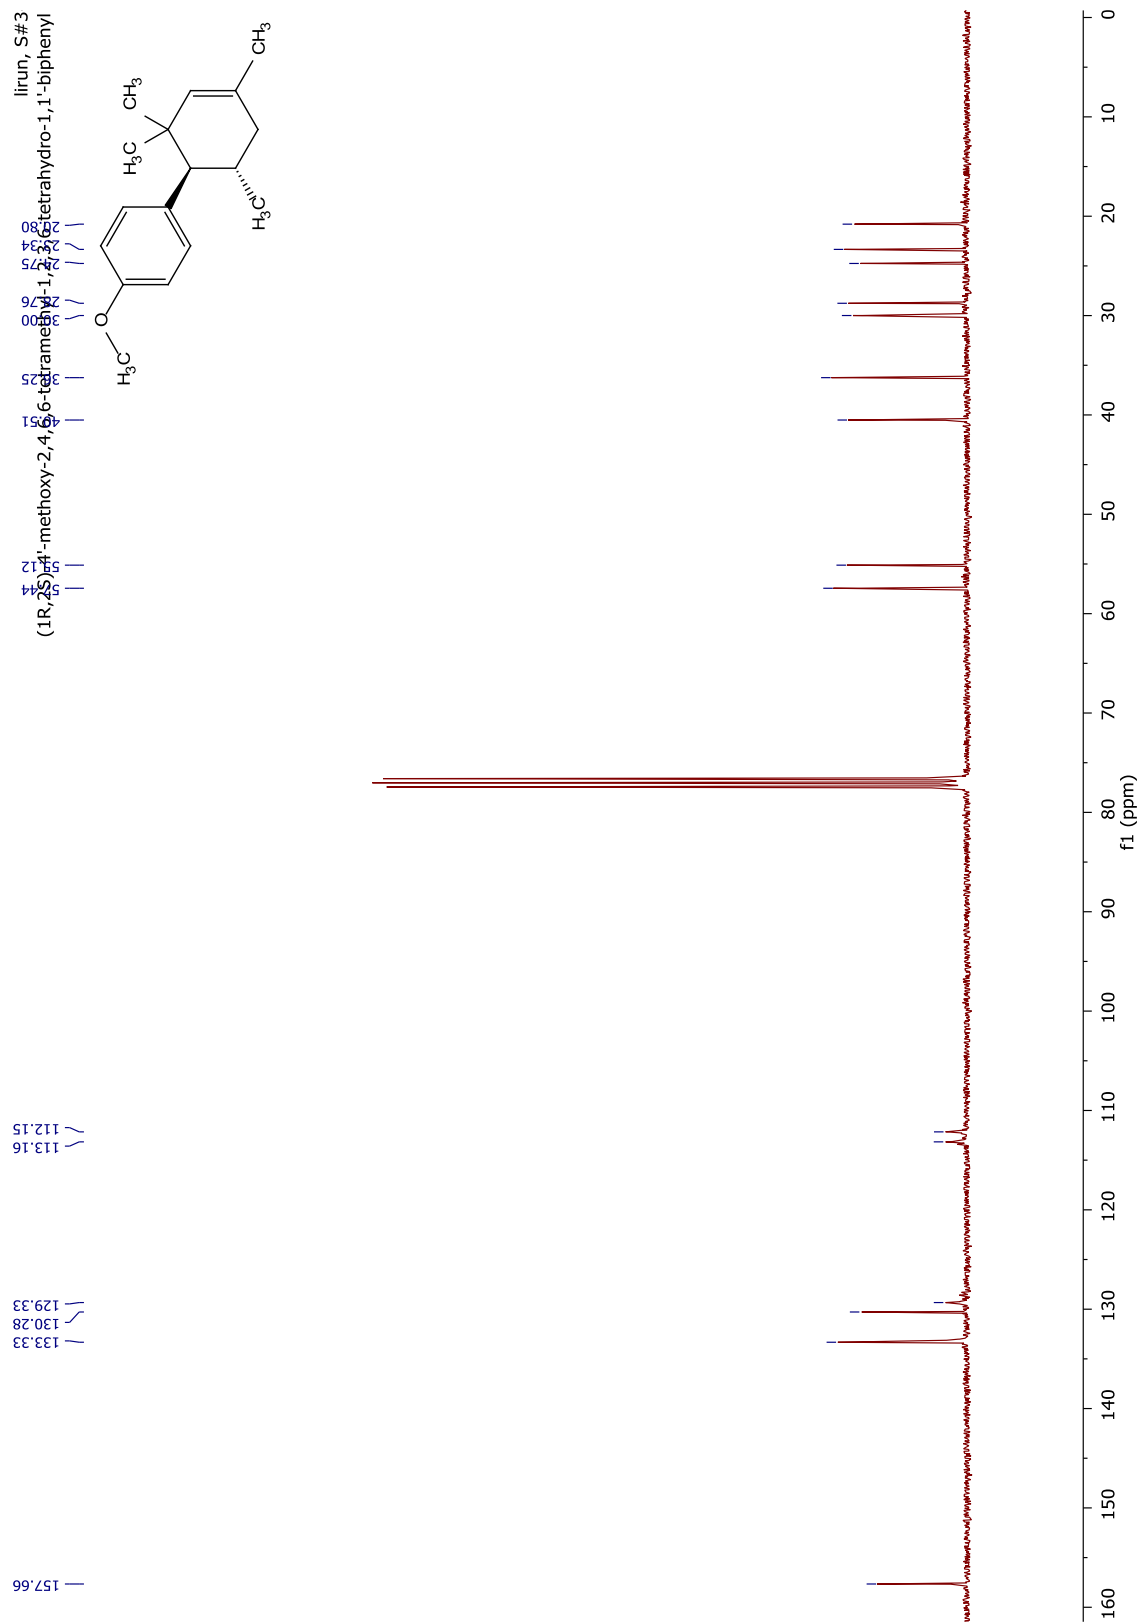

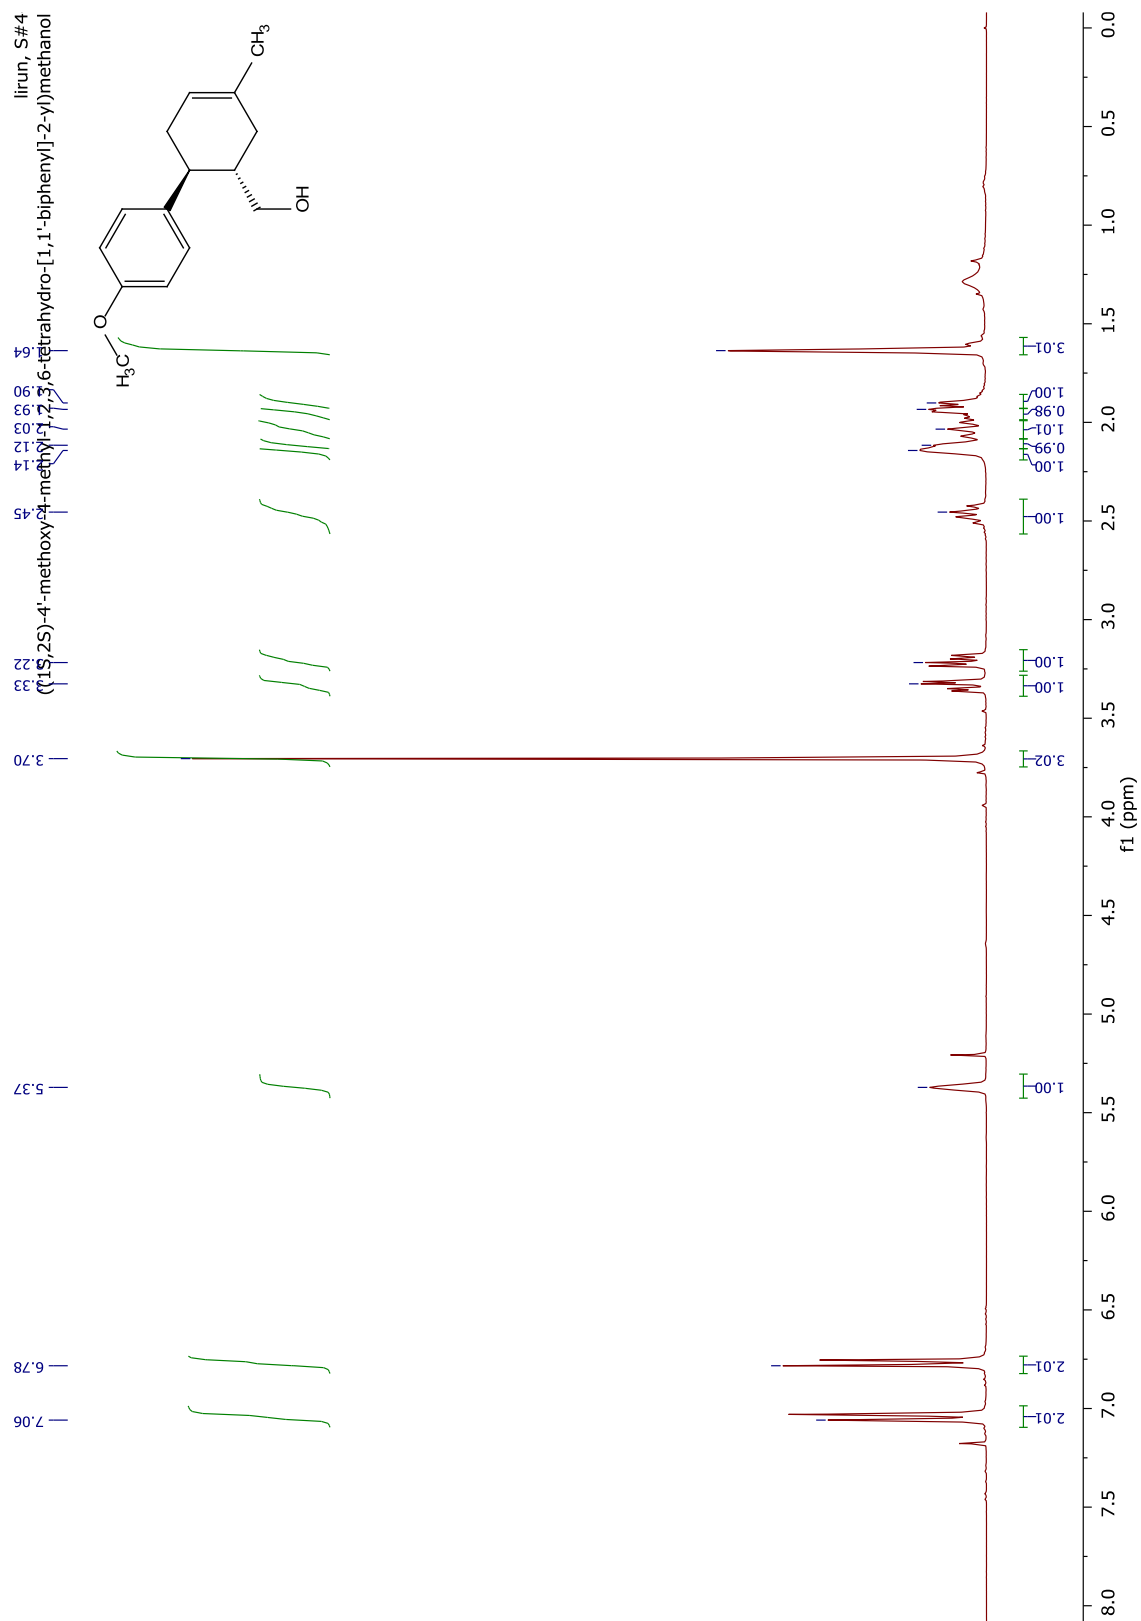



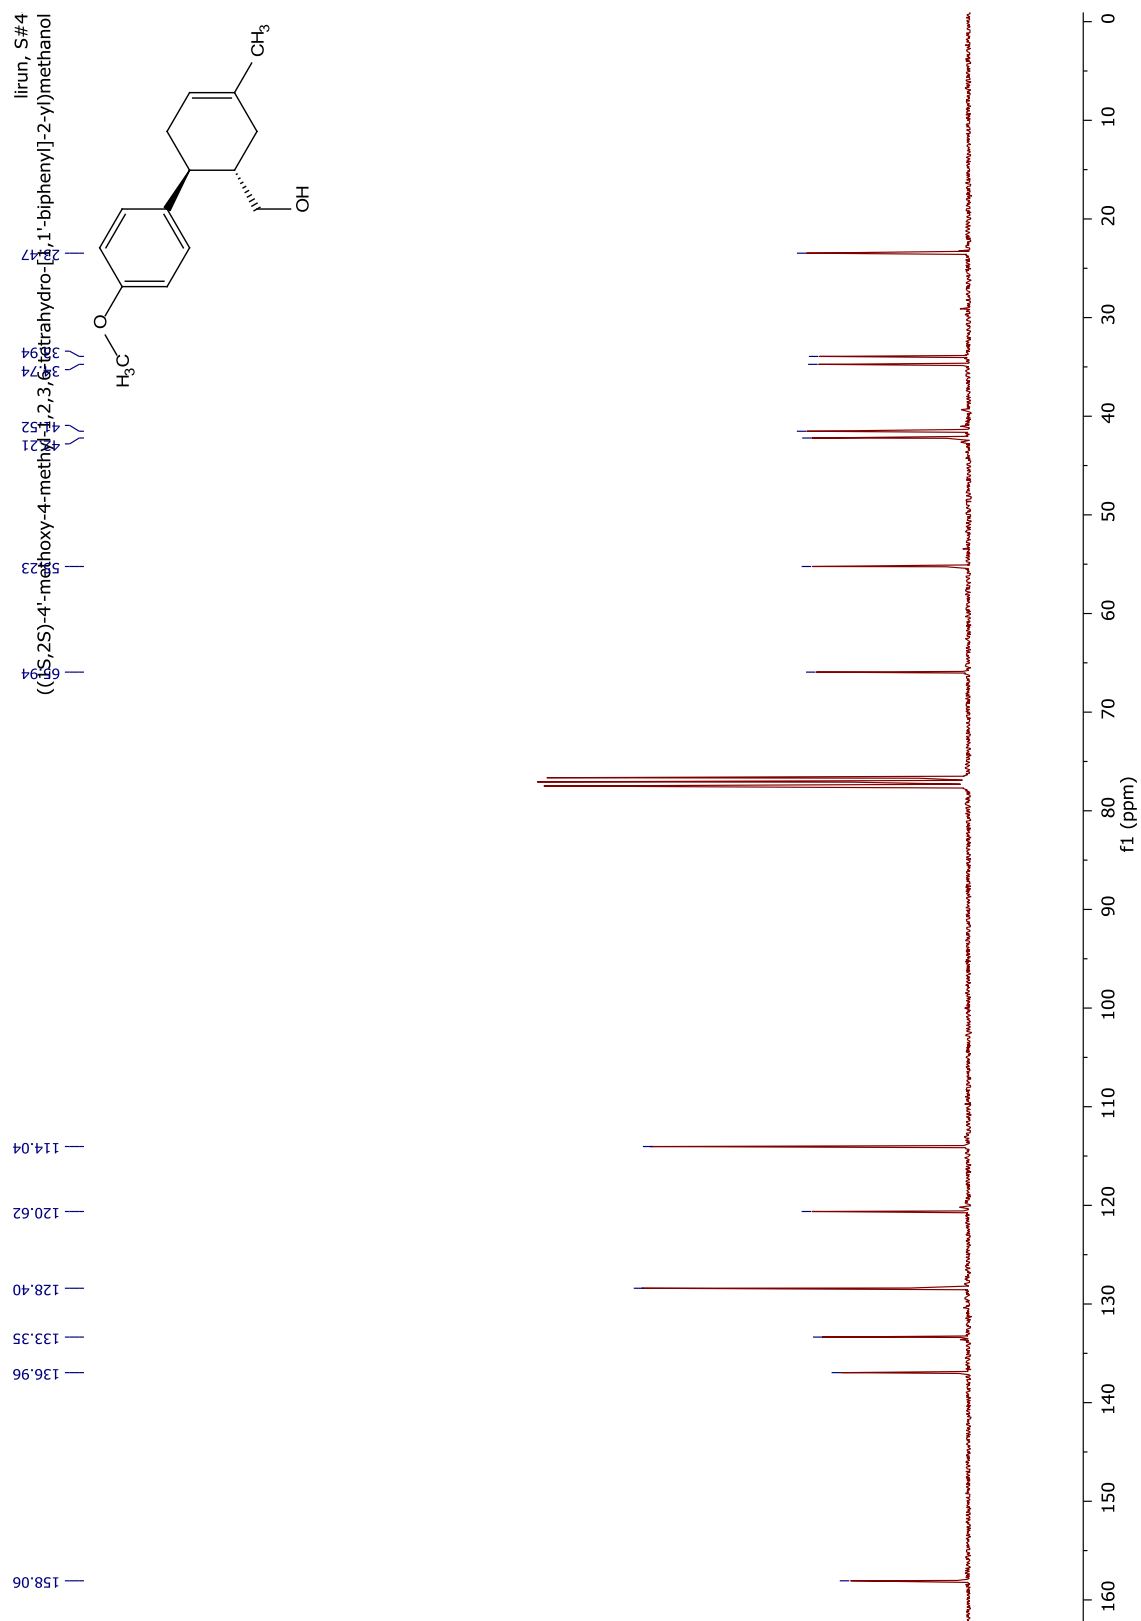

lirun, S#6  
(1S,2S)-4'-ethoxy-3'-methoxy-7,4',5'-trimethyl-1,2,3,6-tetrahydro-1,1'-biphenyl

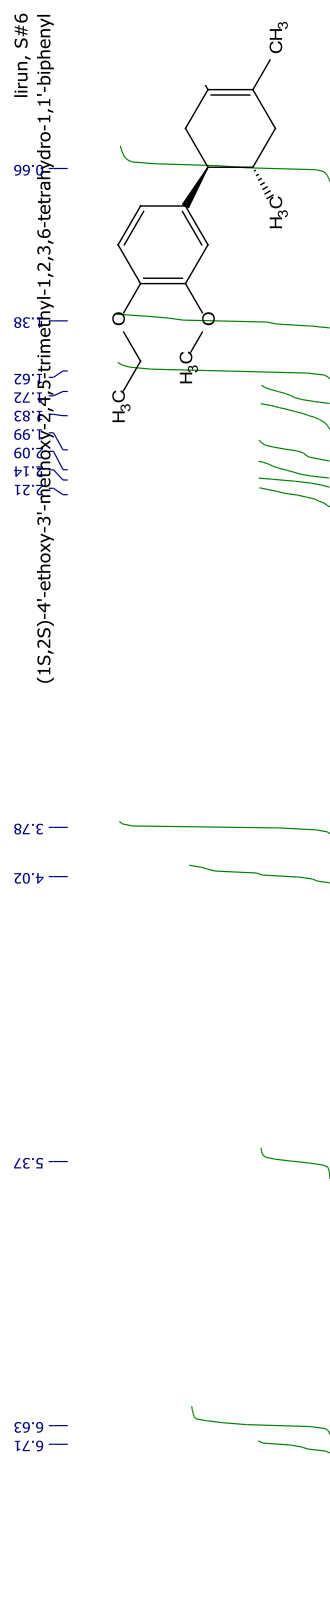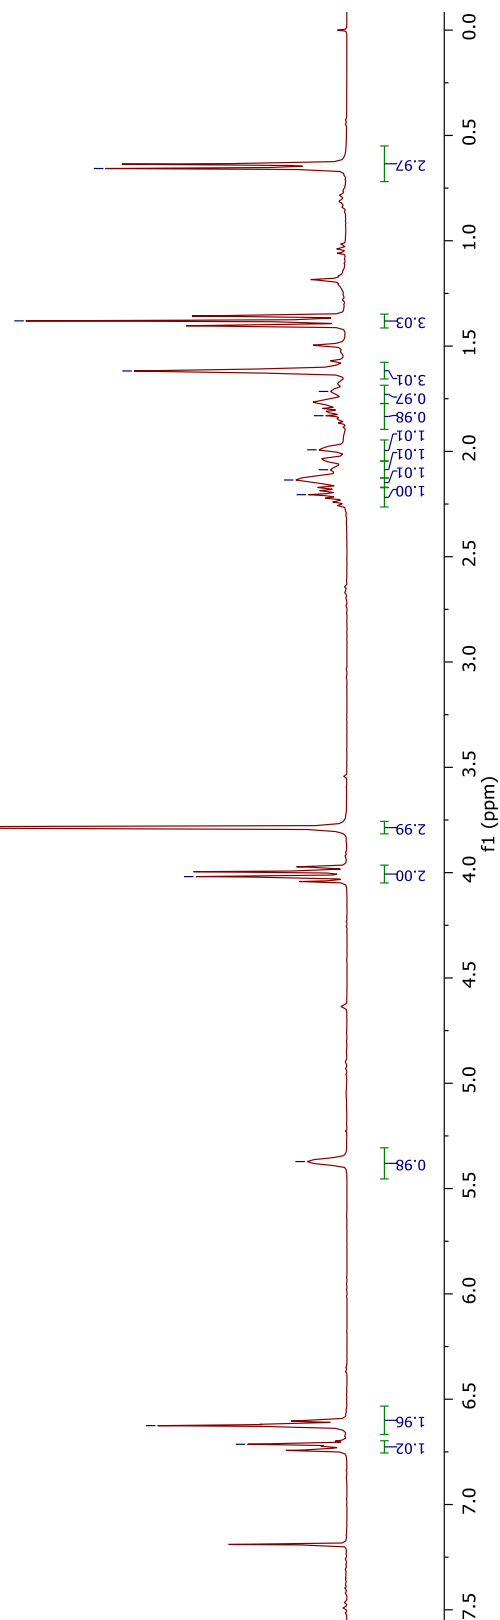

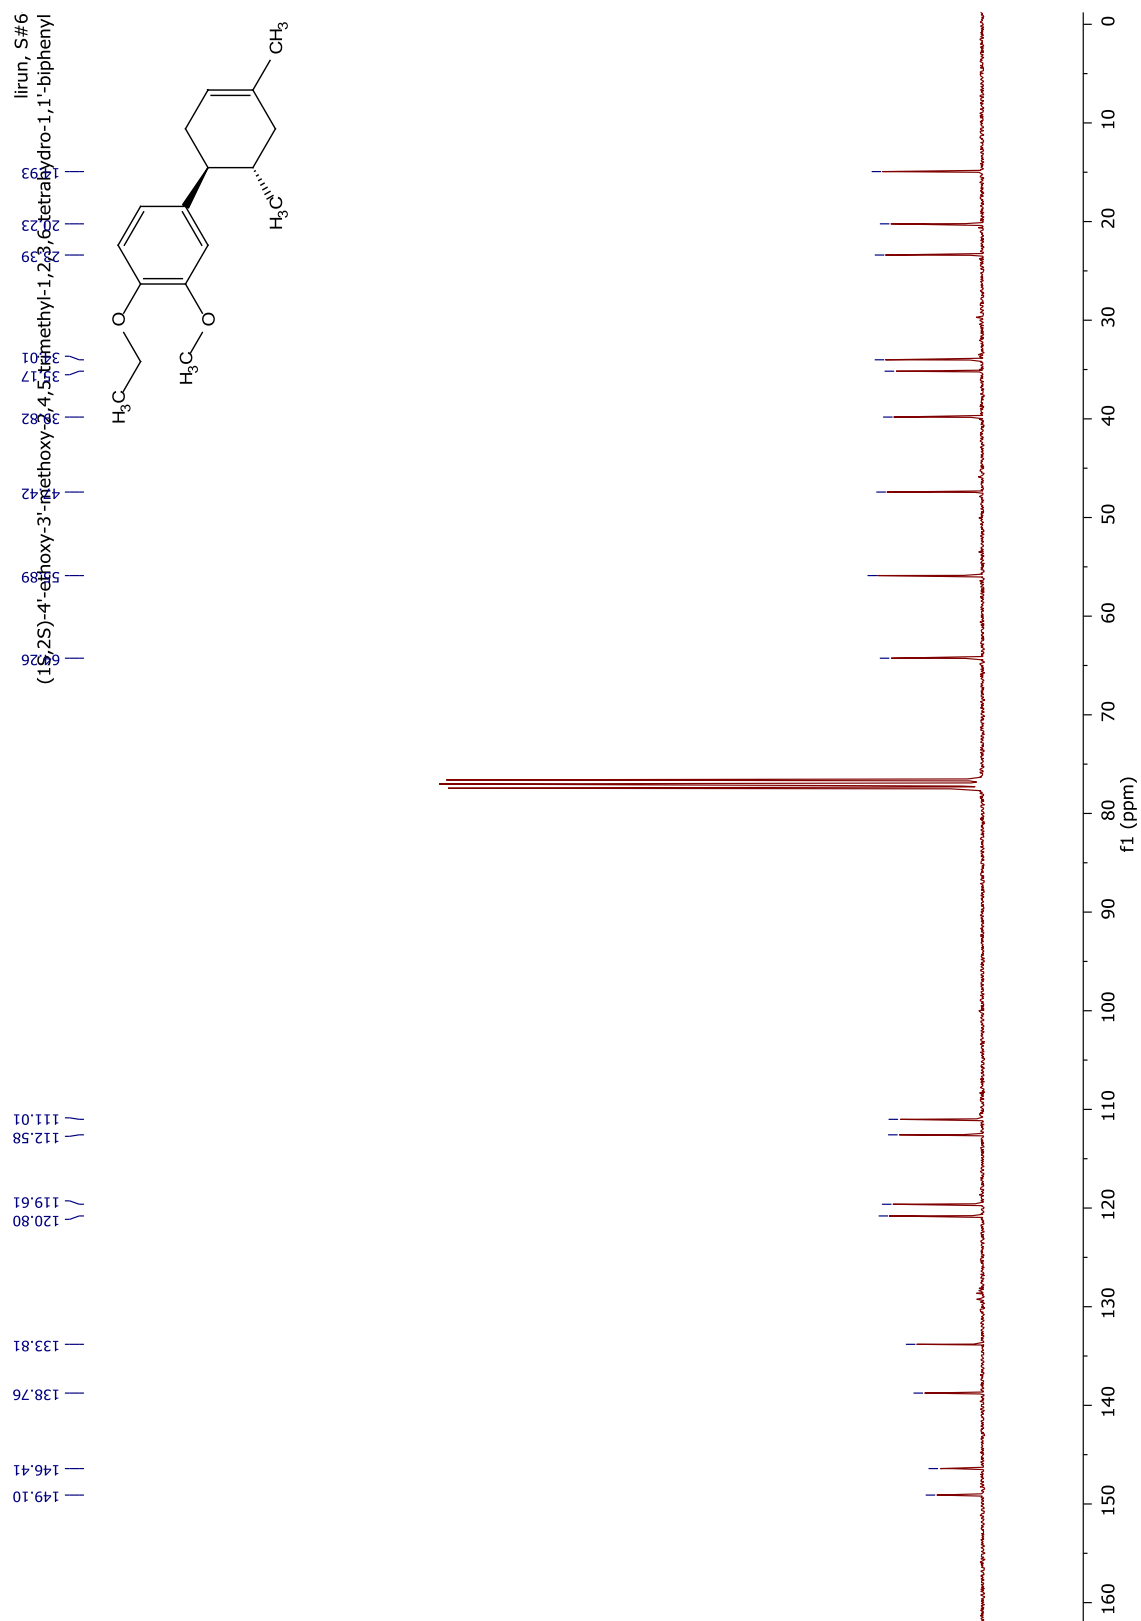

lirun, S#7  
 1-((1S,6S)-6-(benzo[d][1,3]dioxol-5-yl)-3-methylcyclohex-3-en-1-yl)ethan-1-one

7.31  
 7.23  
 7.07  
 7.00  
 6.96  
 6.72  
 6.70  
 6.67

5.99  
 5.87

5.48

5.93

6.72  
 6.70  
 6.67

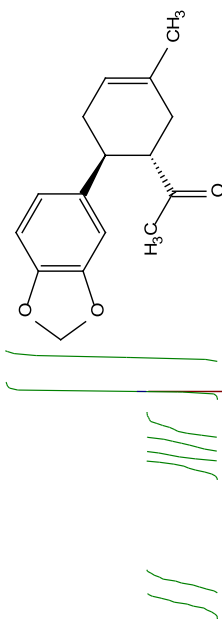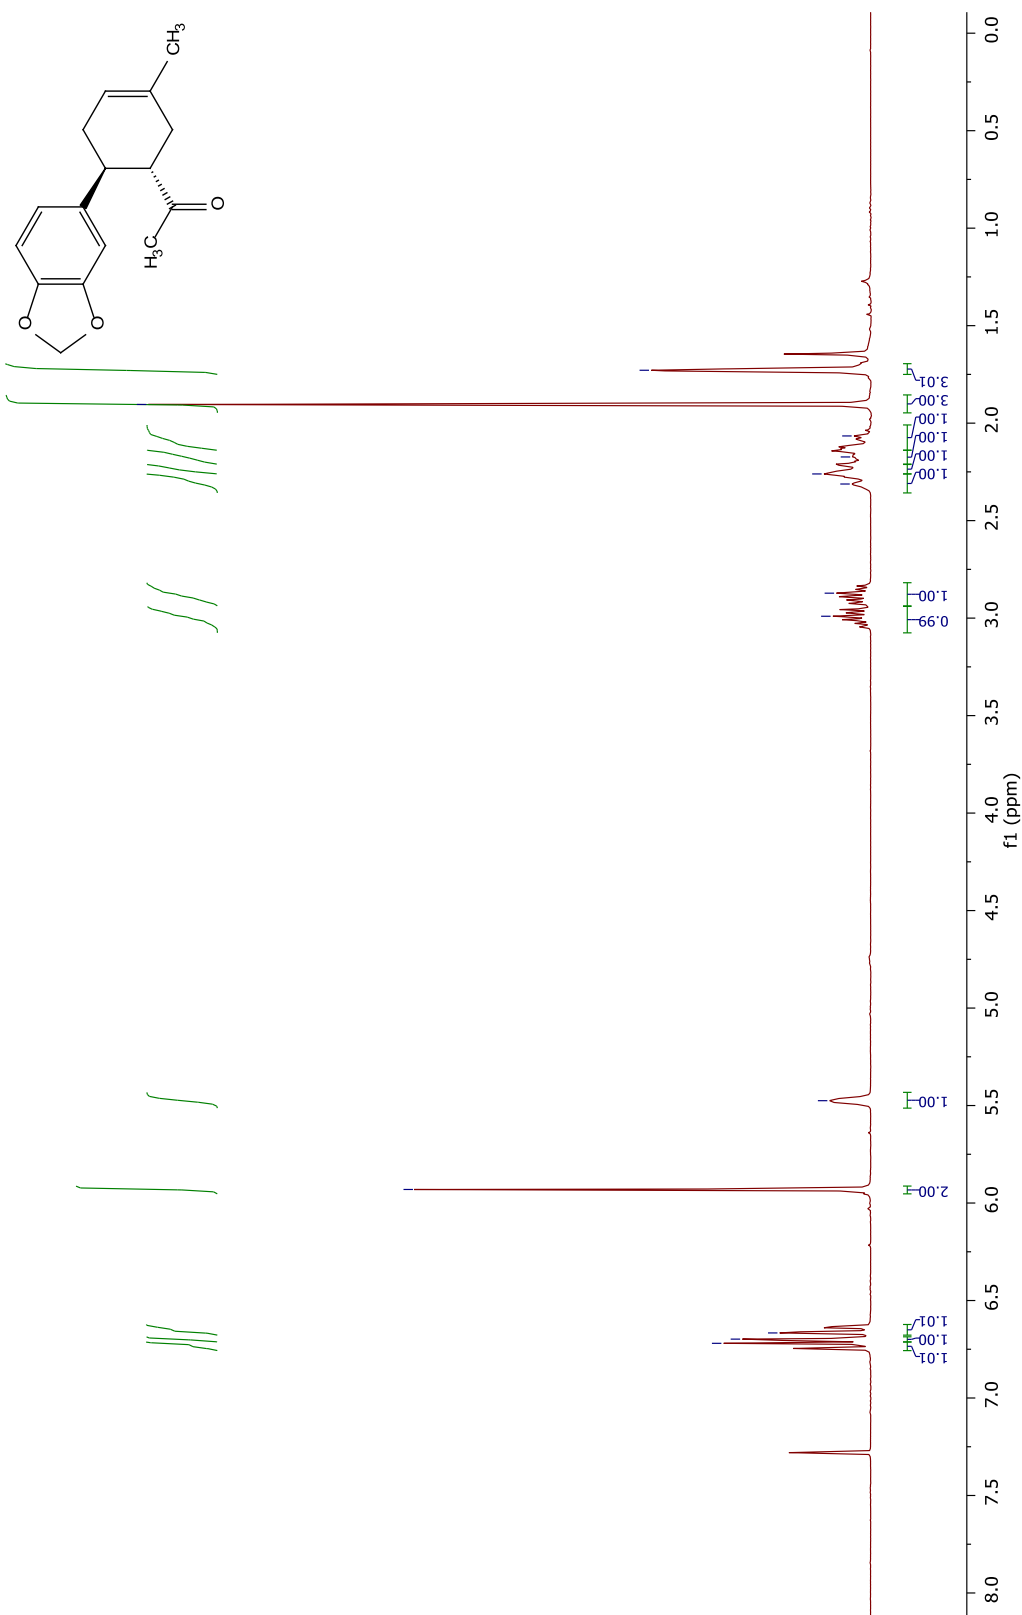

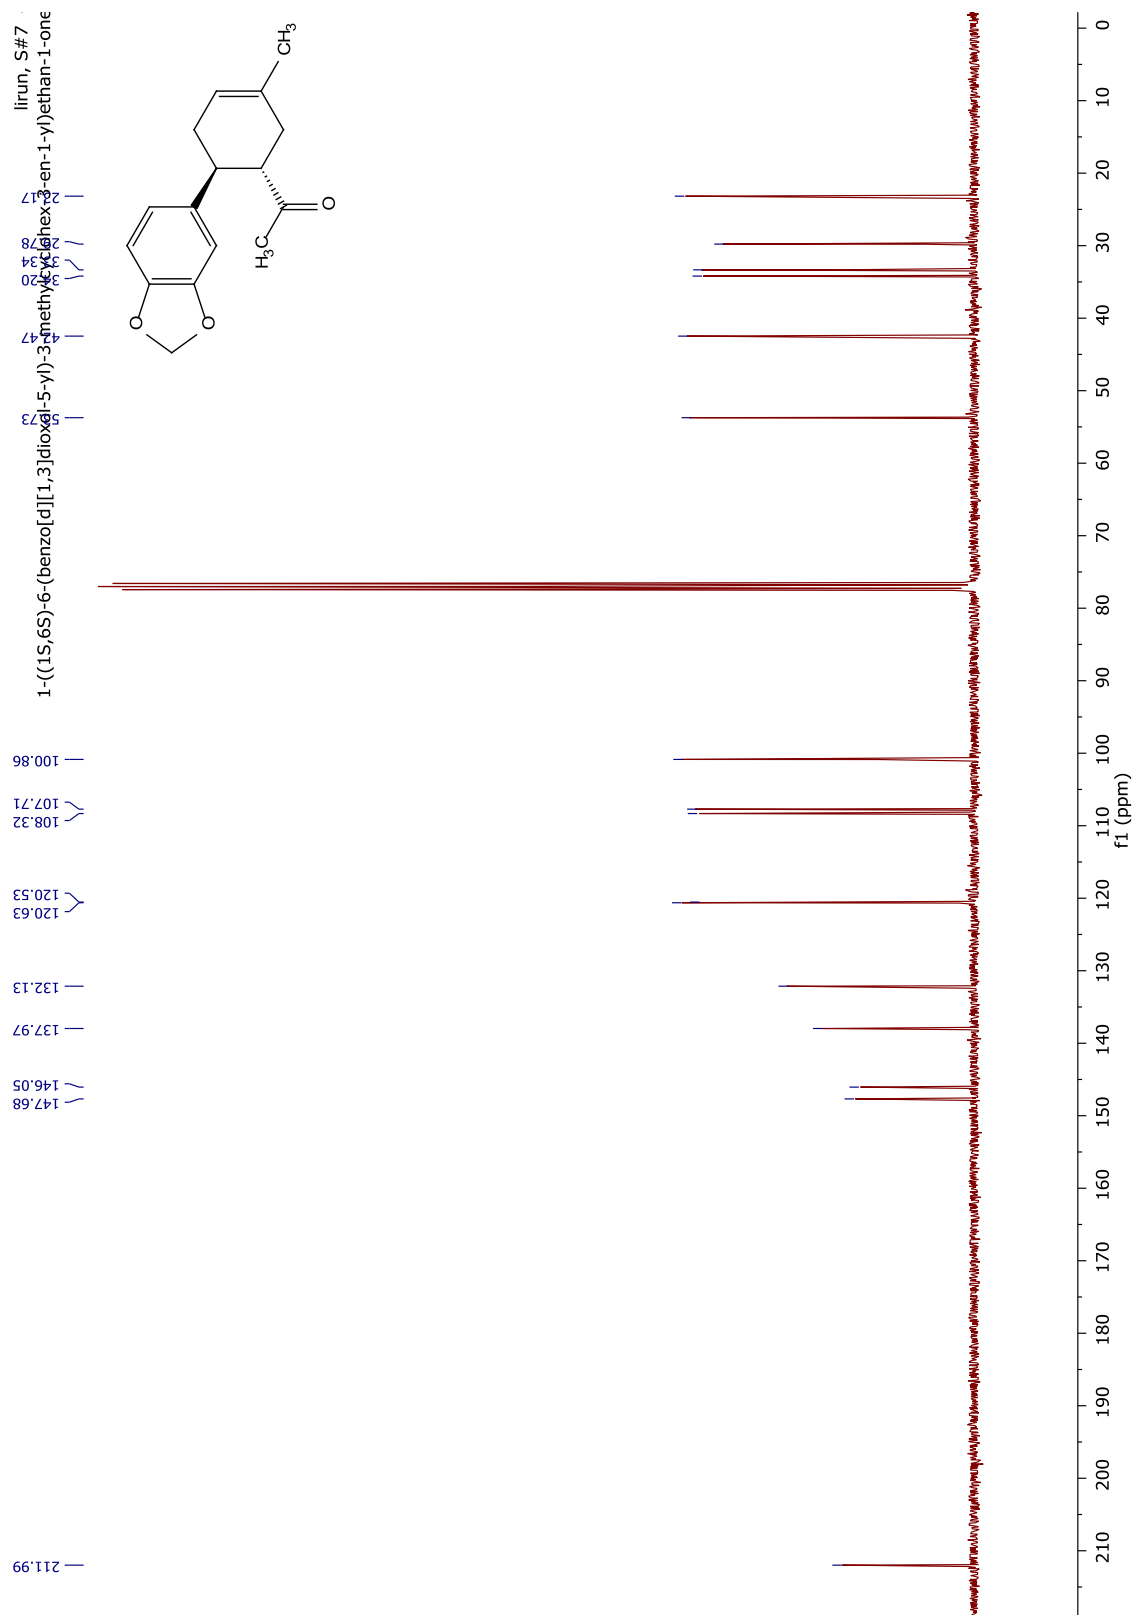

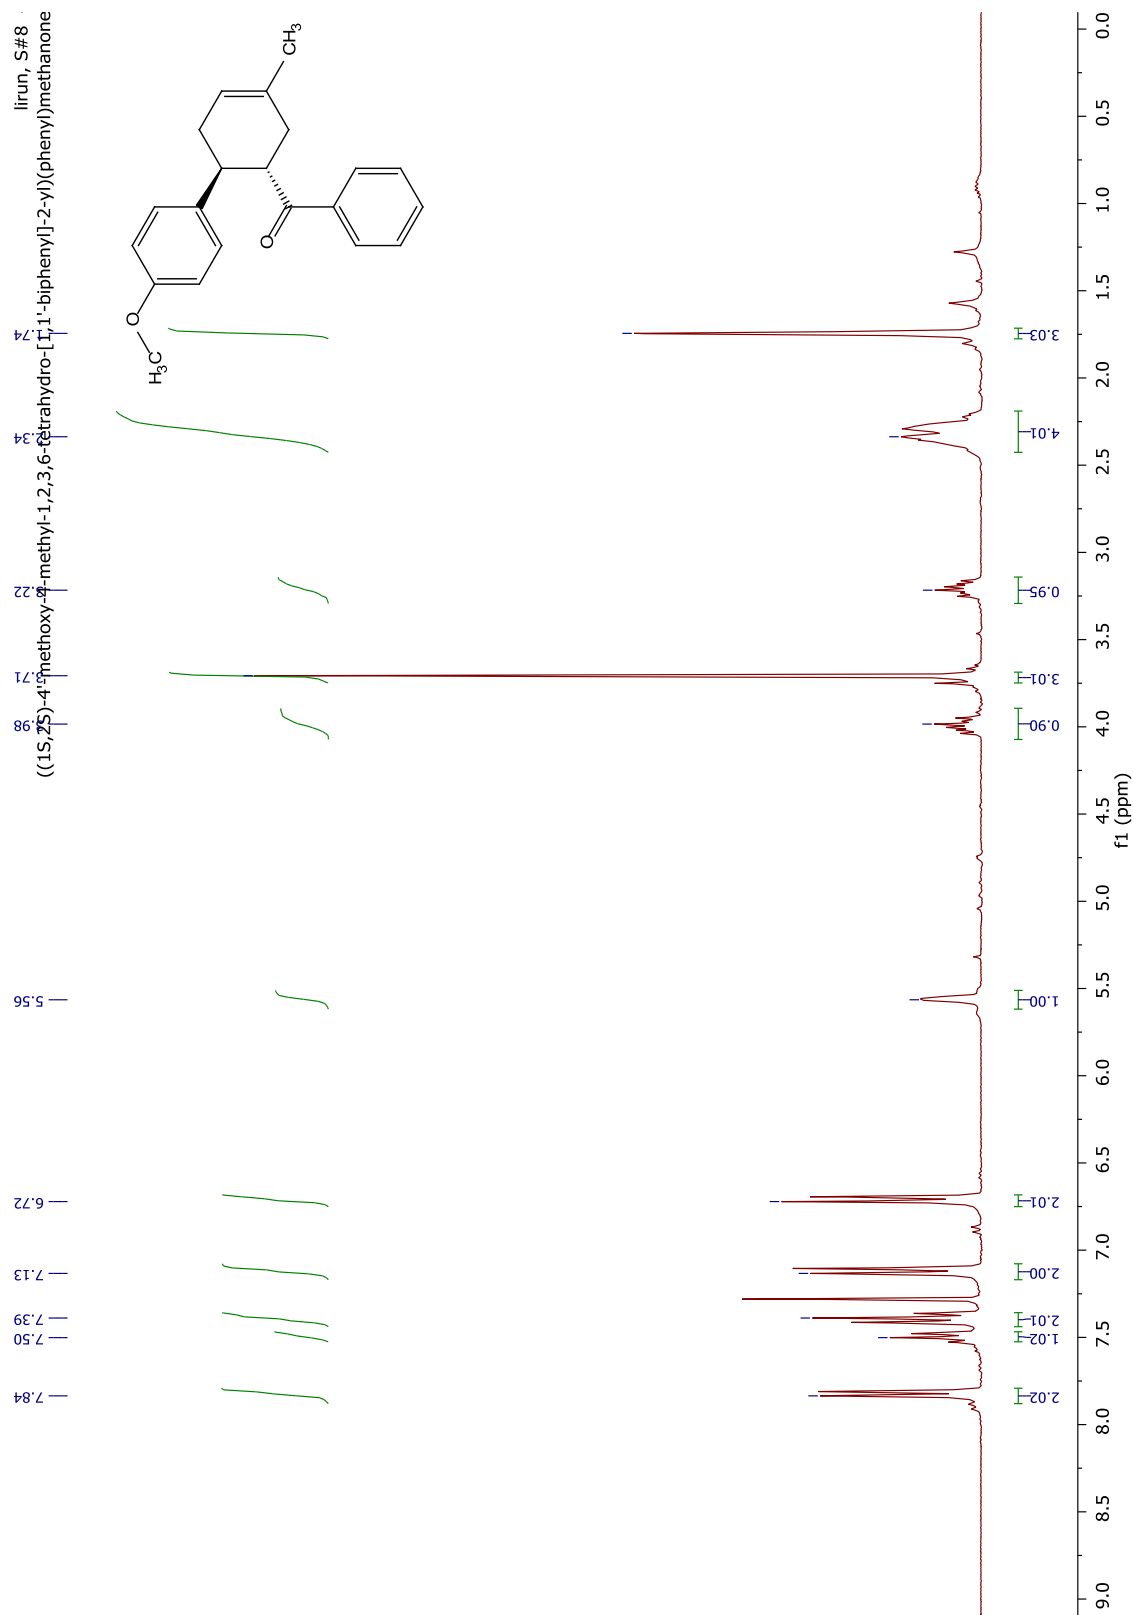

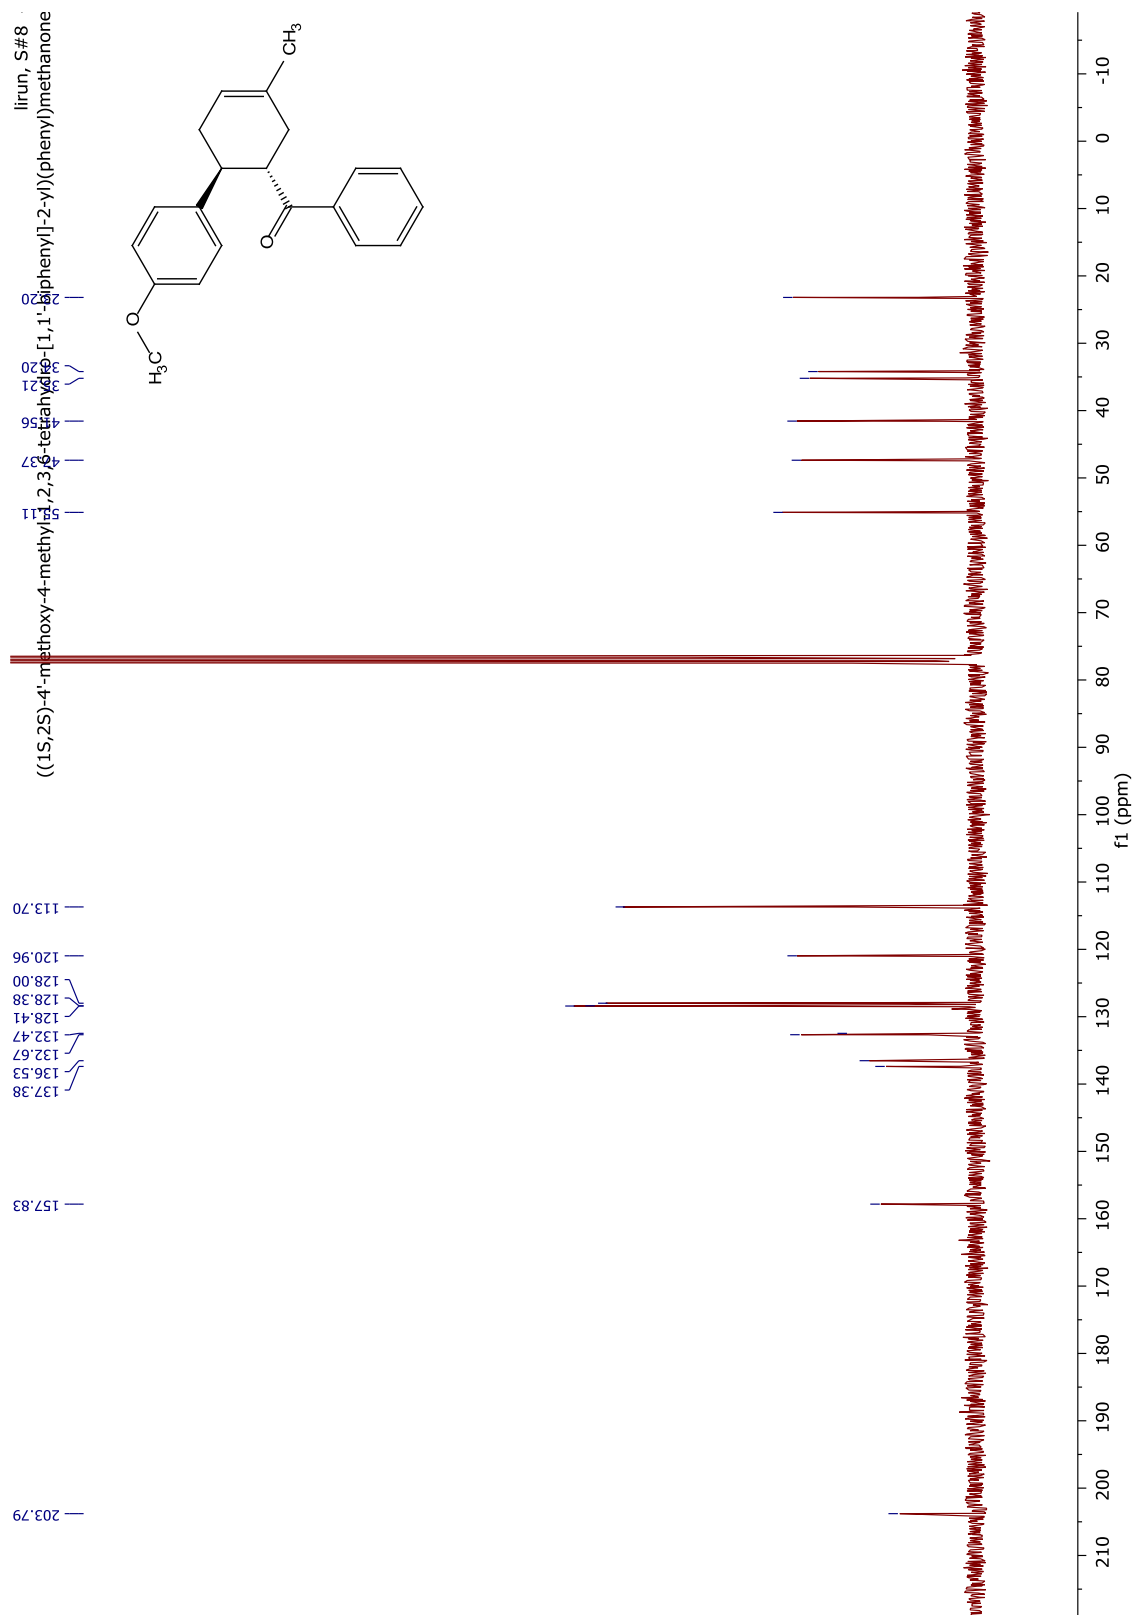

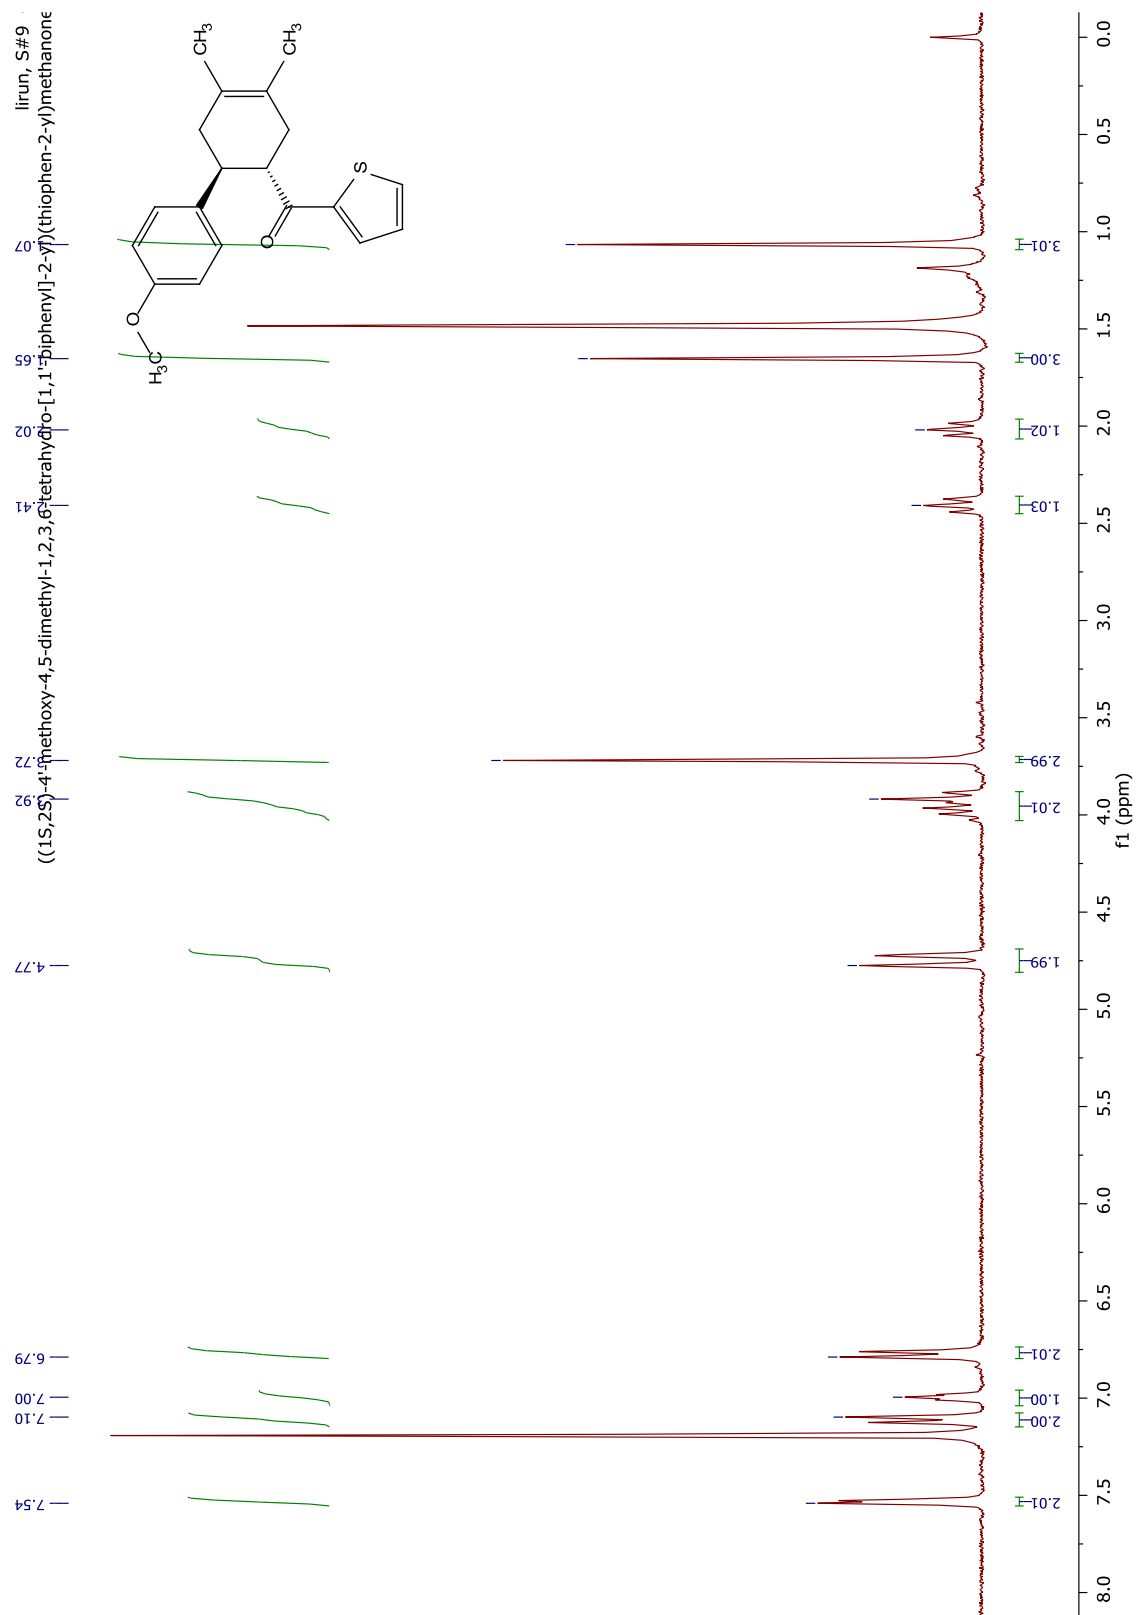



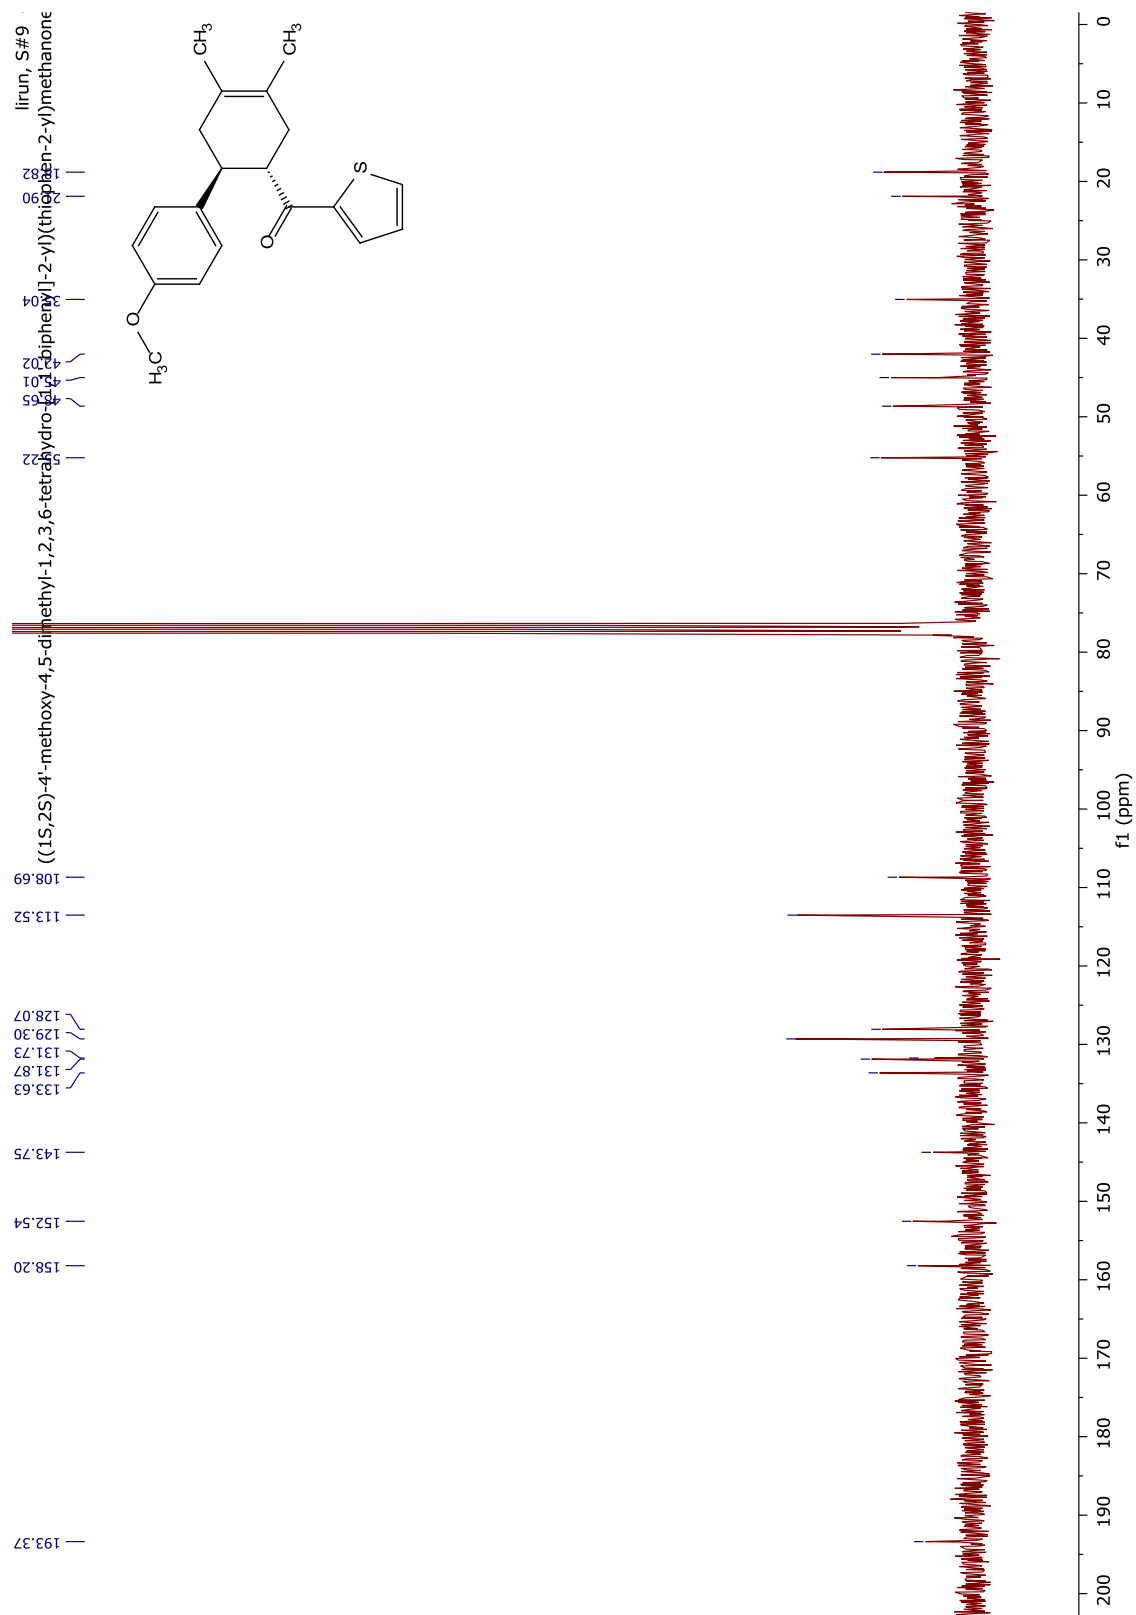

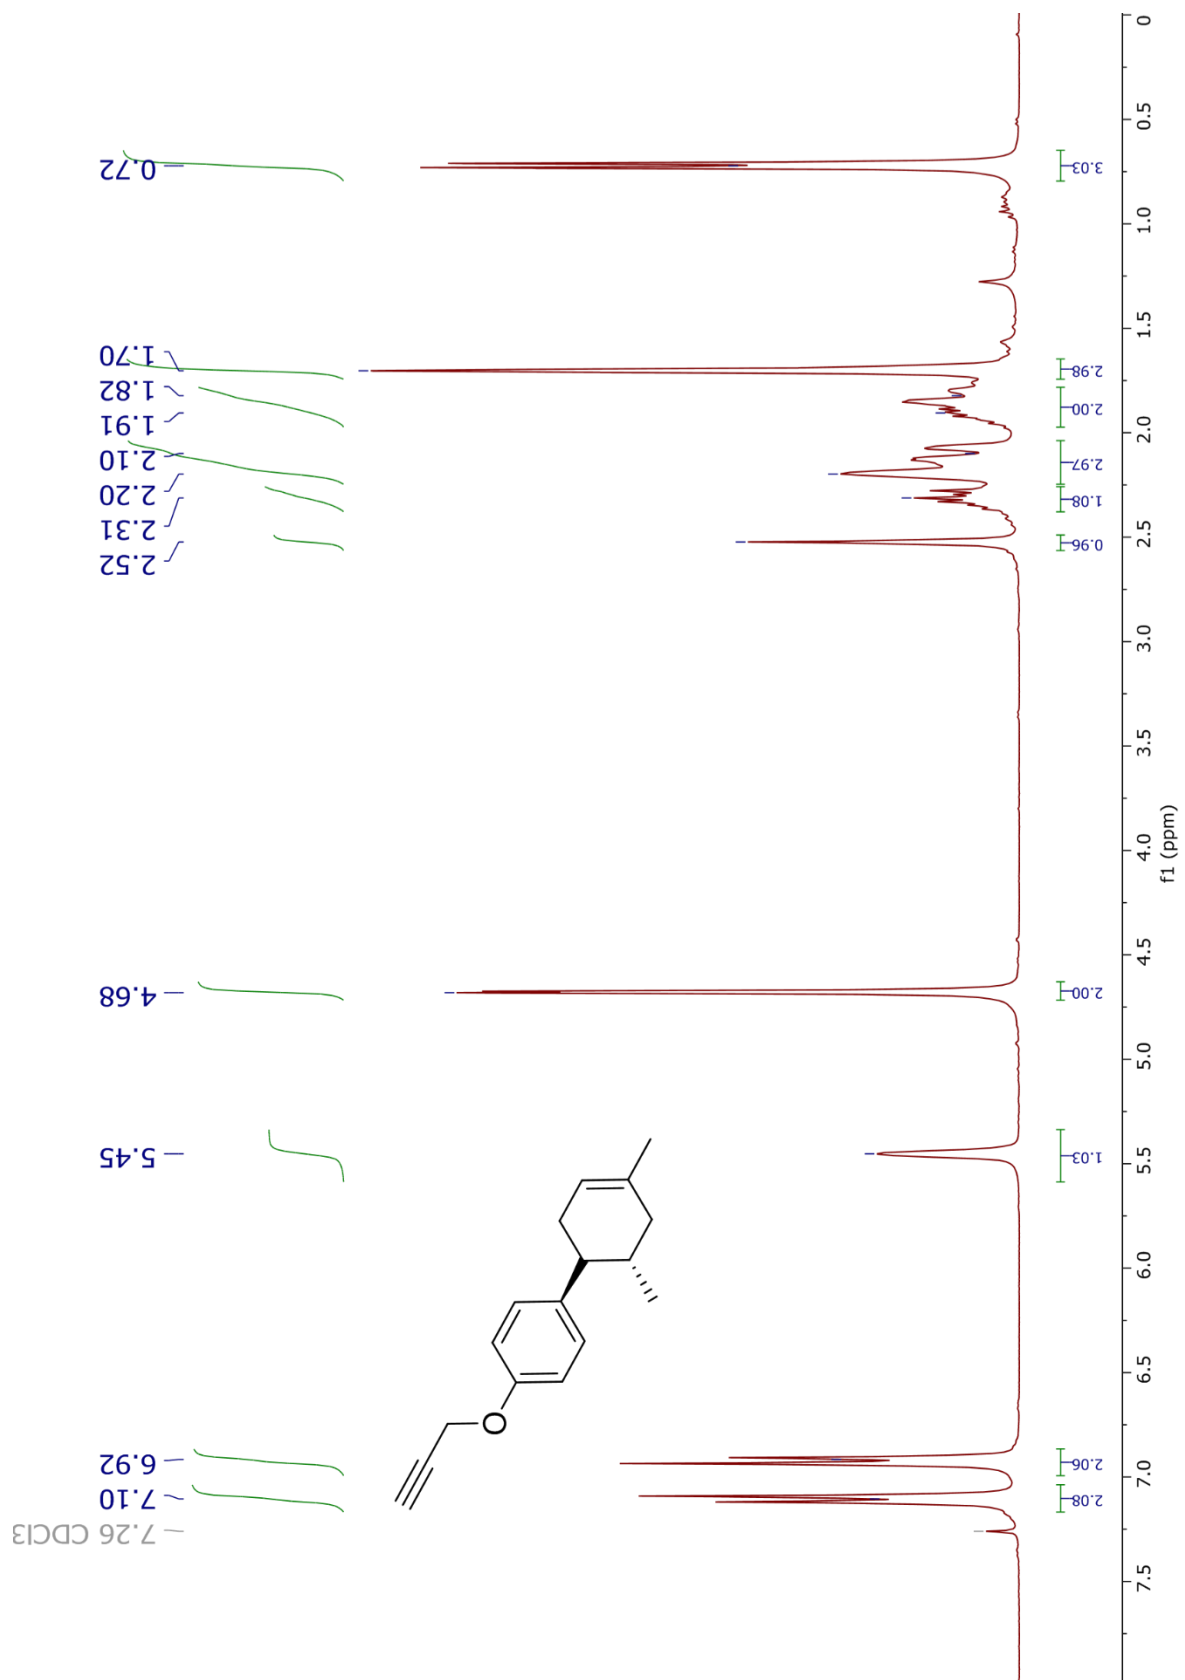

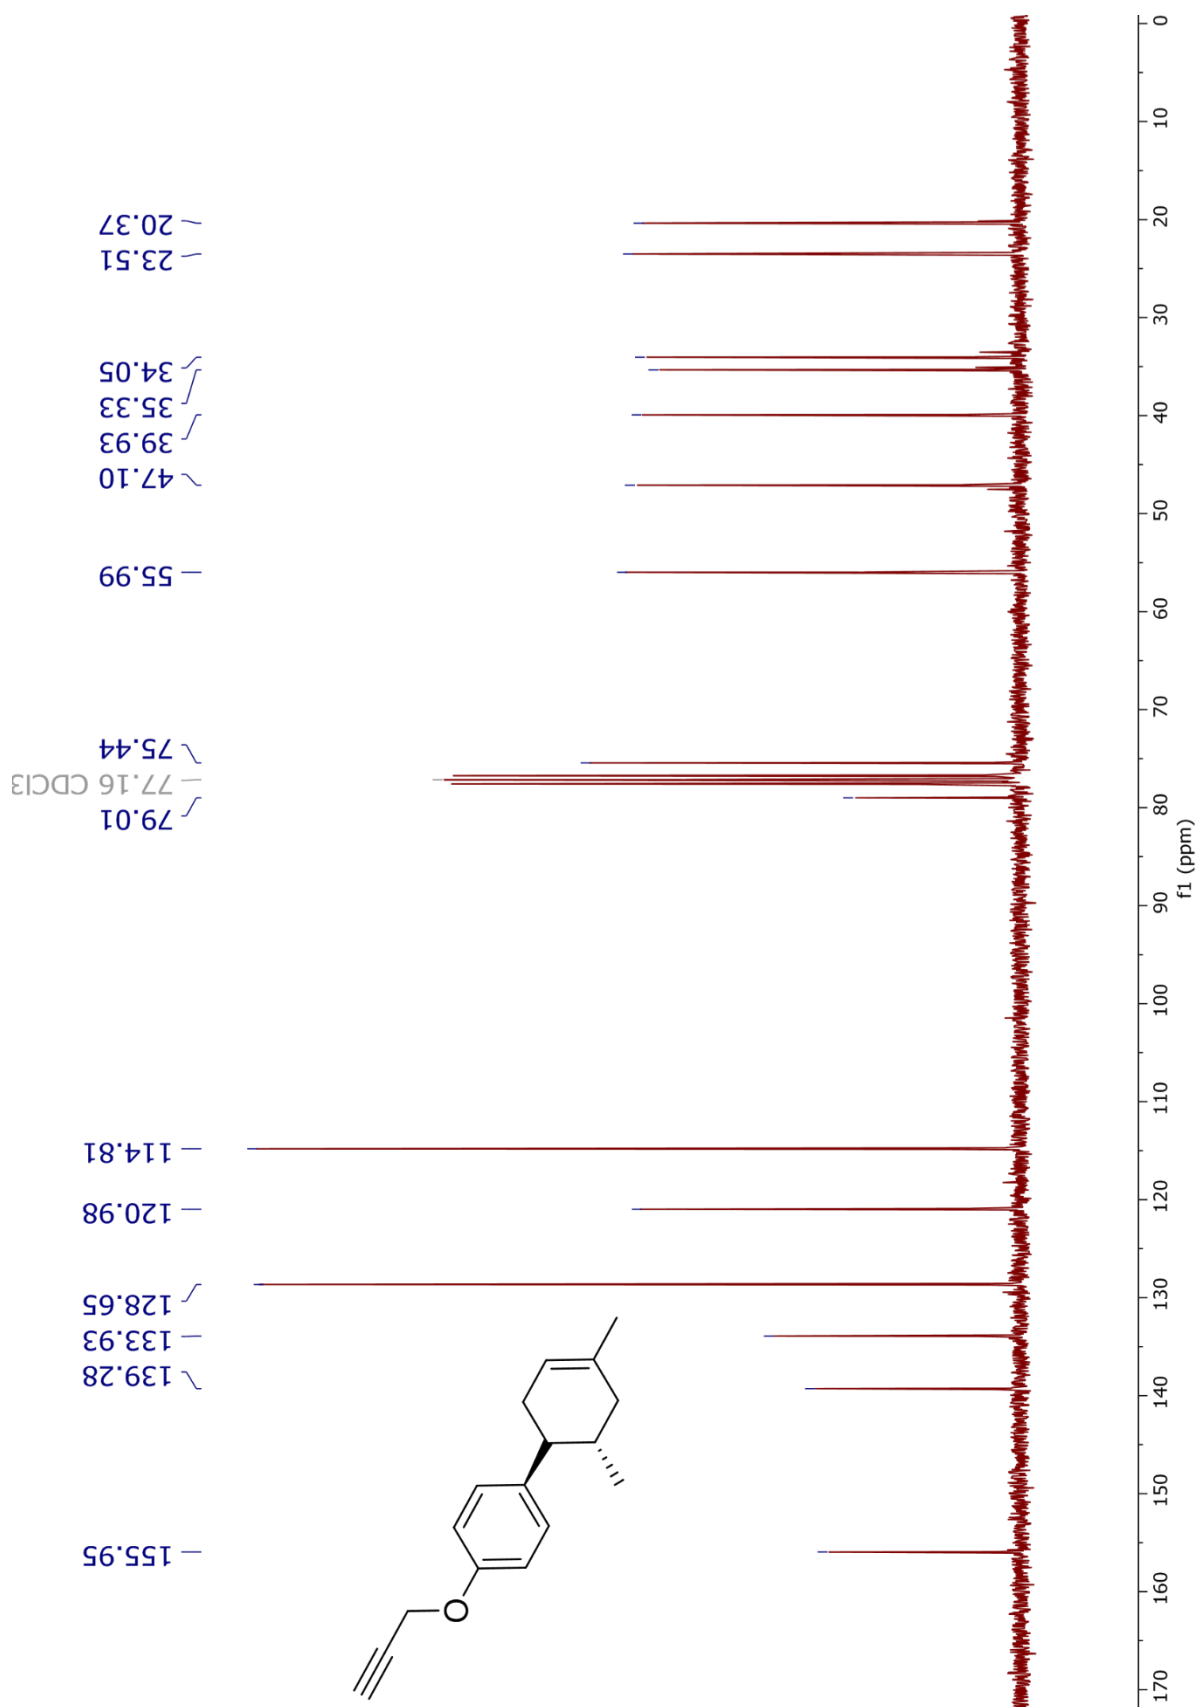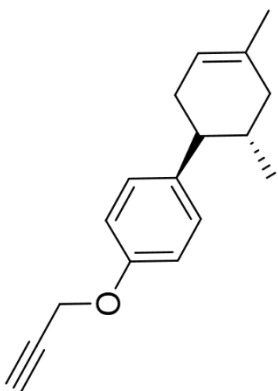

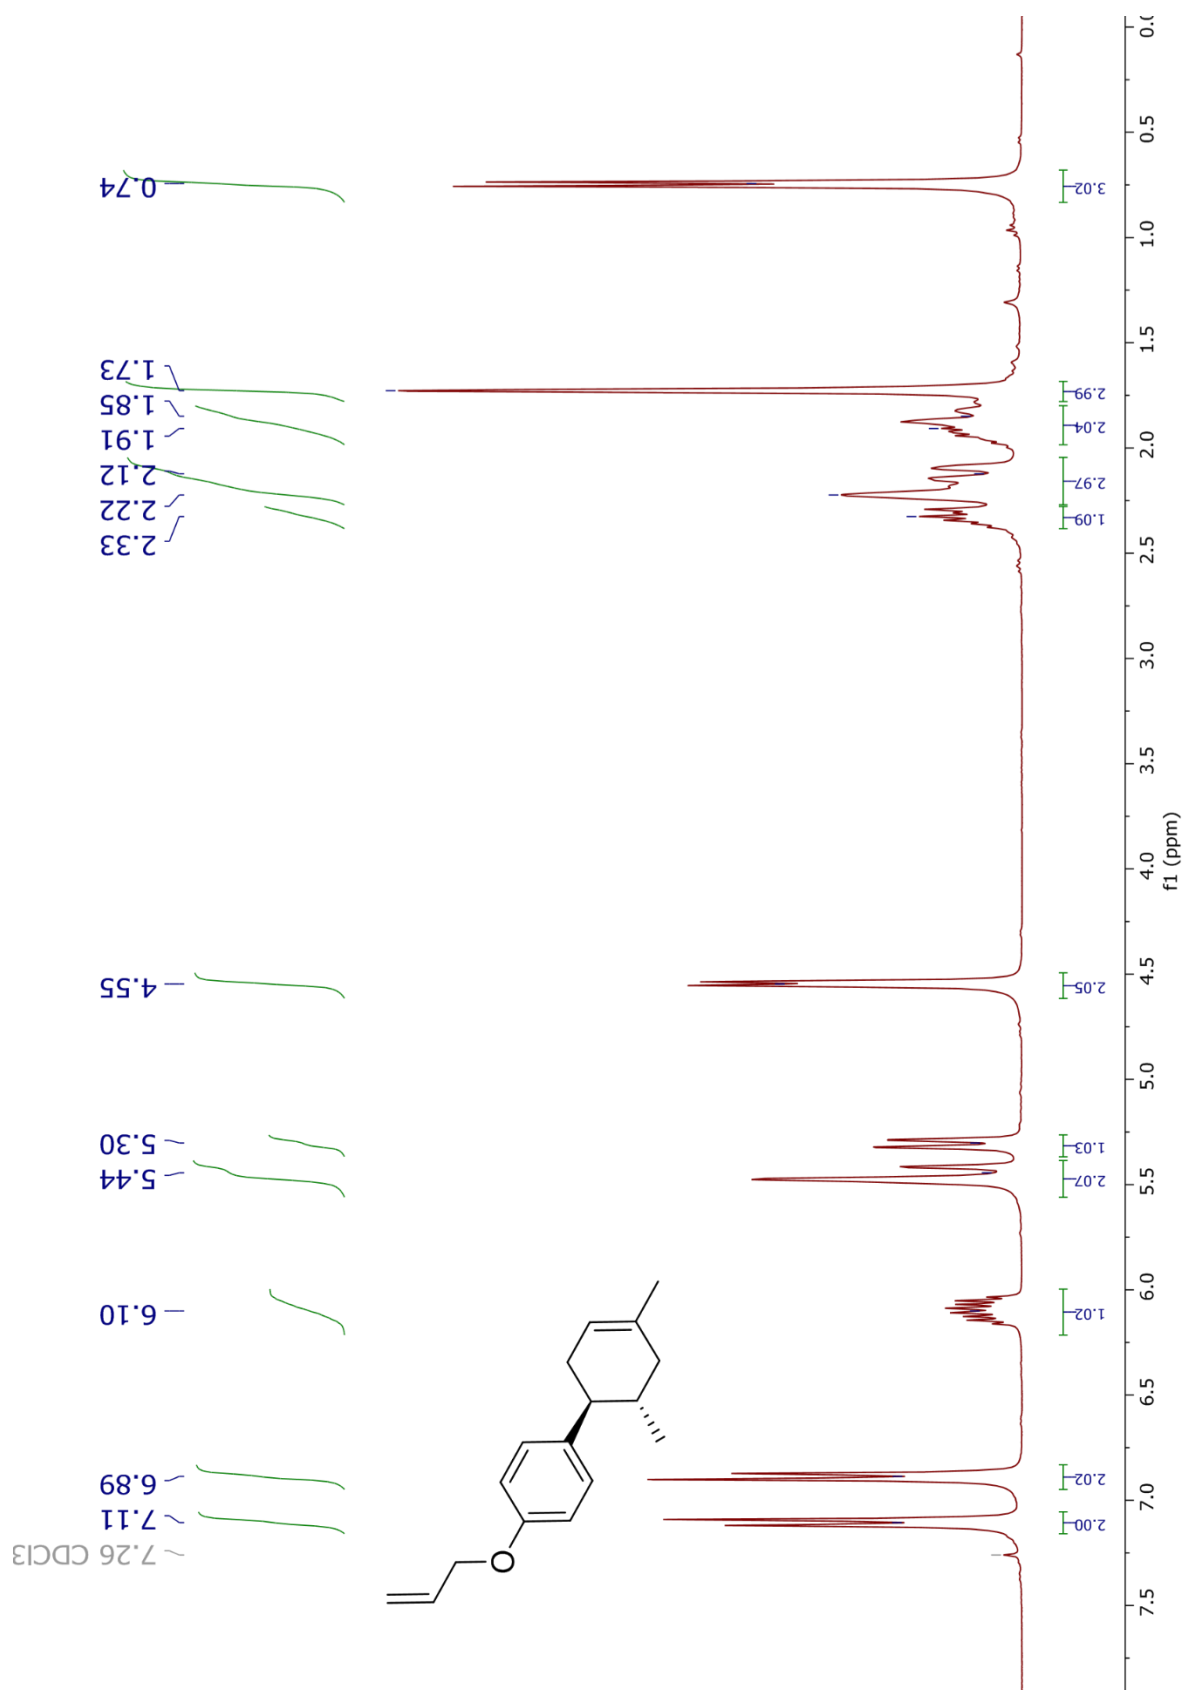

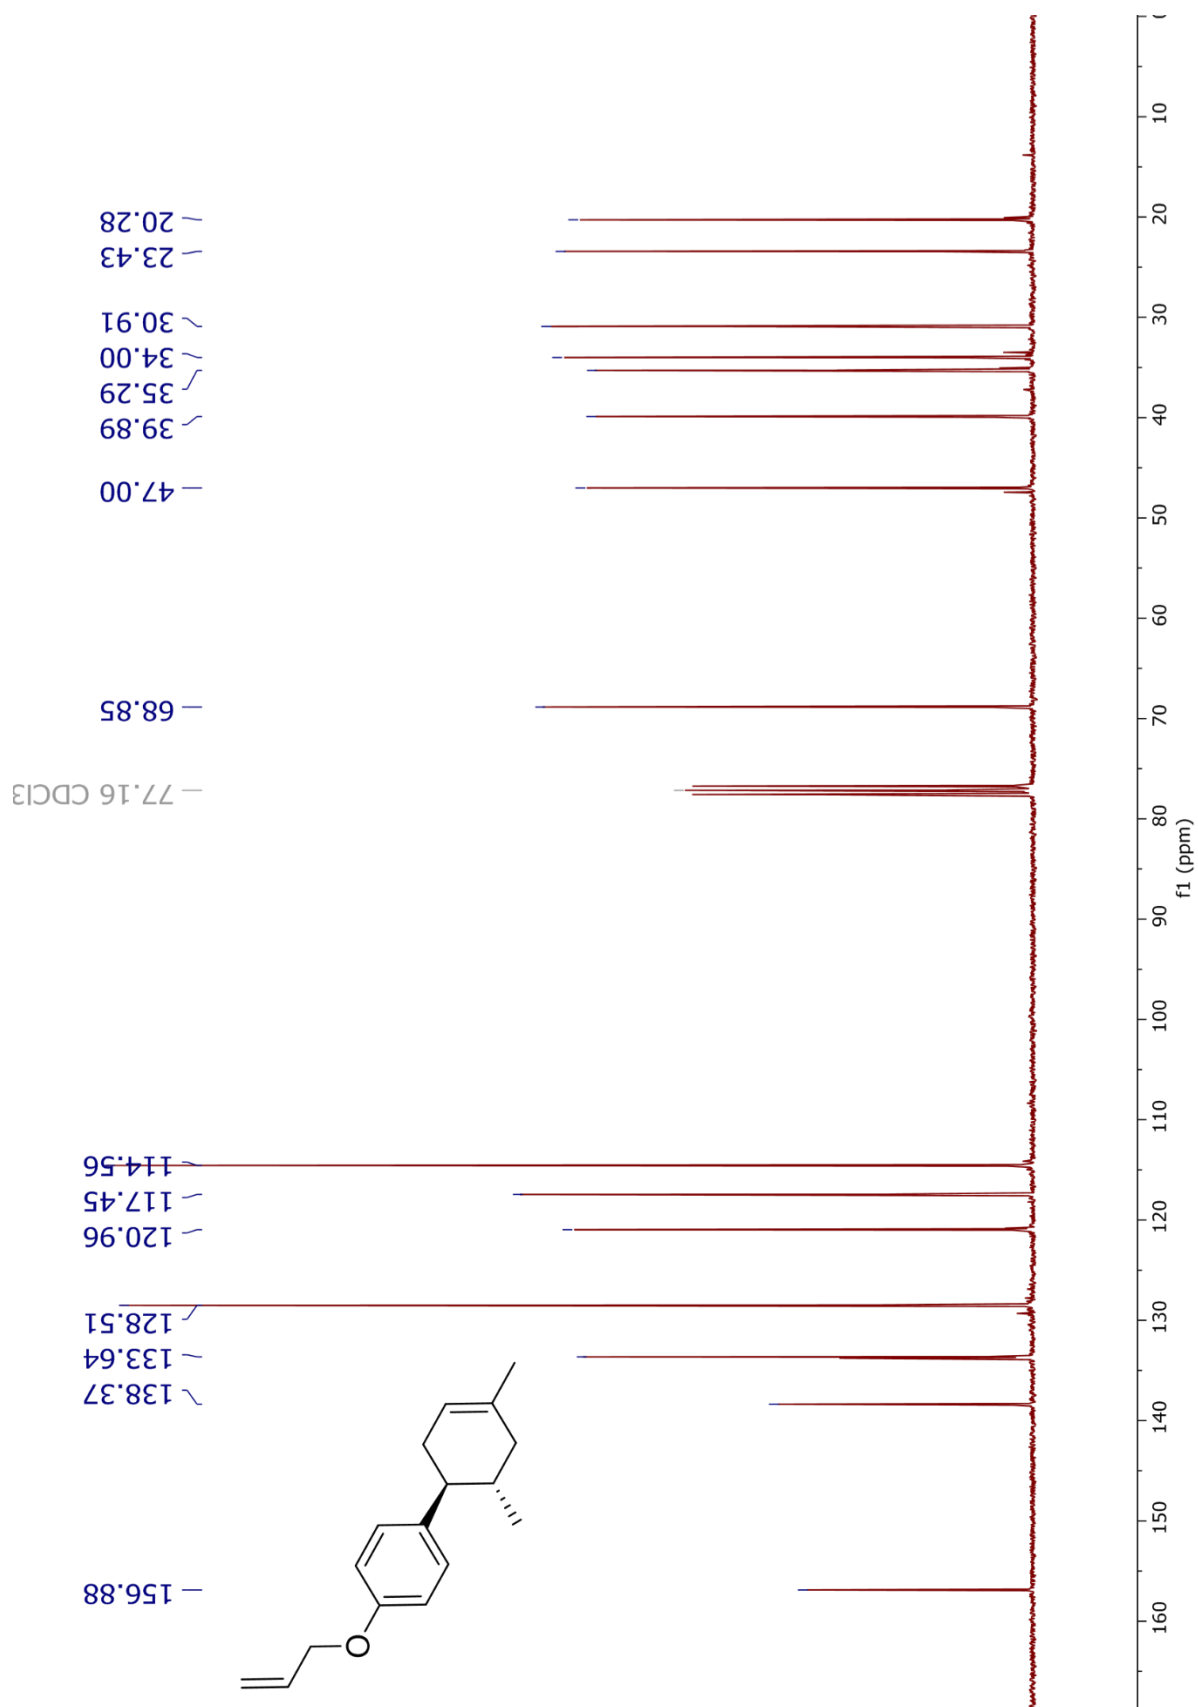

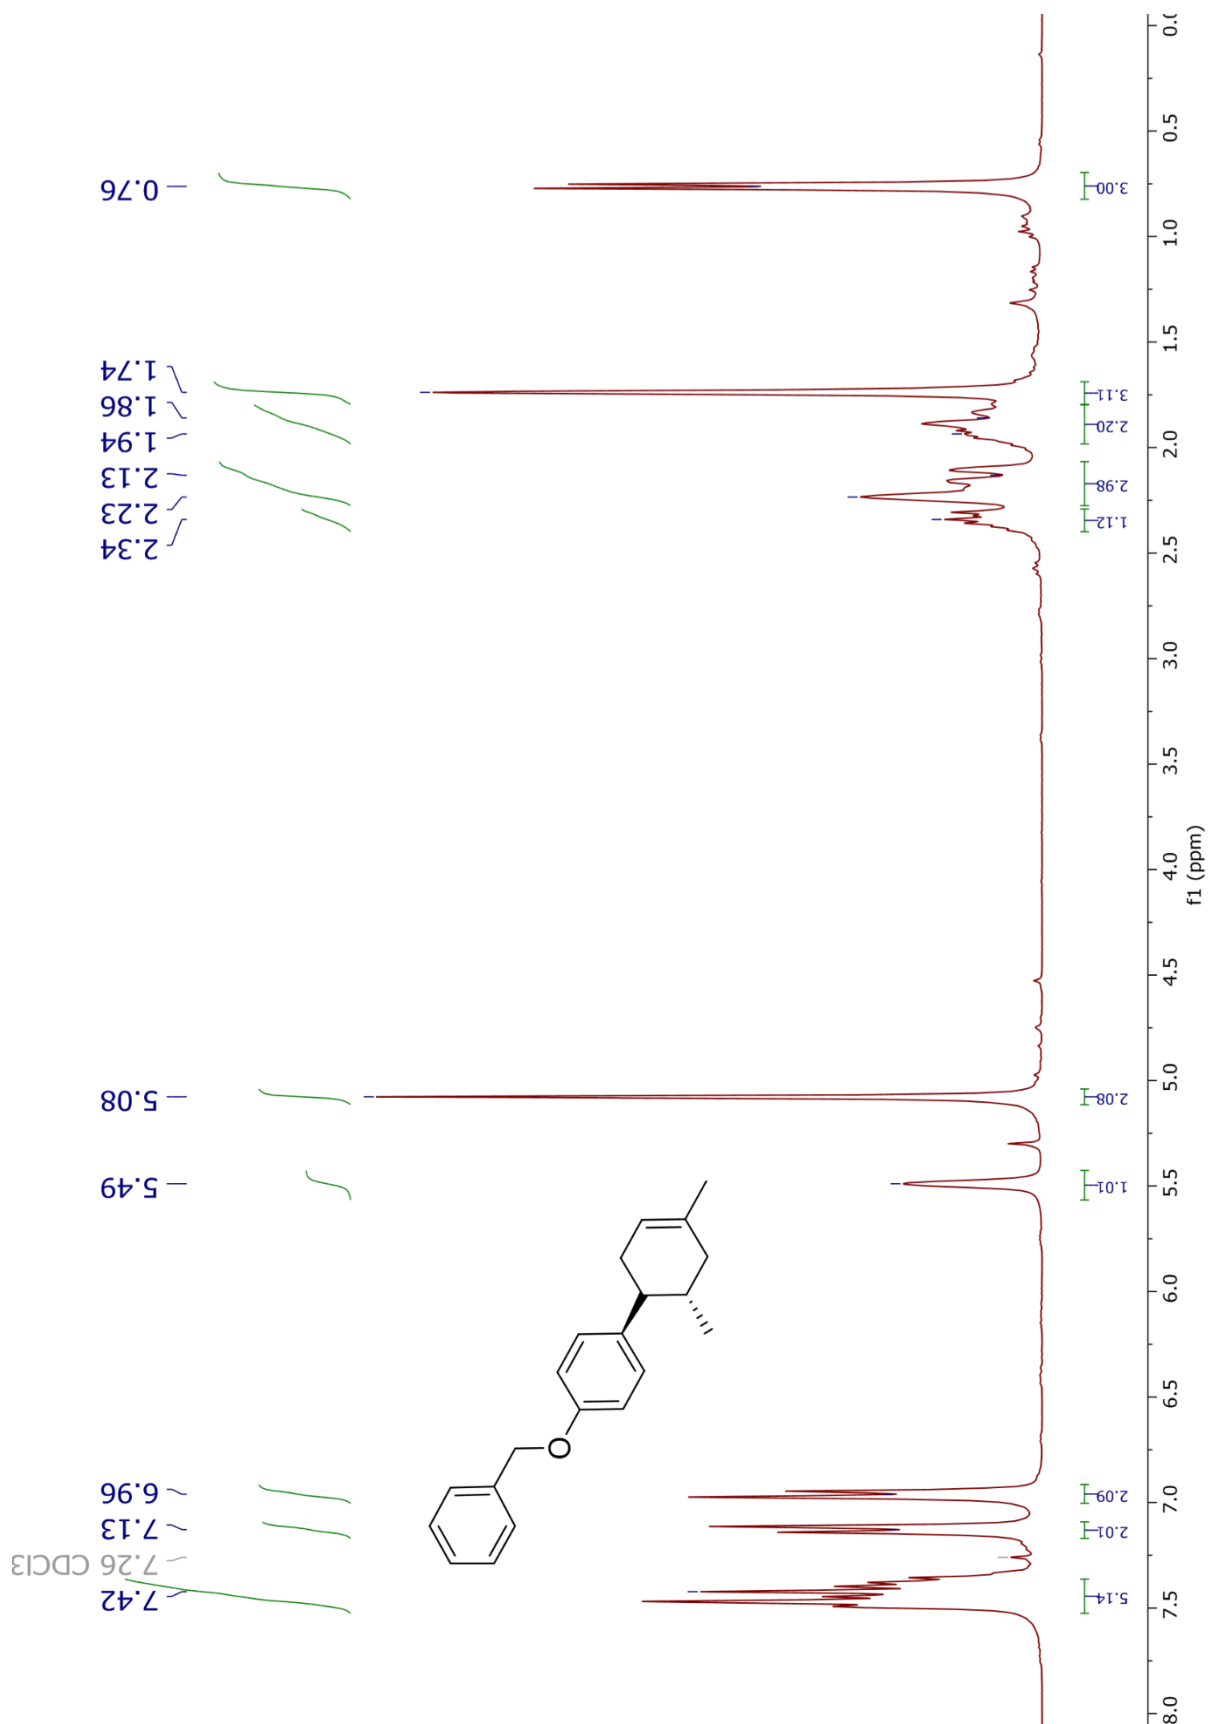

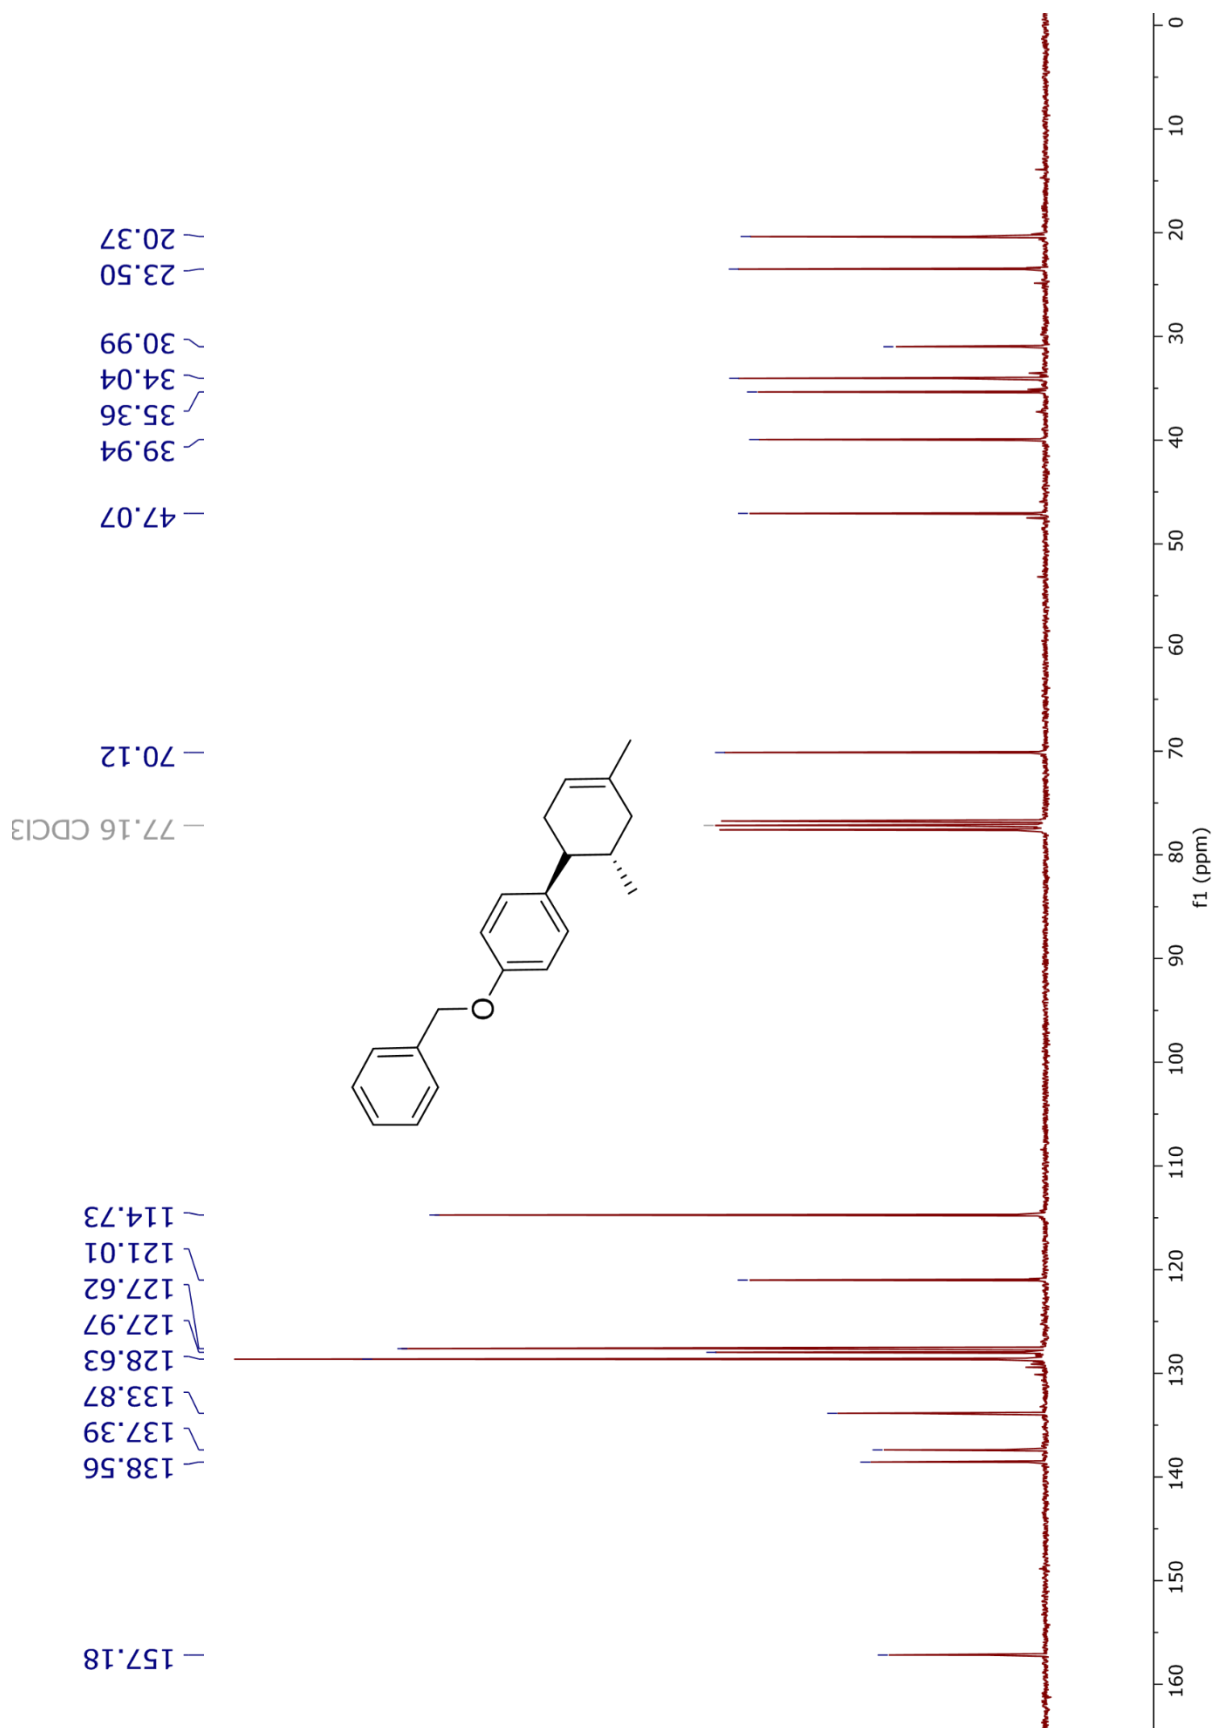

## References

1. S. Tojo, S. Toki and S. Takamuku, *J. Org. Chem.*, 1991, **56**, 6240-6243.
